# Supplementary material for: Lifestyle physical activity intensity and rapid-rate non-sustained ventricular tachycardia in arrhythmogenic cardiomyopathy
Source: bioRxiv or medRxiv preprint supplement (doi:10.1101/2022.07.27.22278124), 2022-09-20

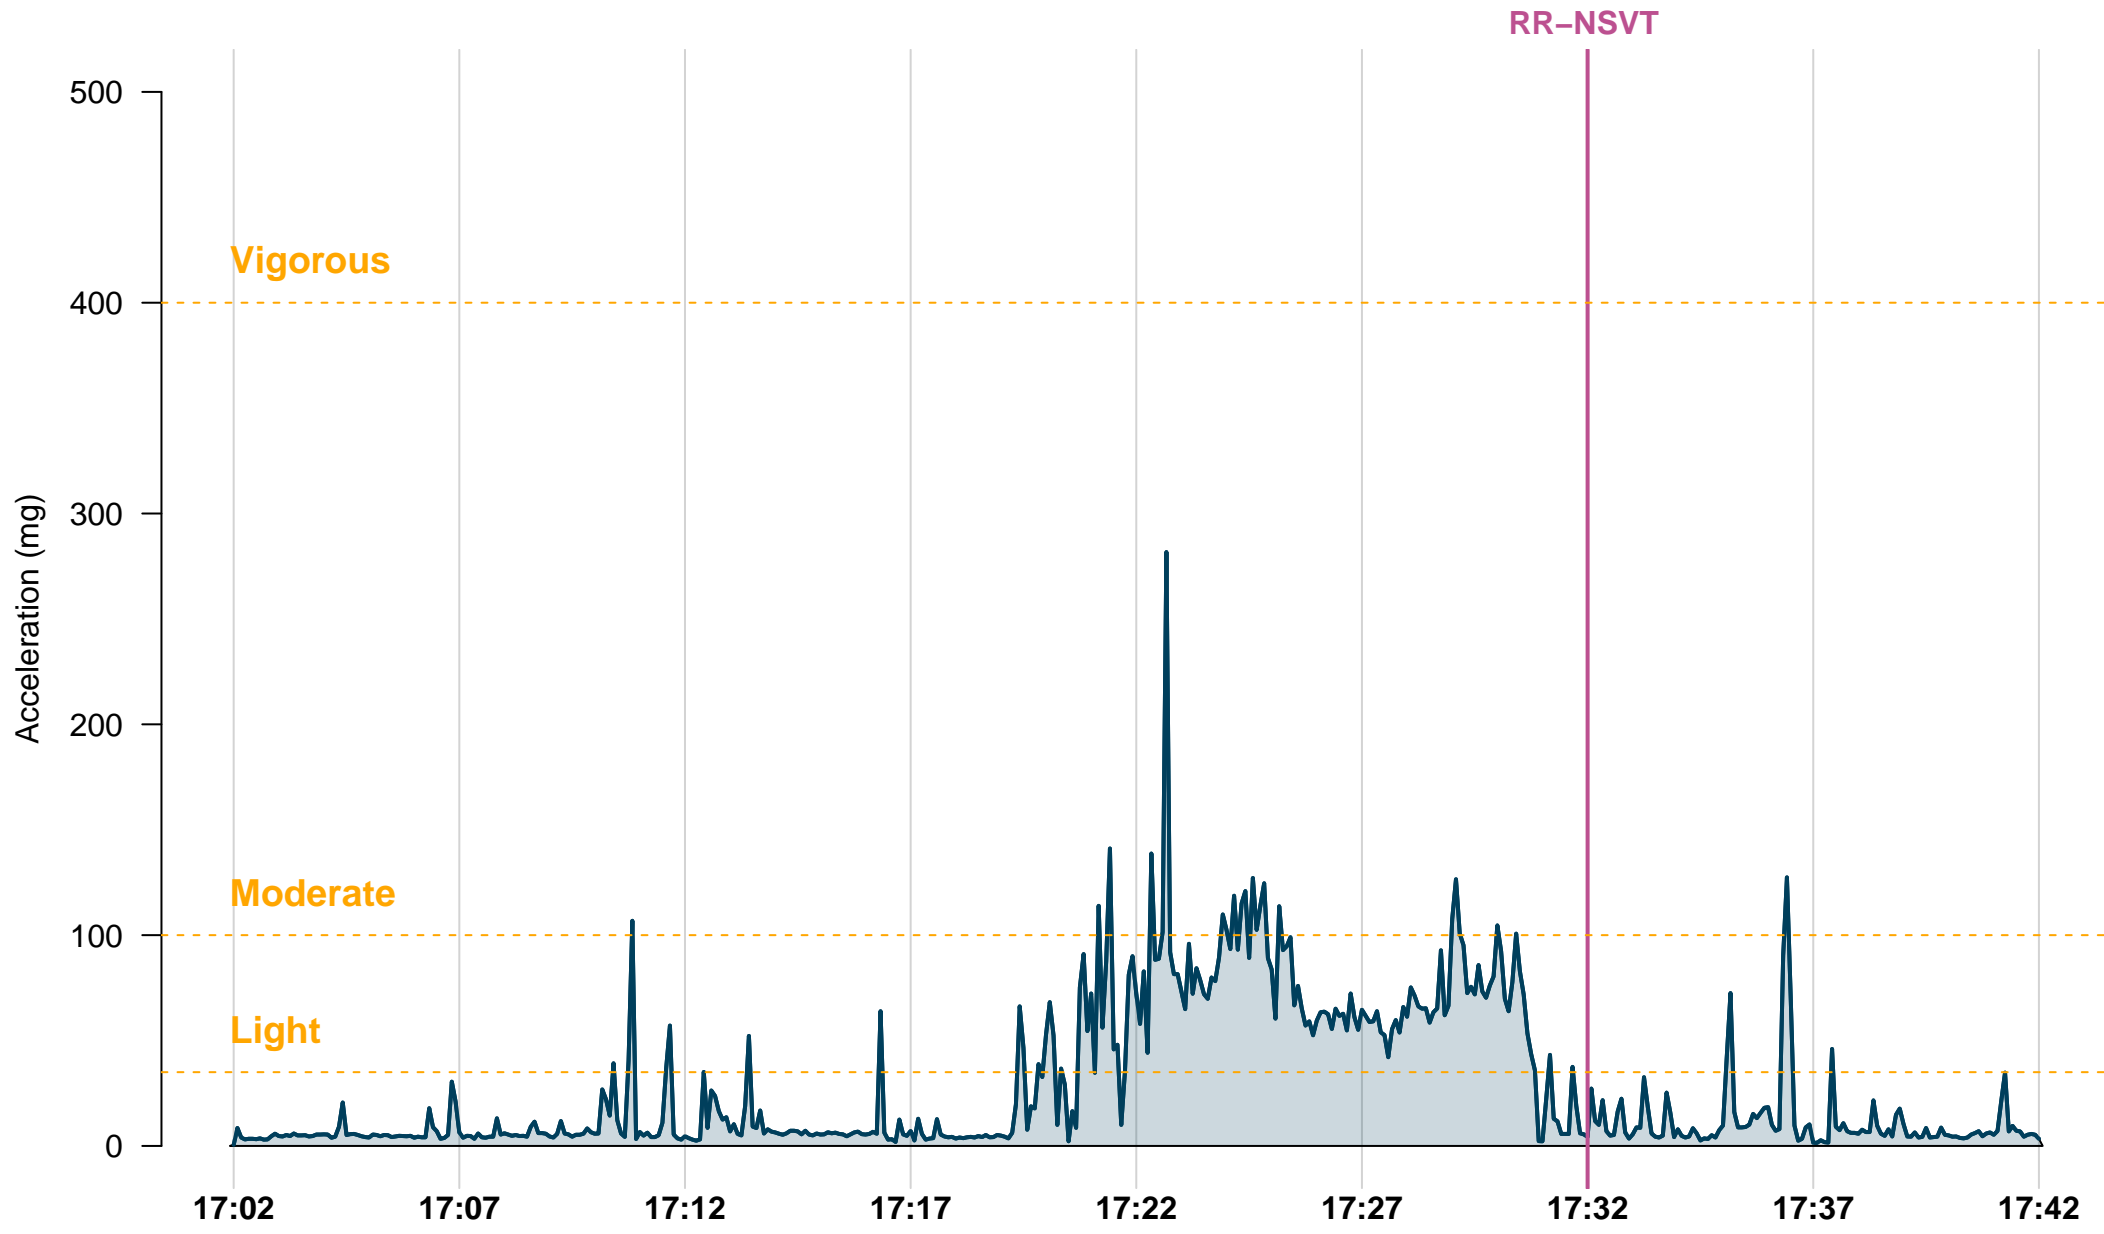

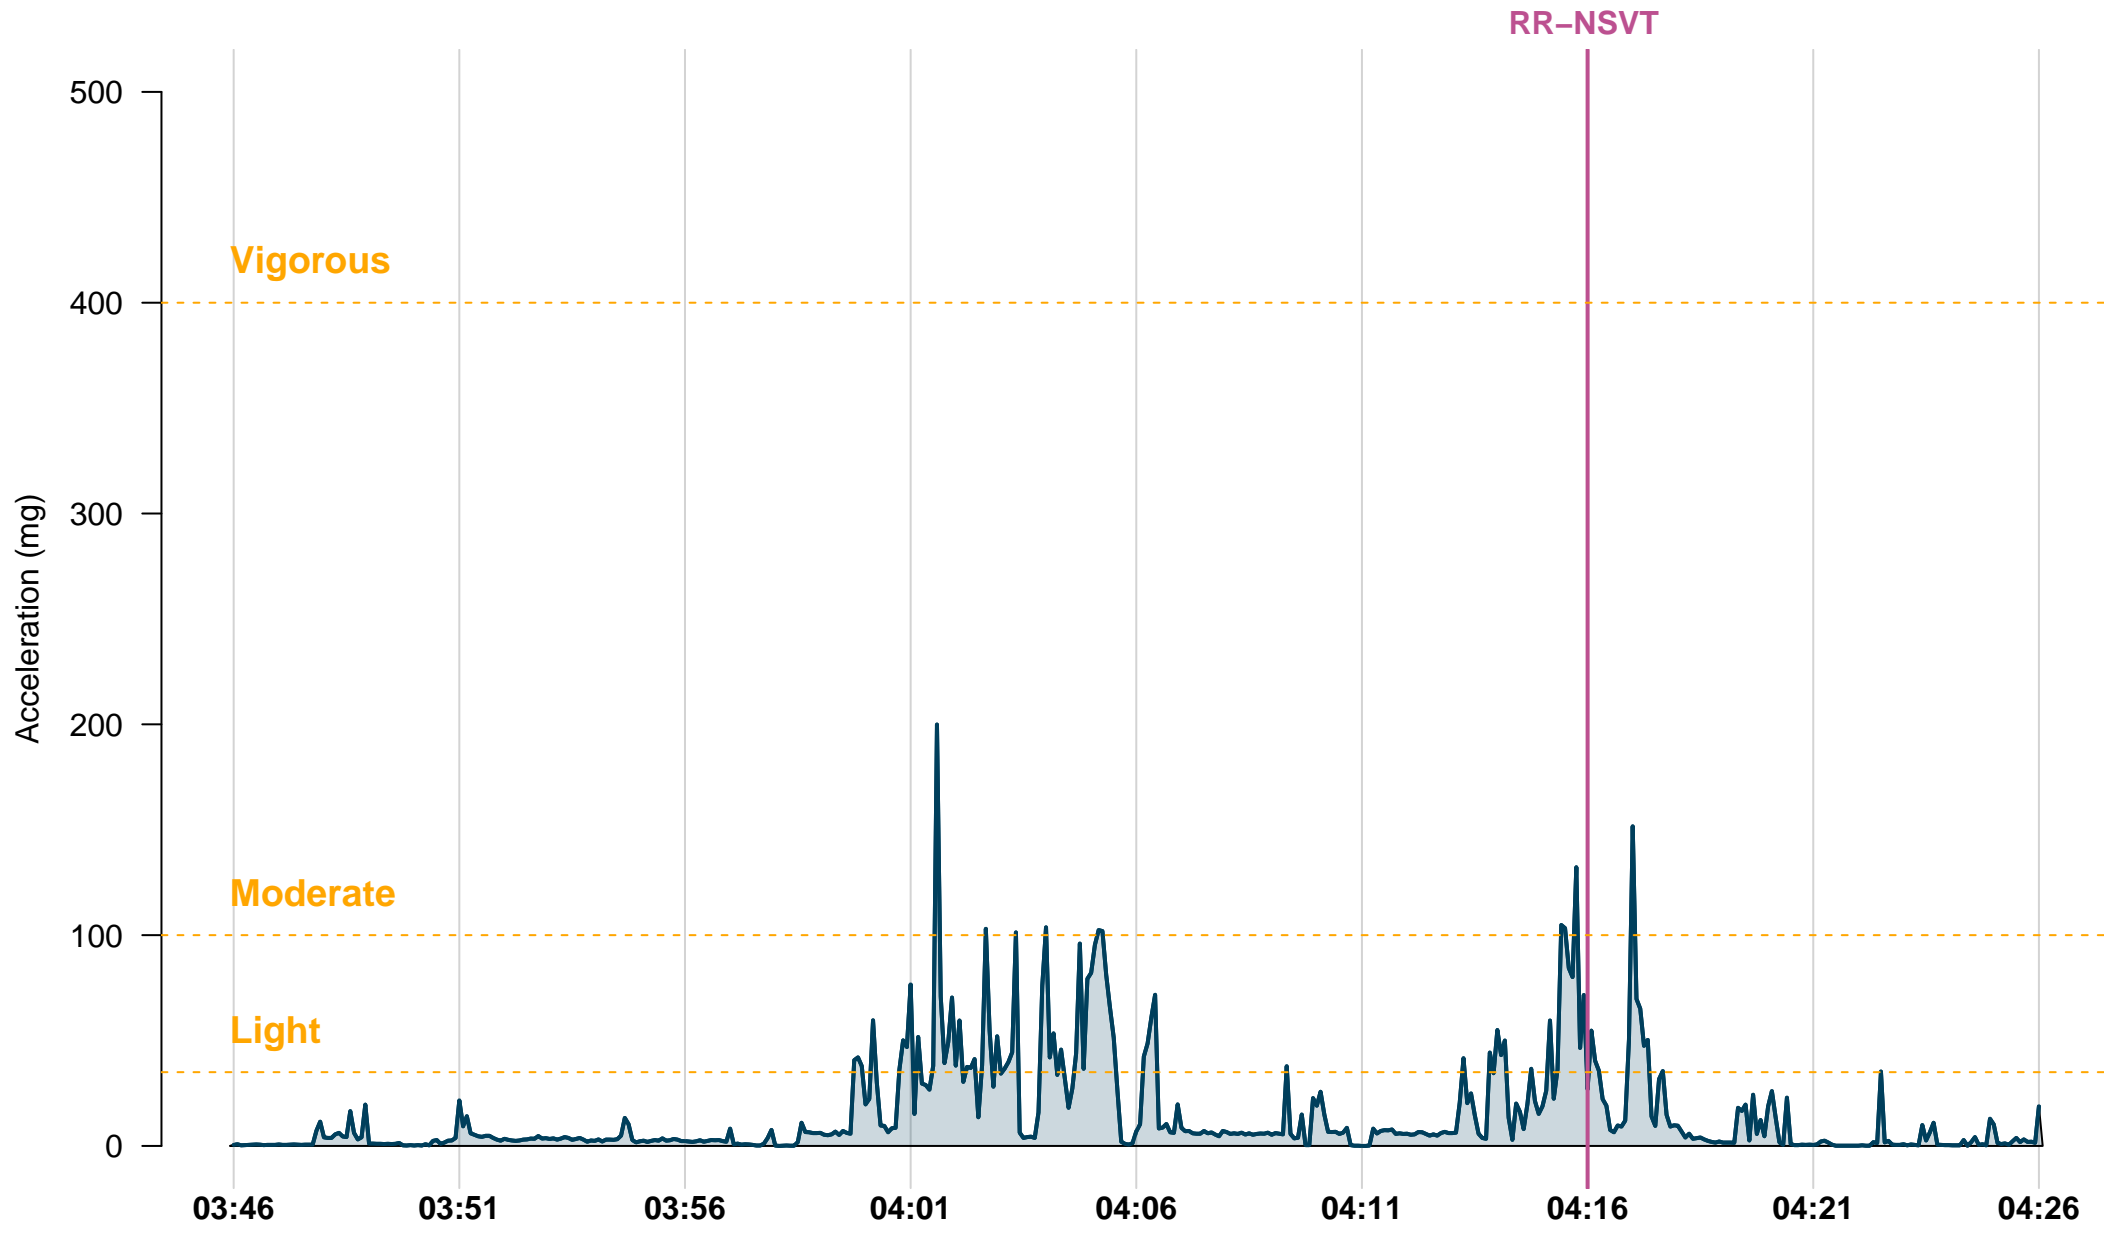

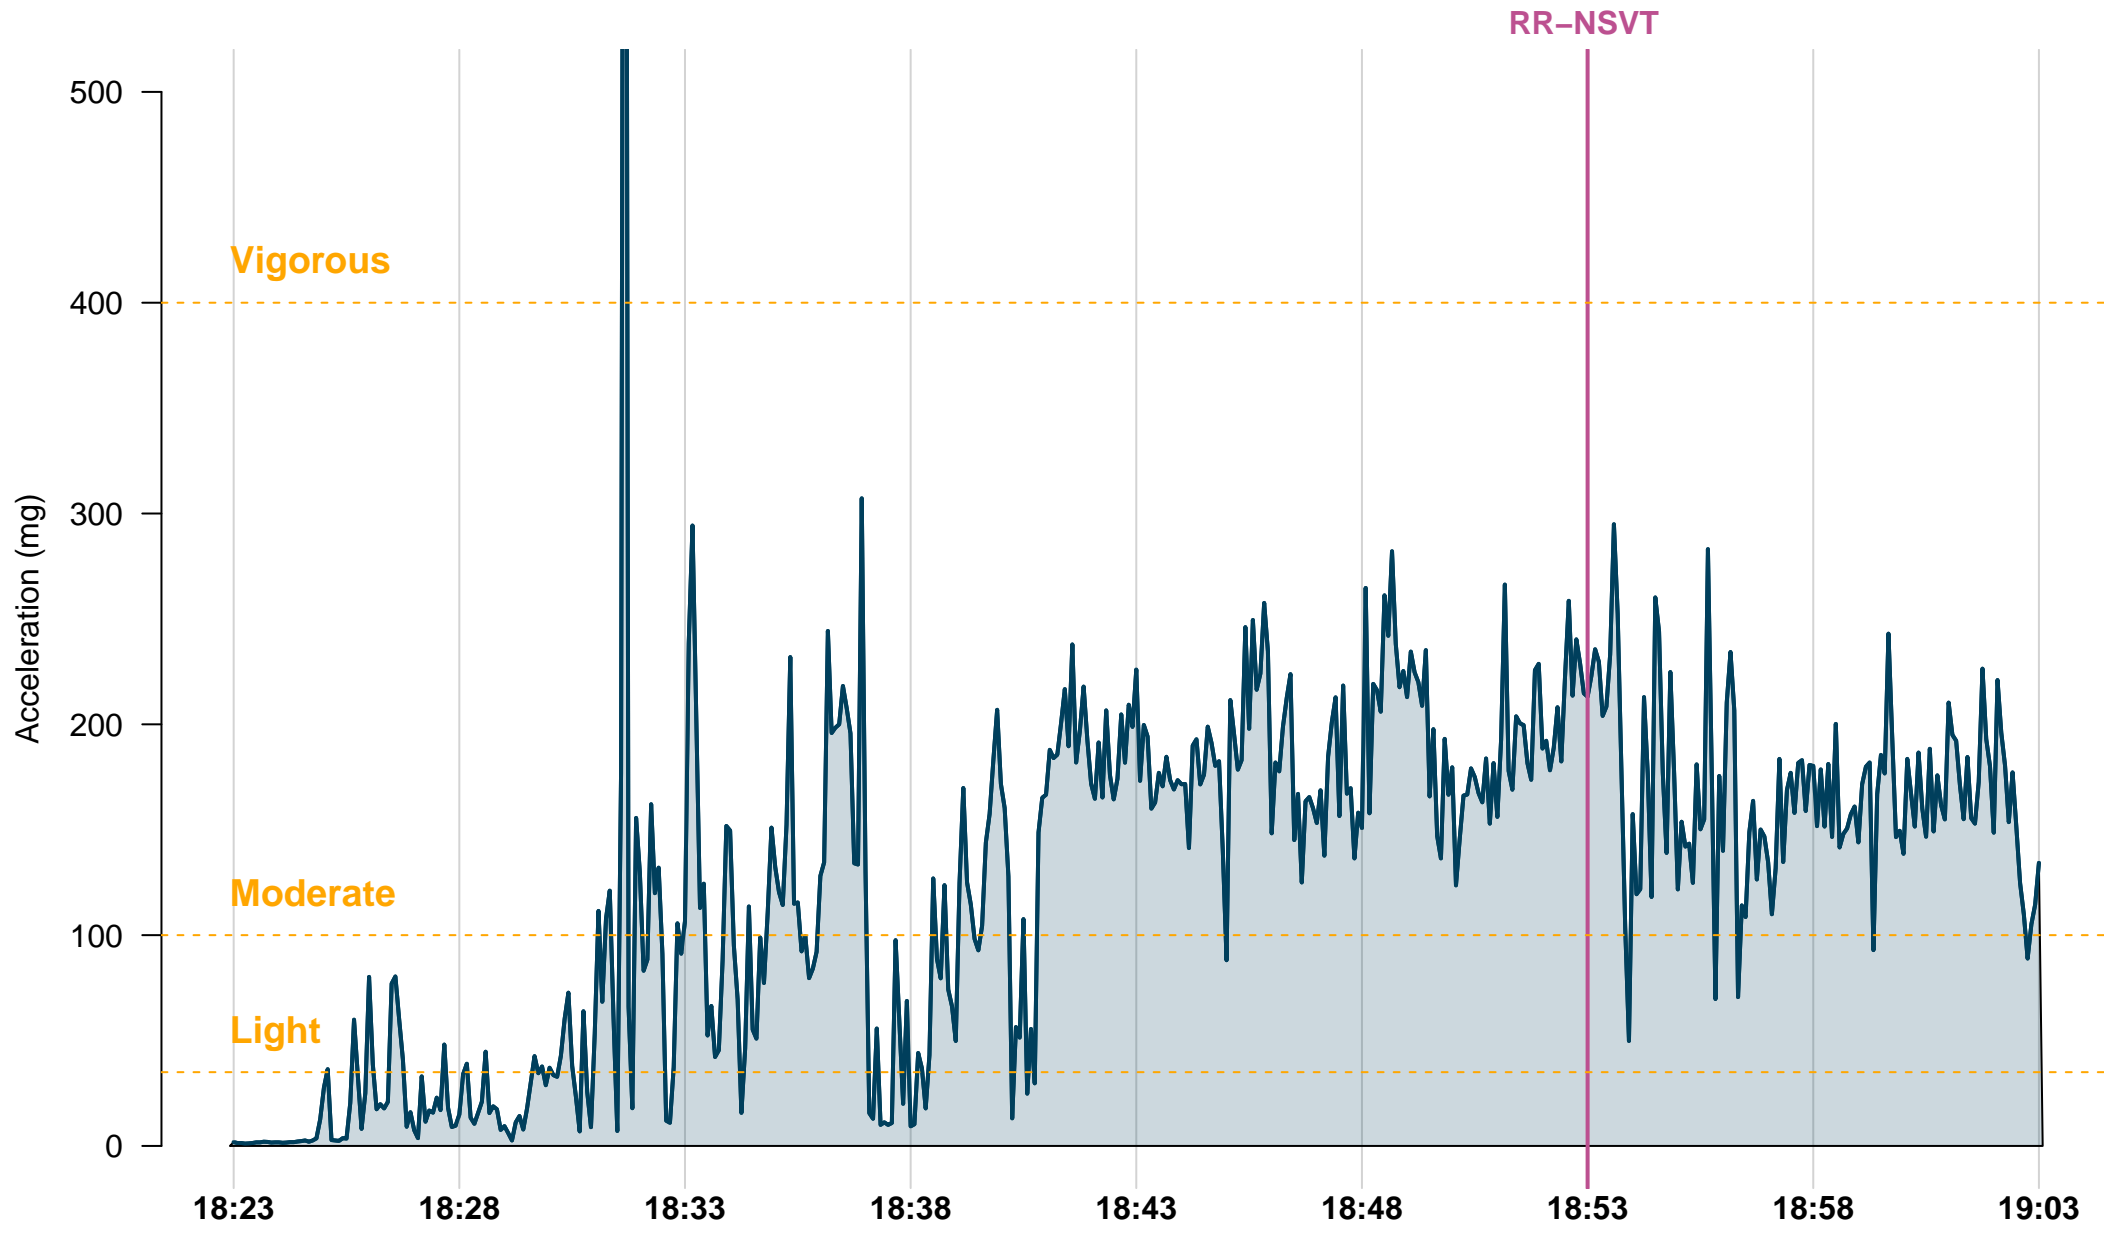

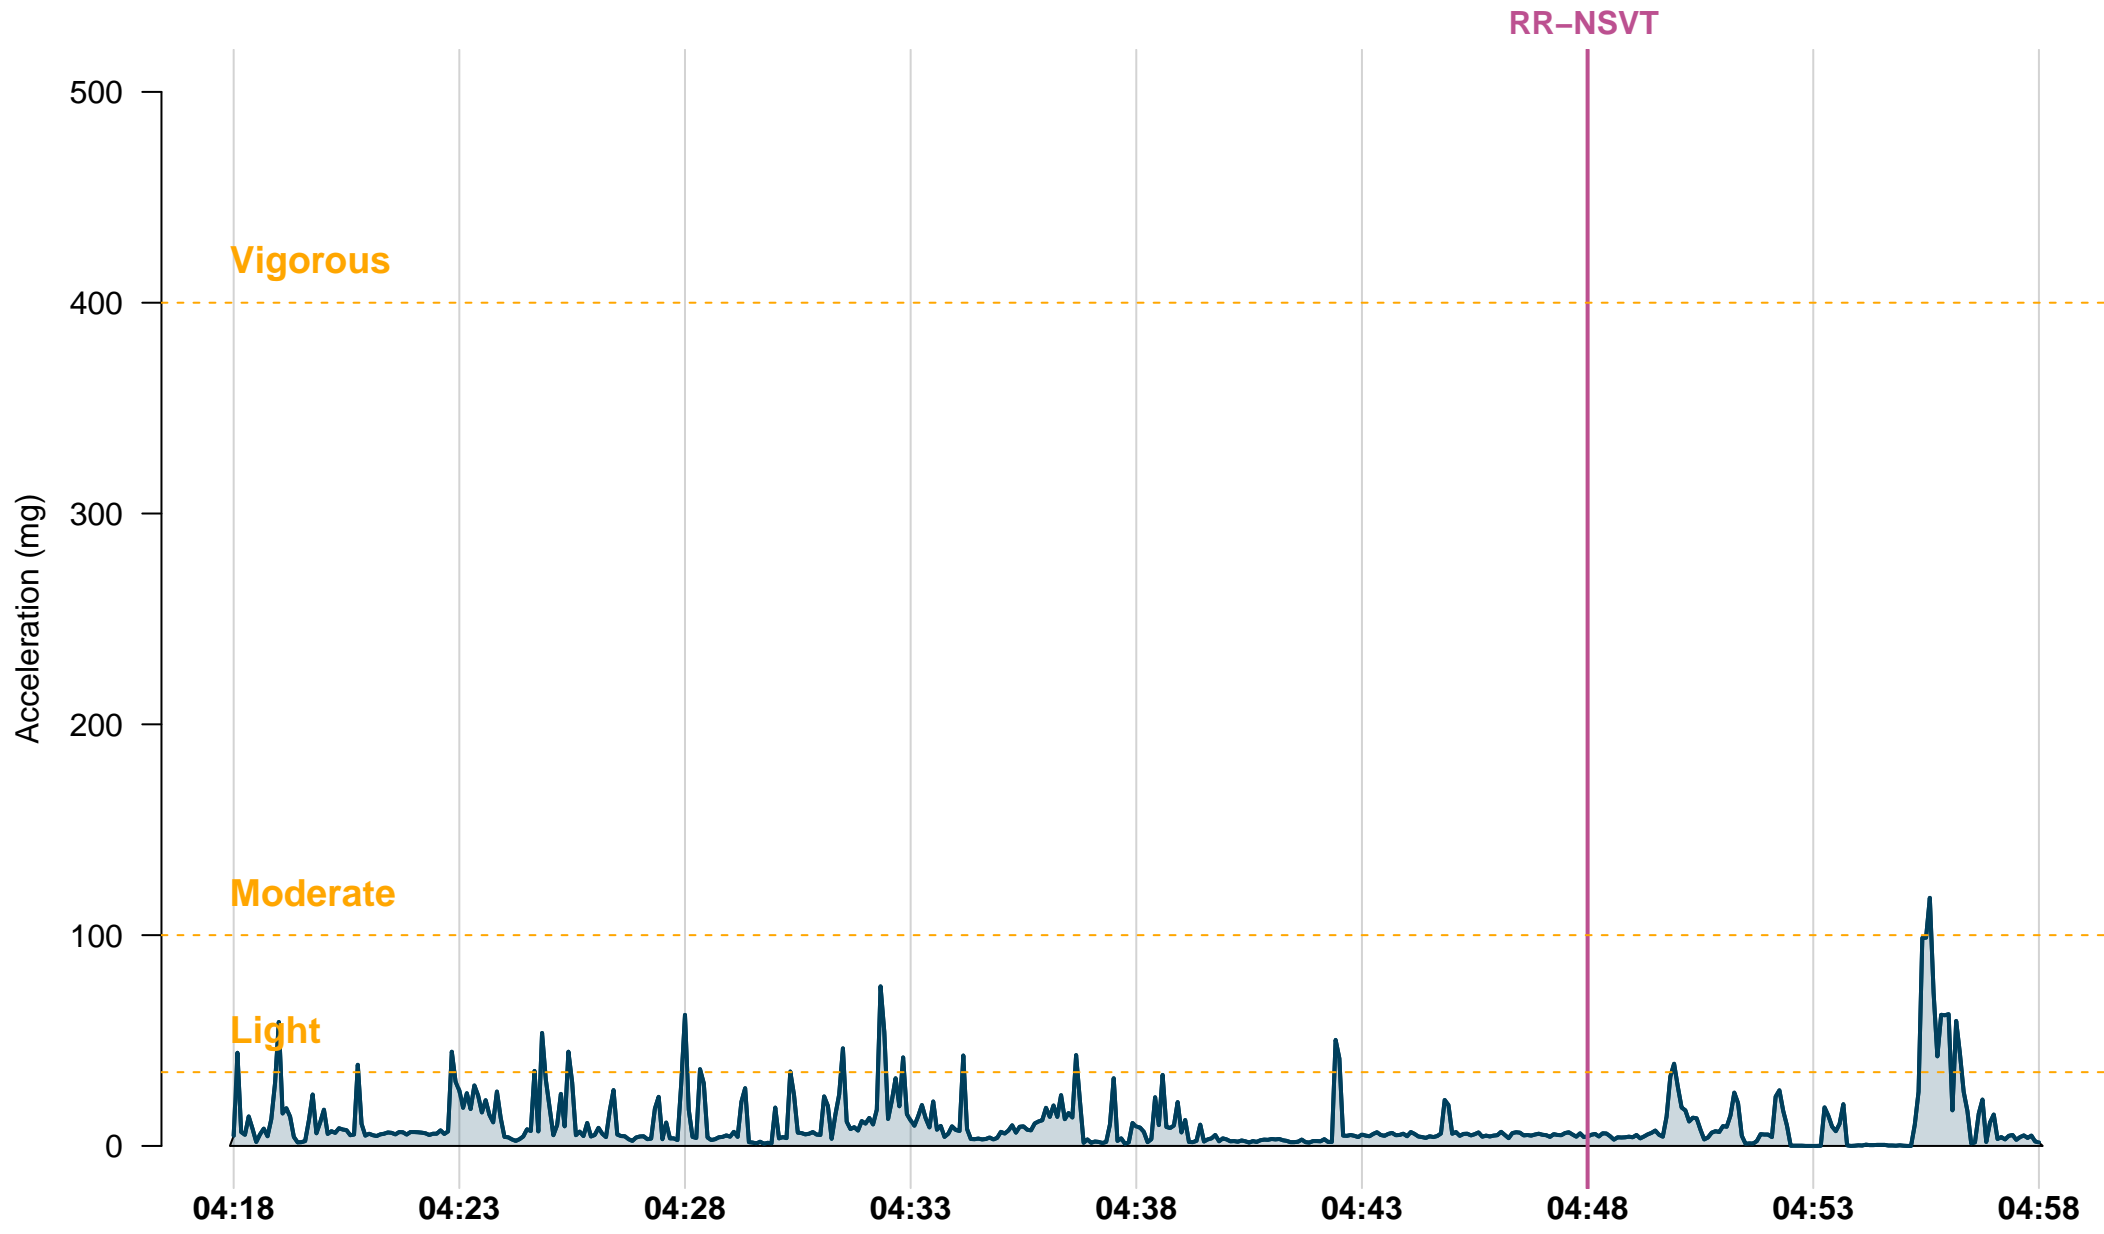

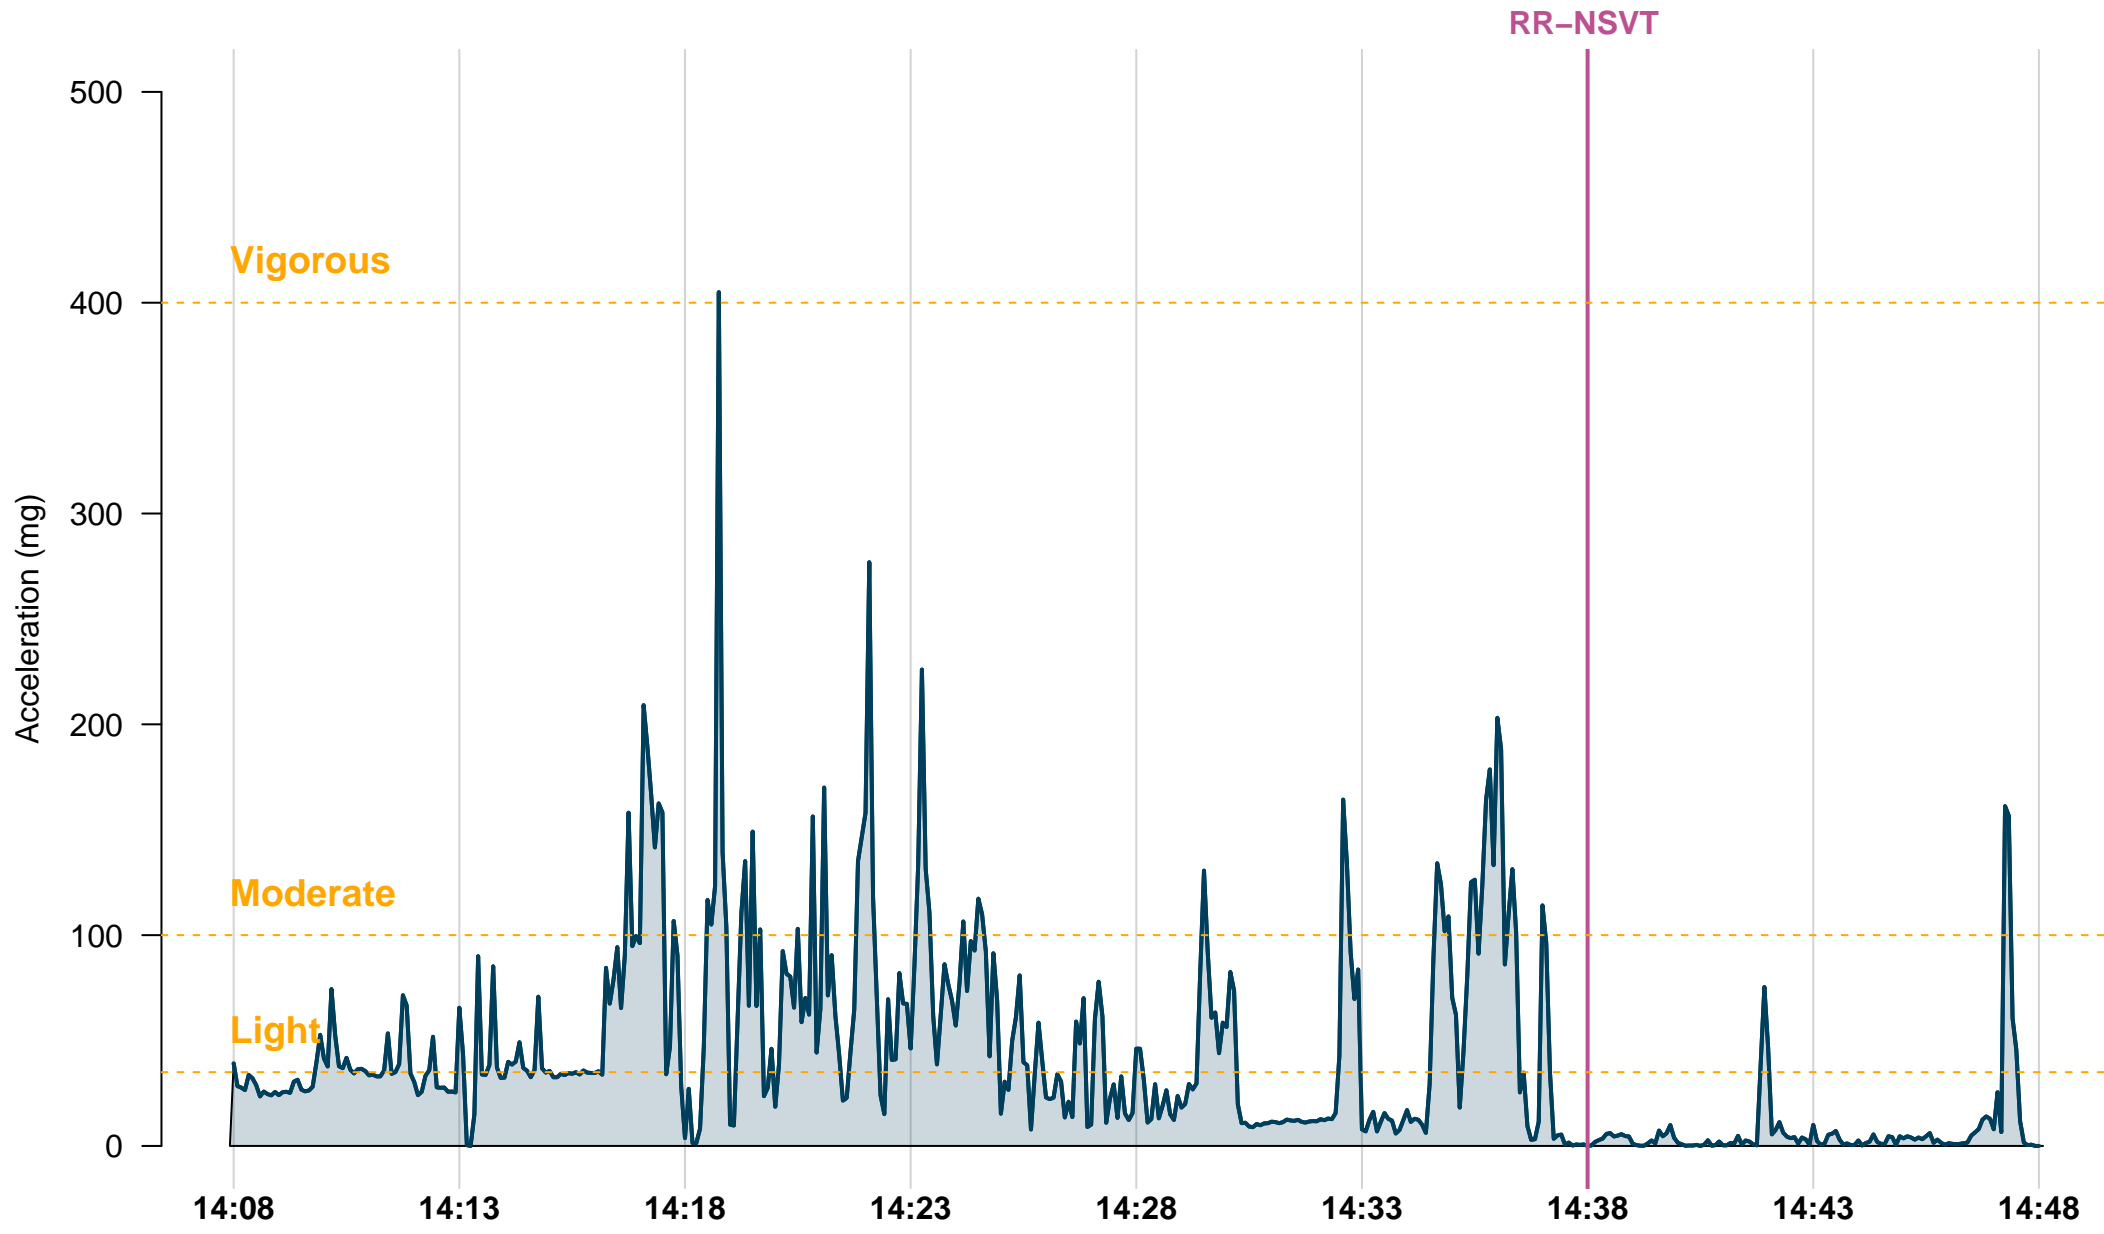

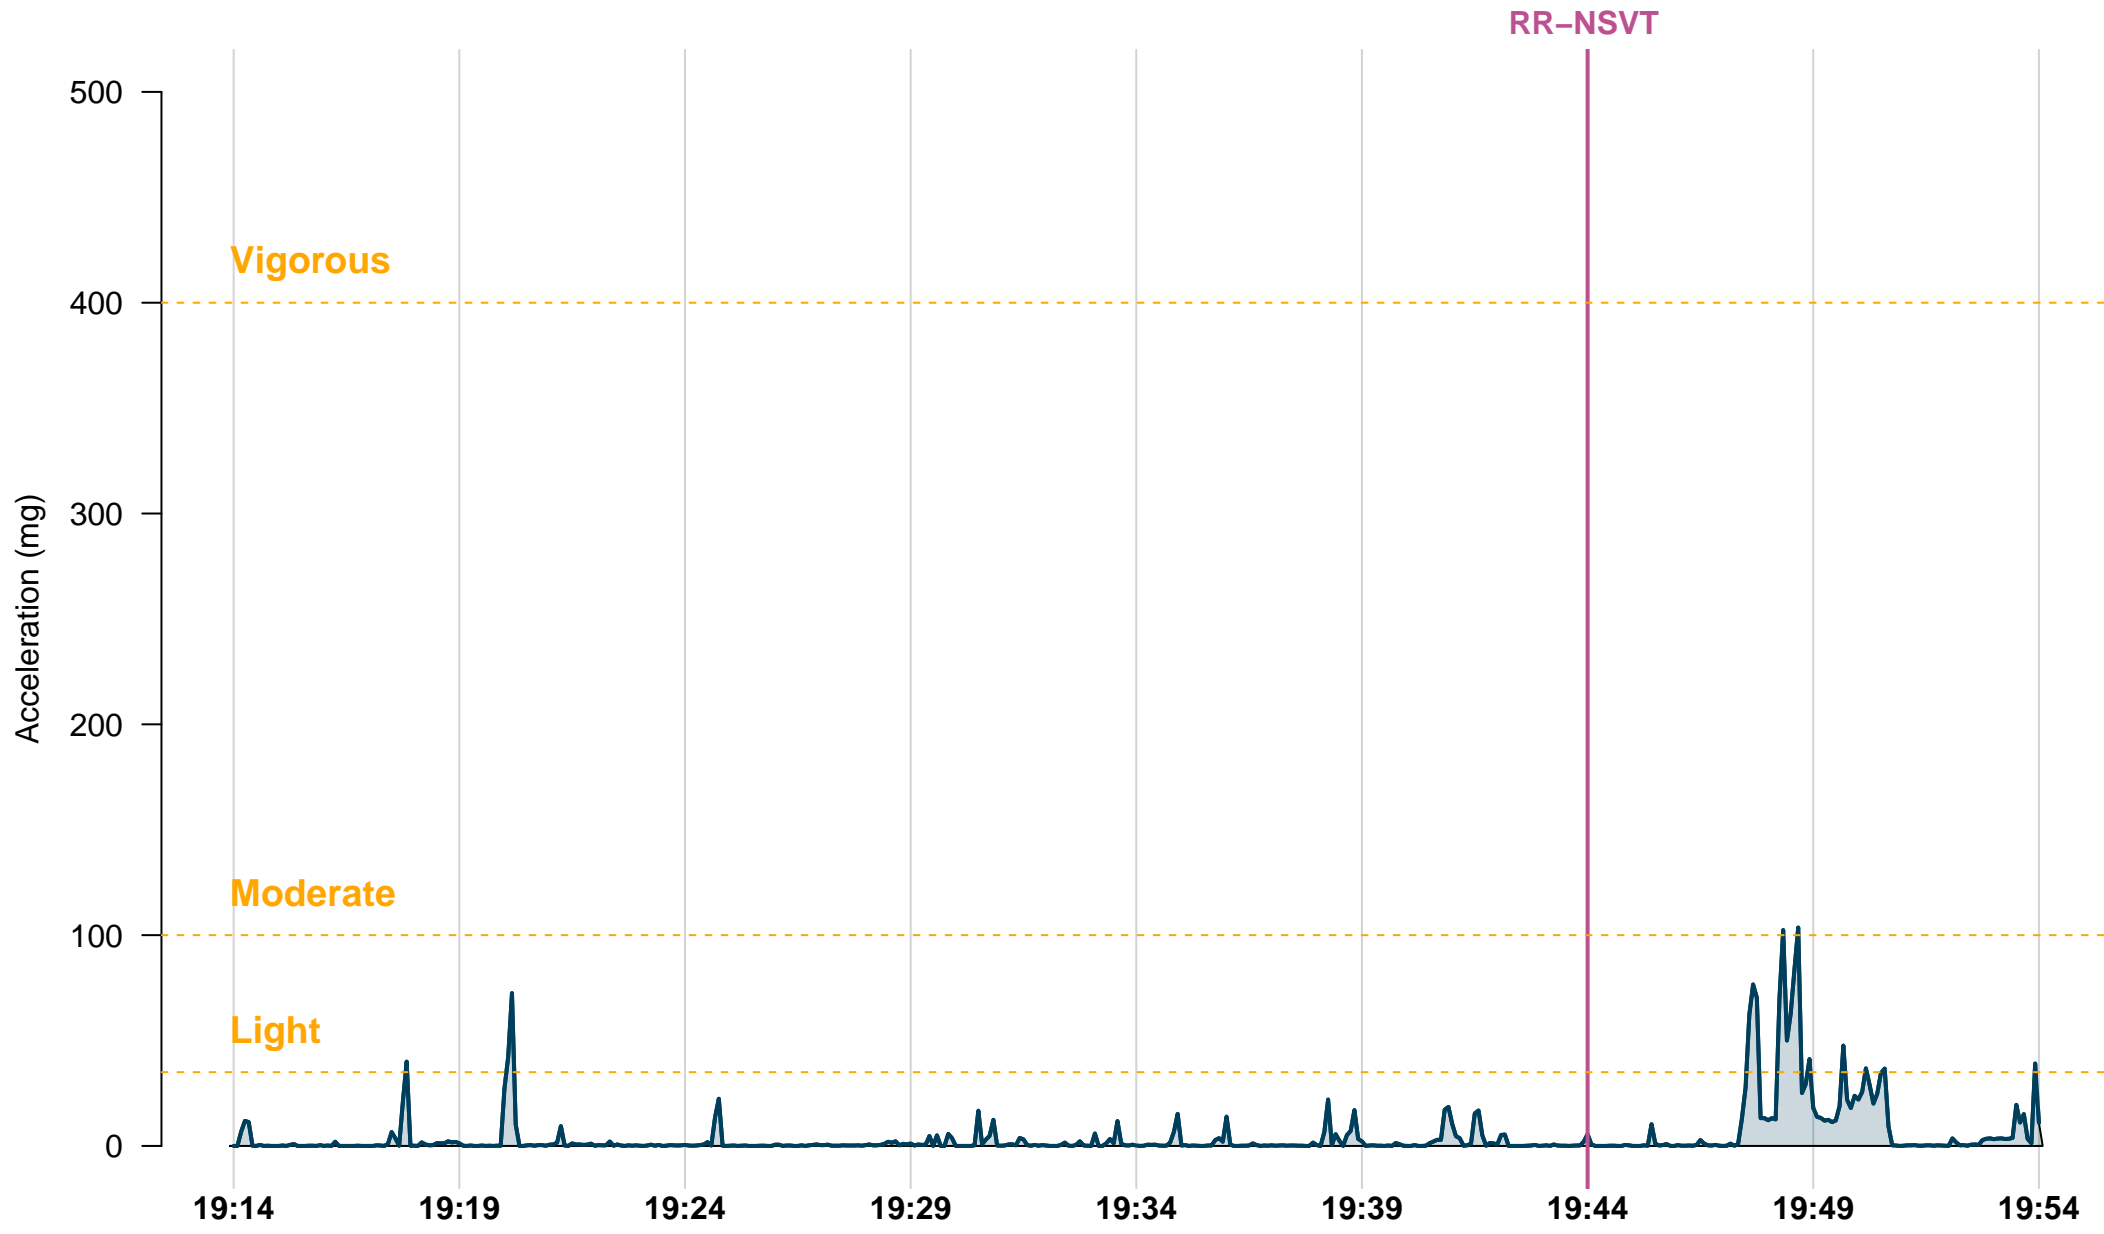

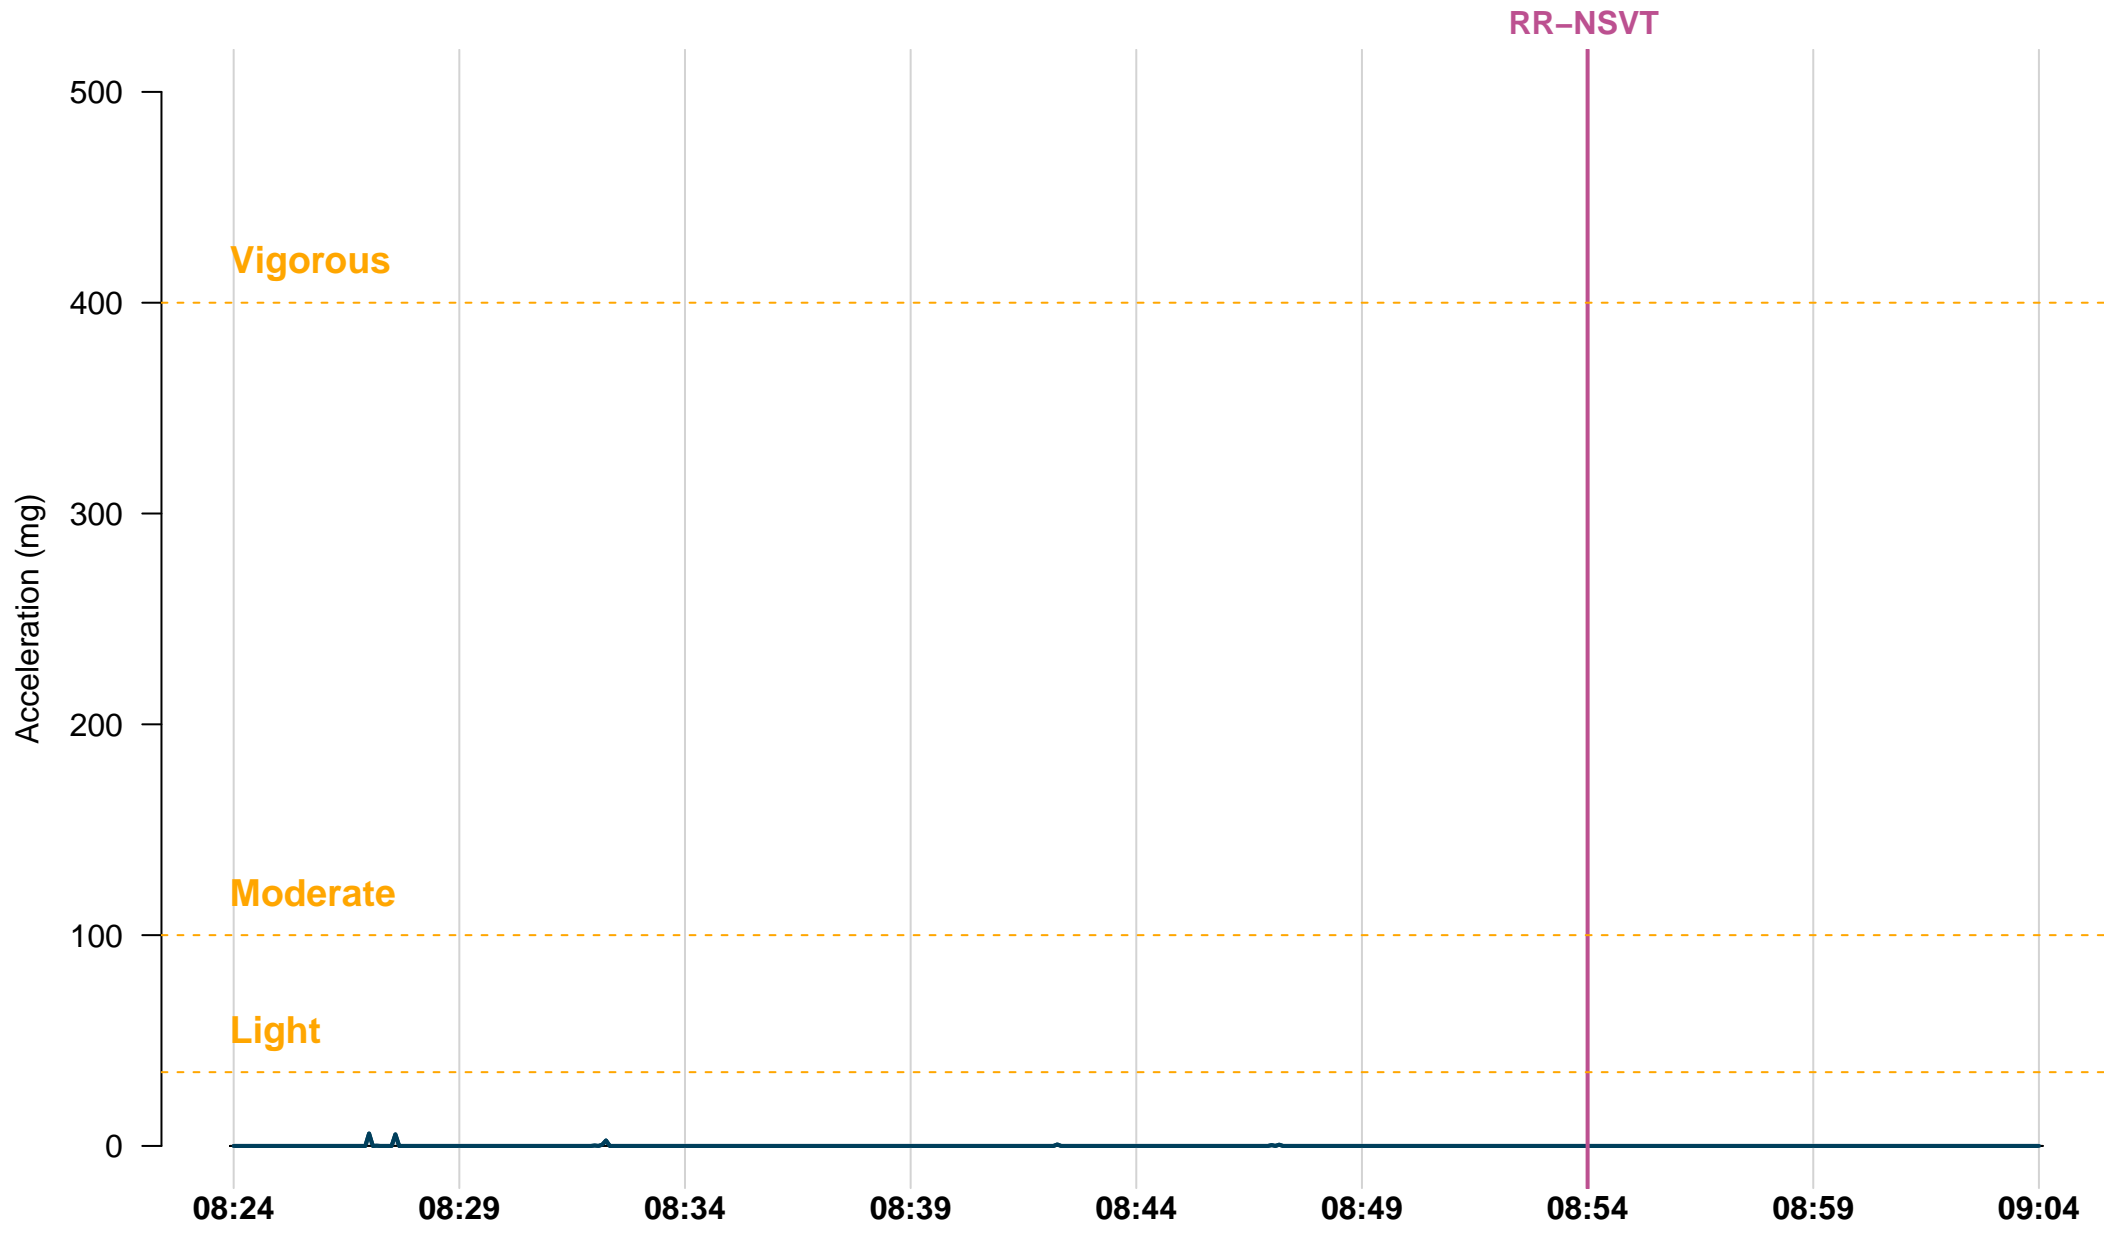

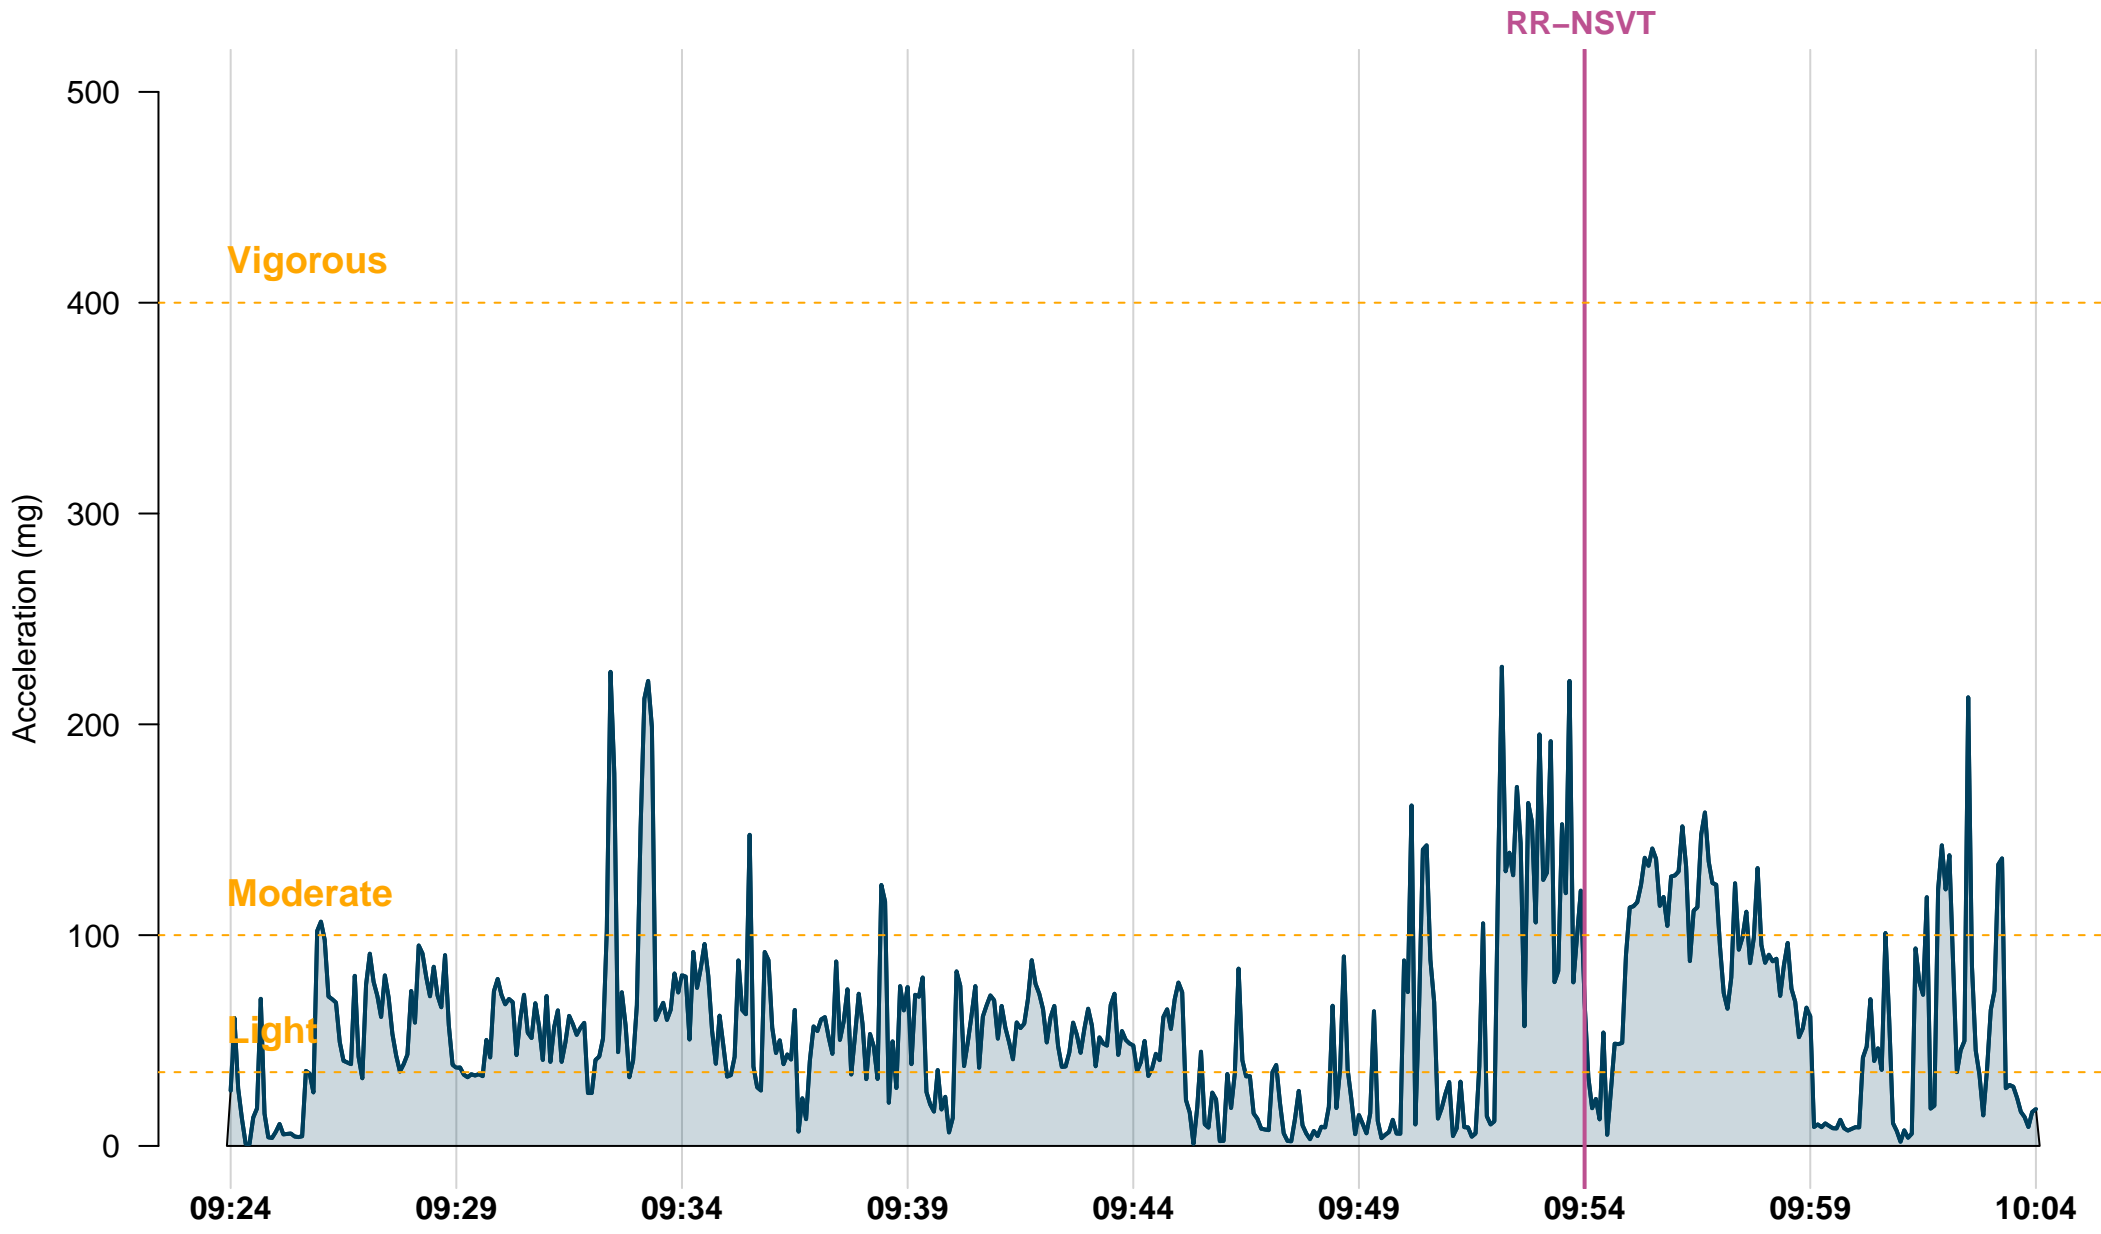



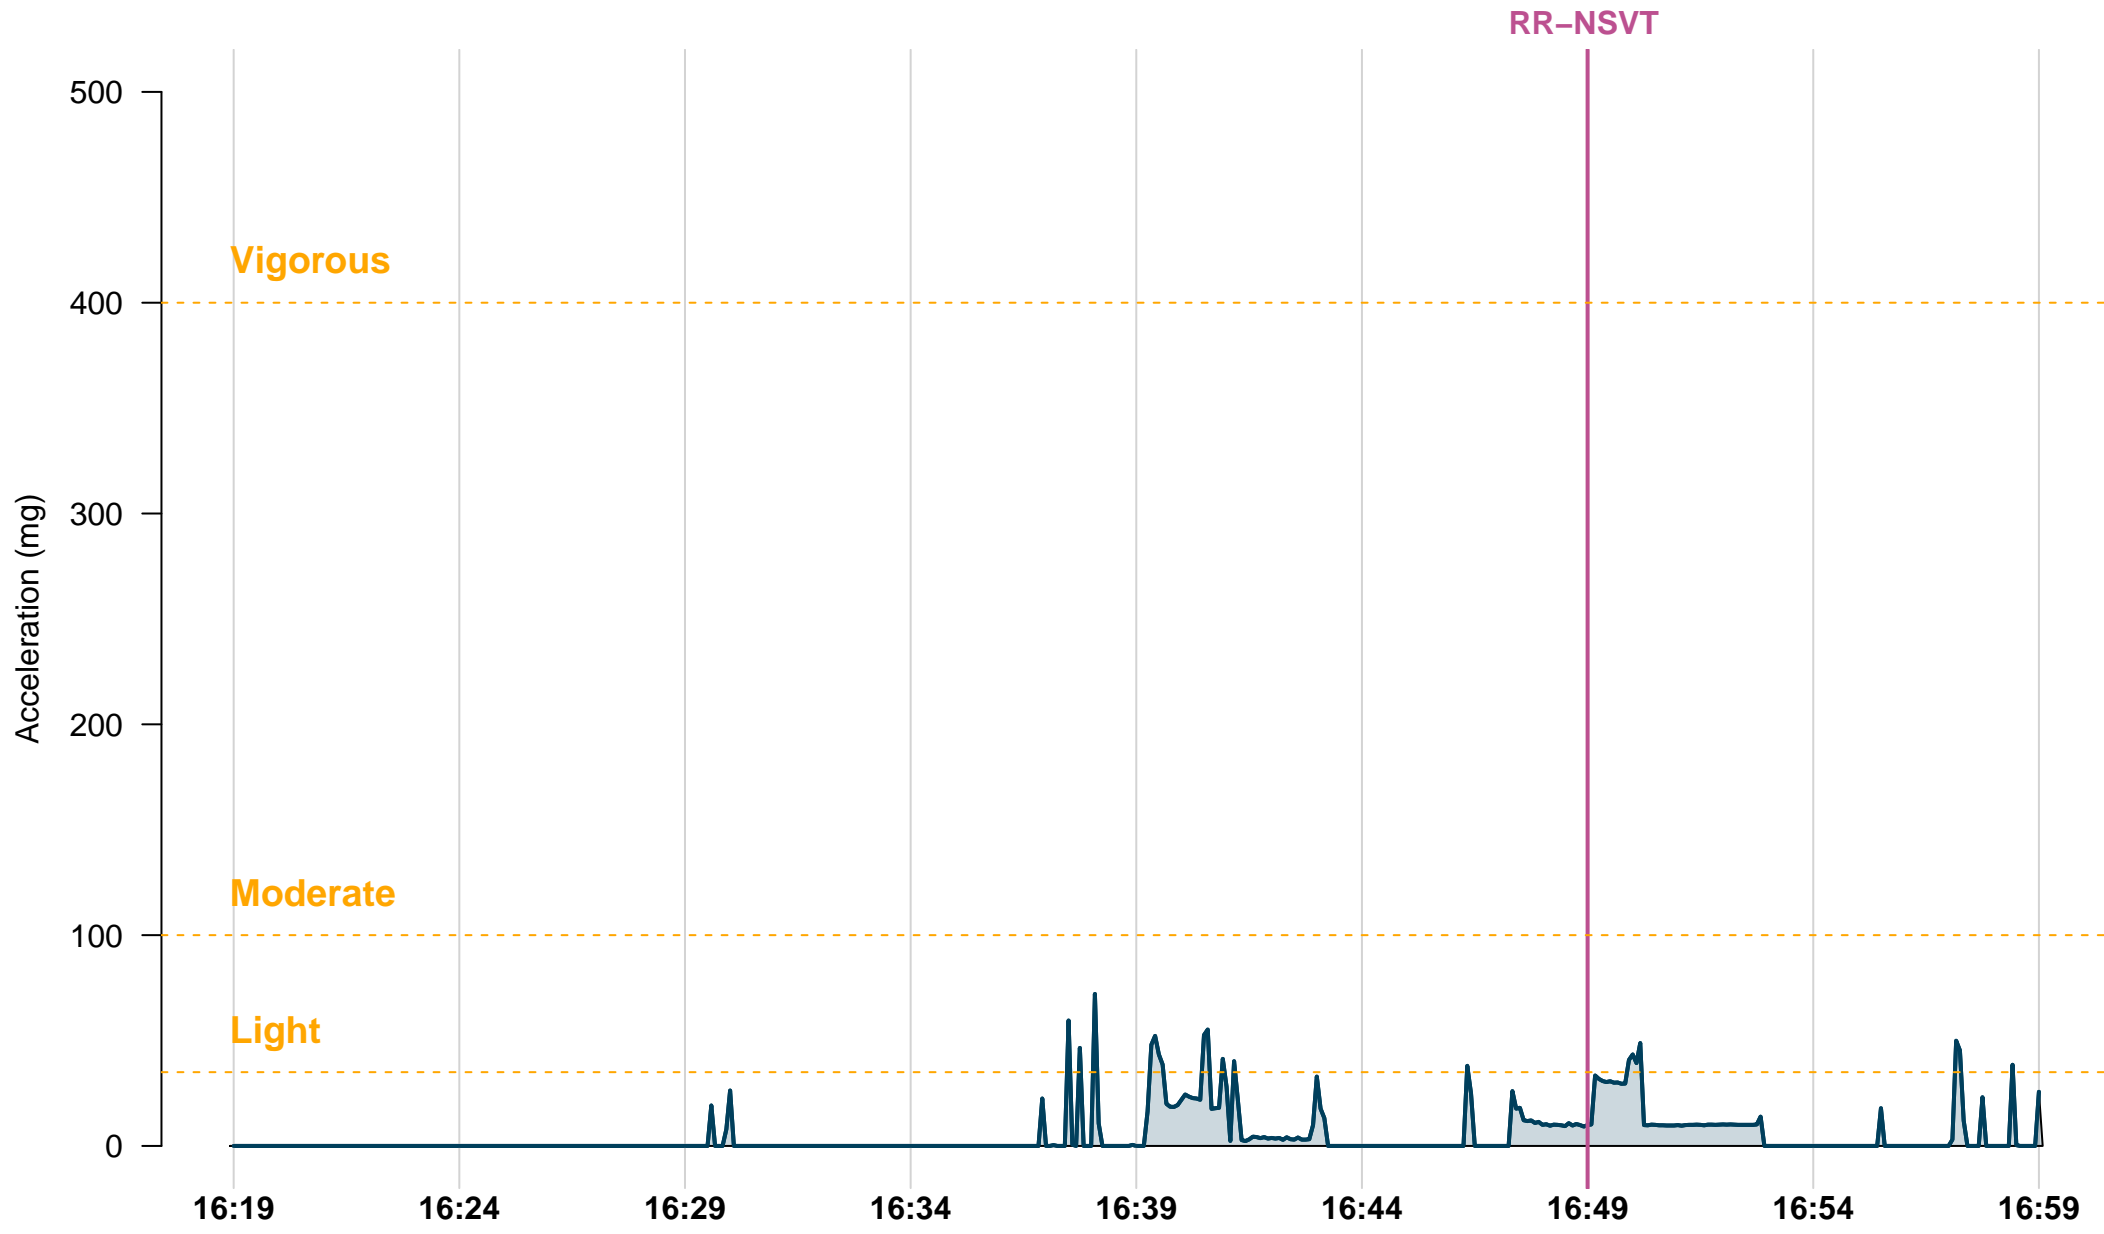

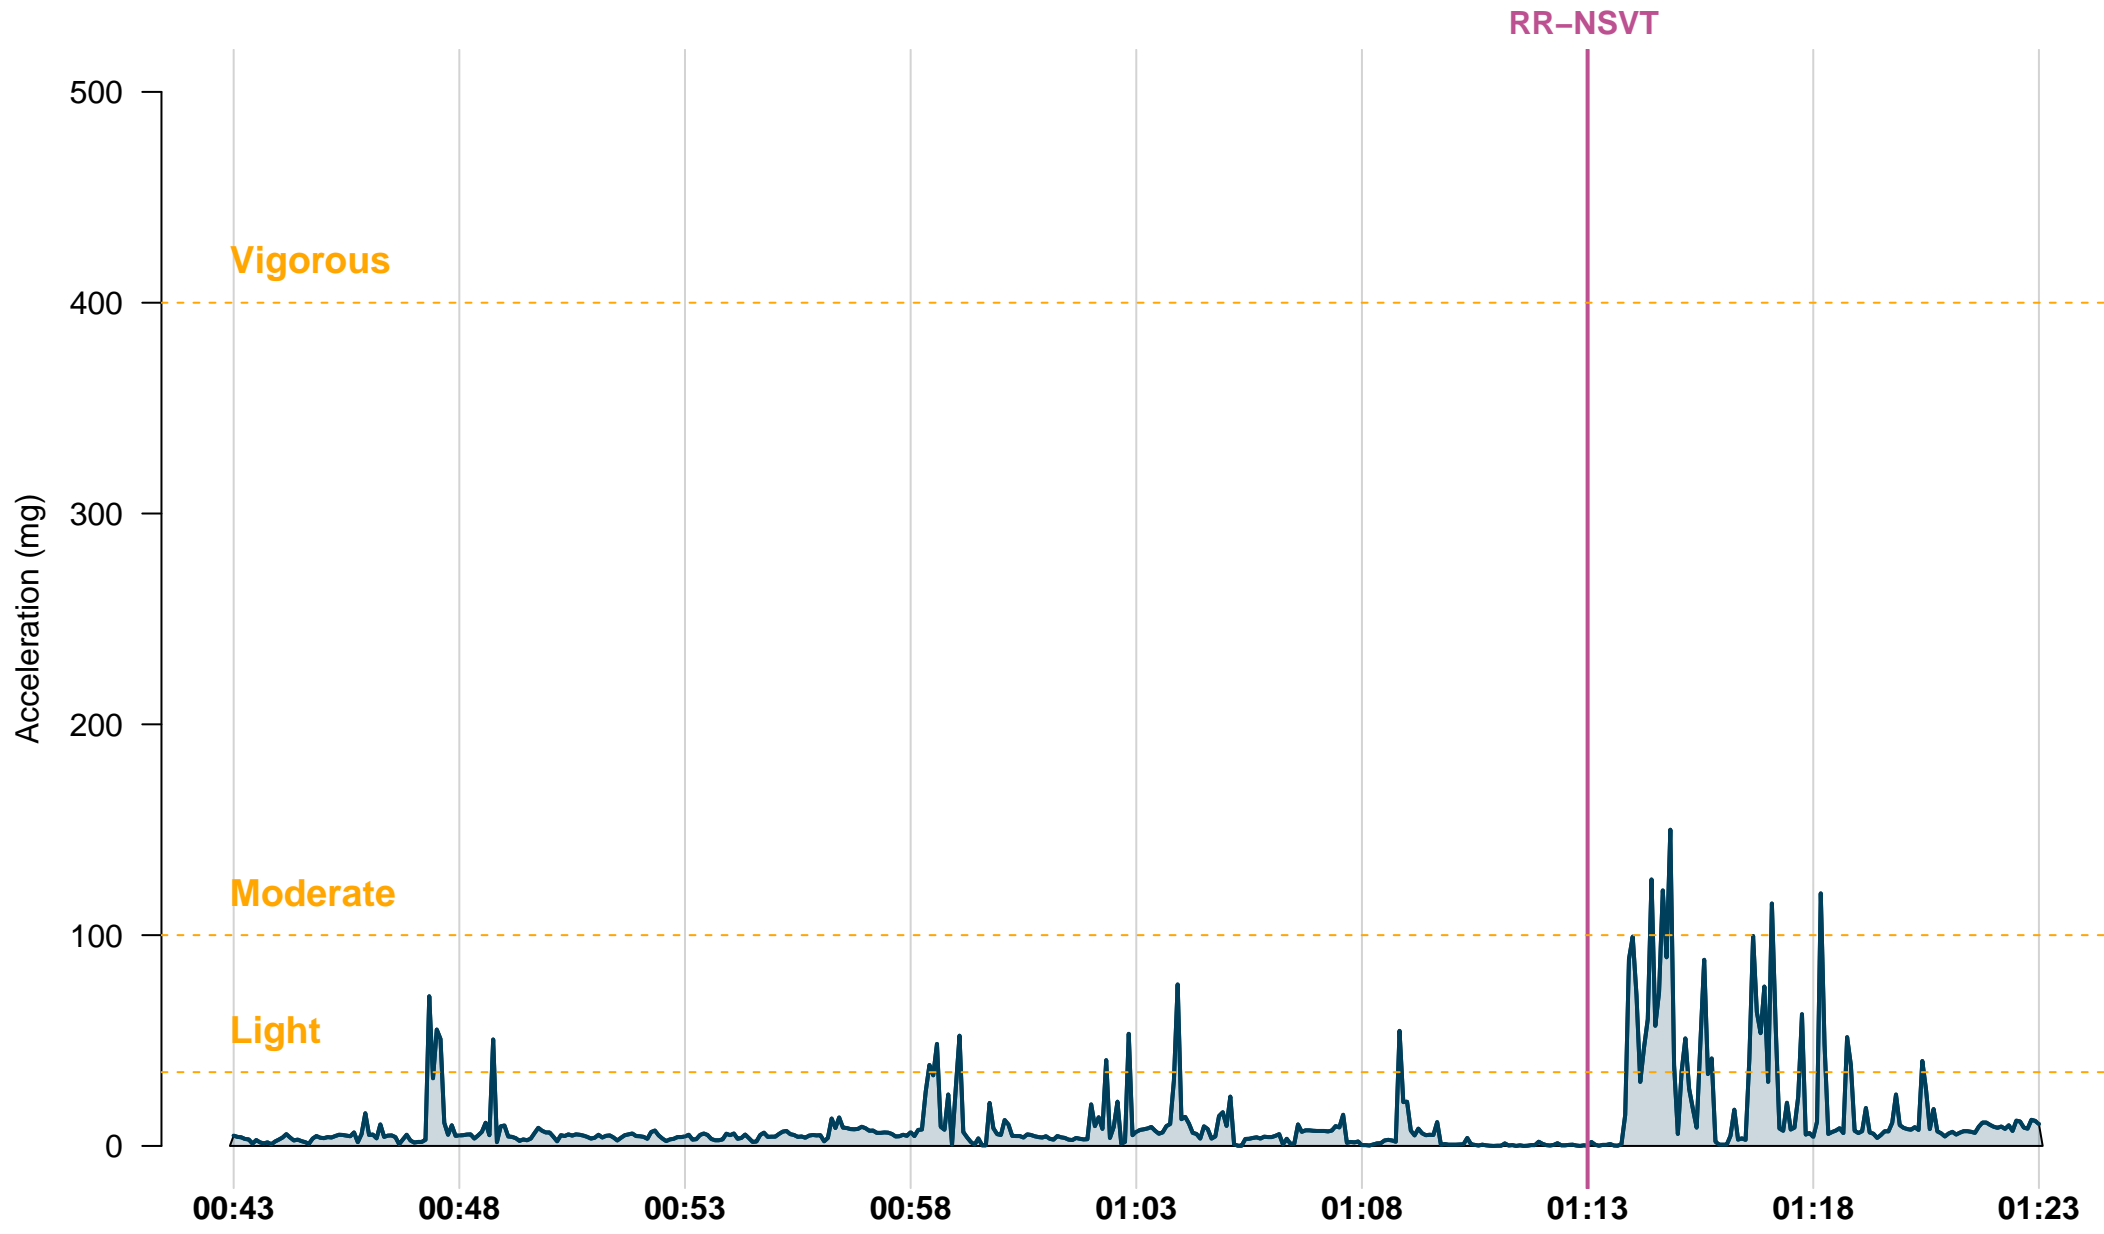

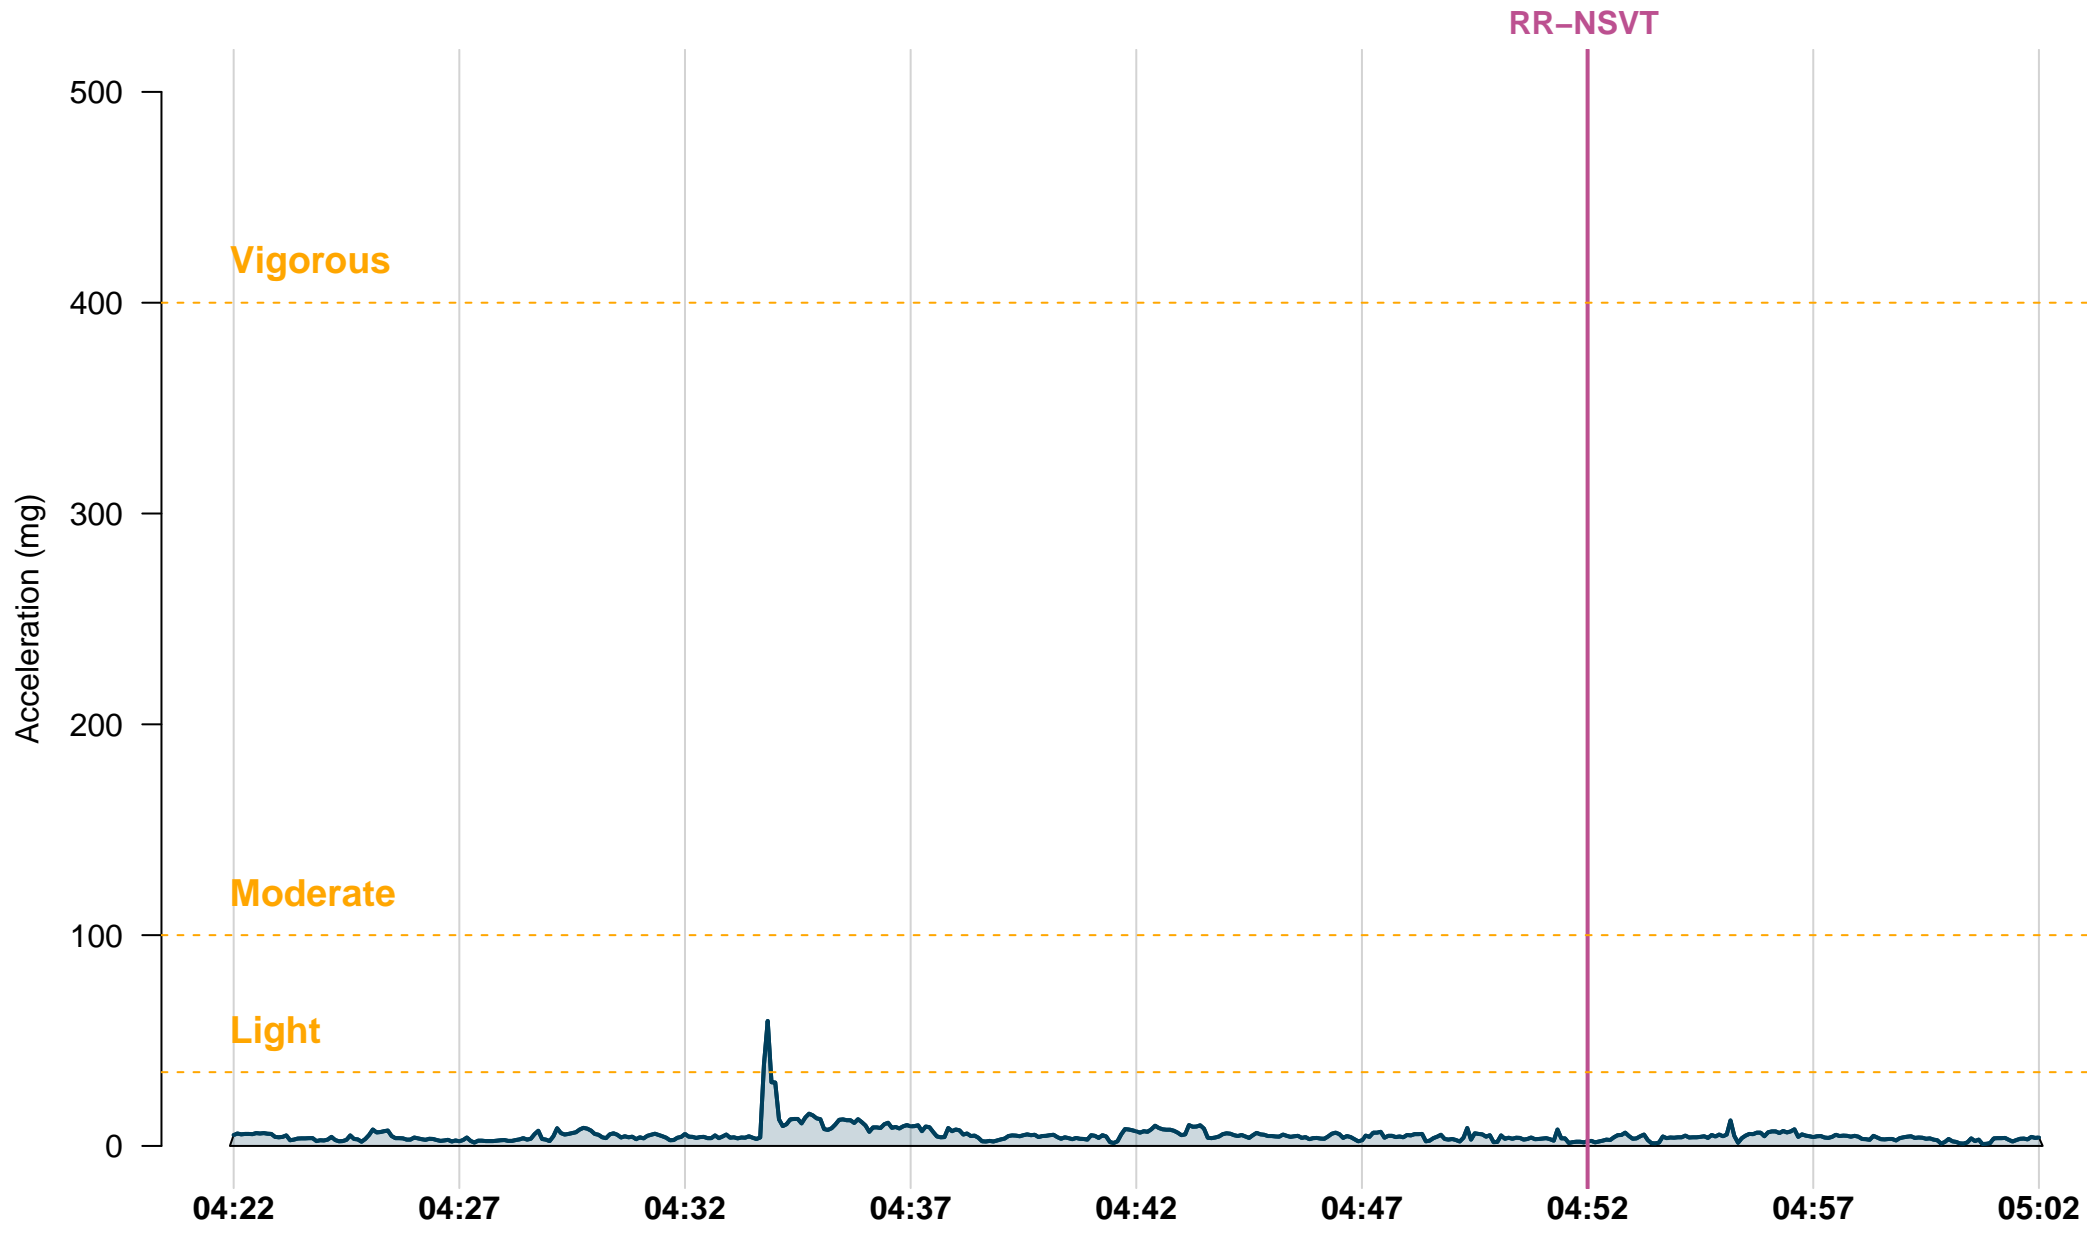

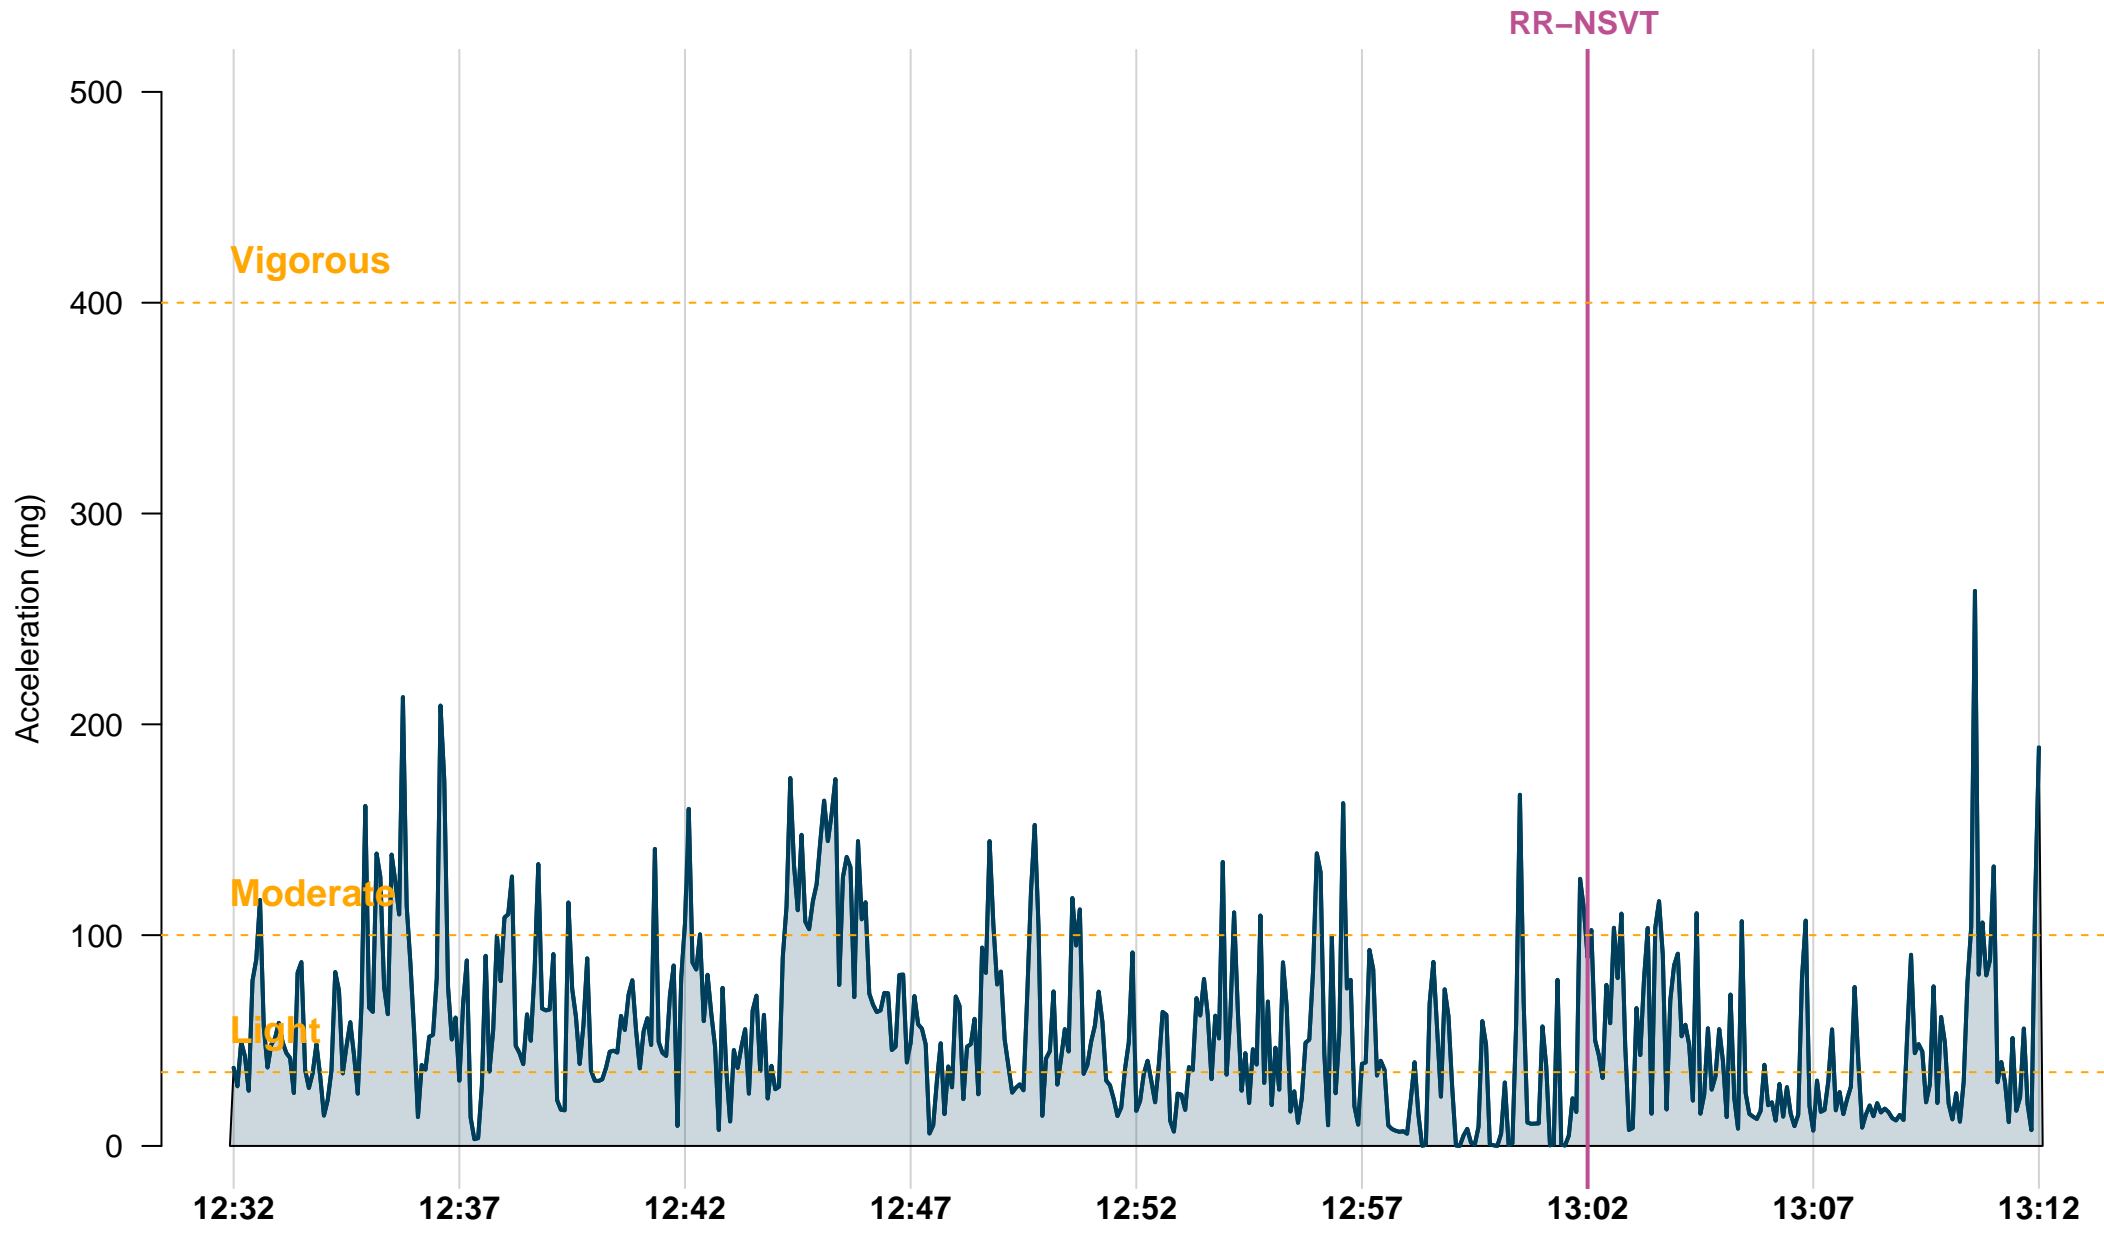

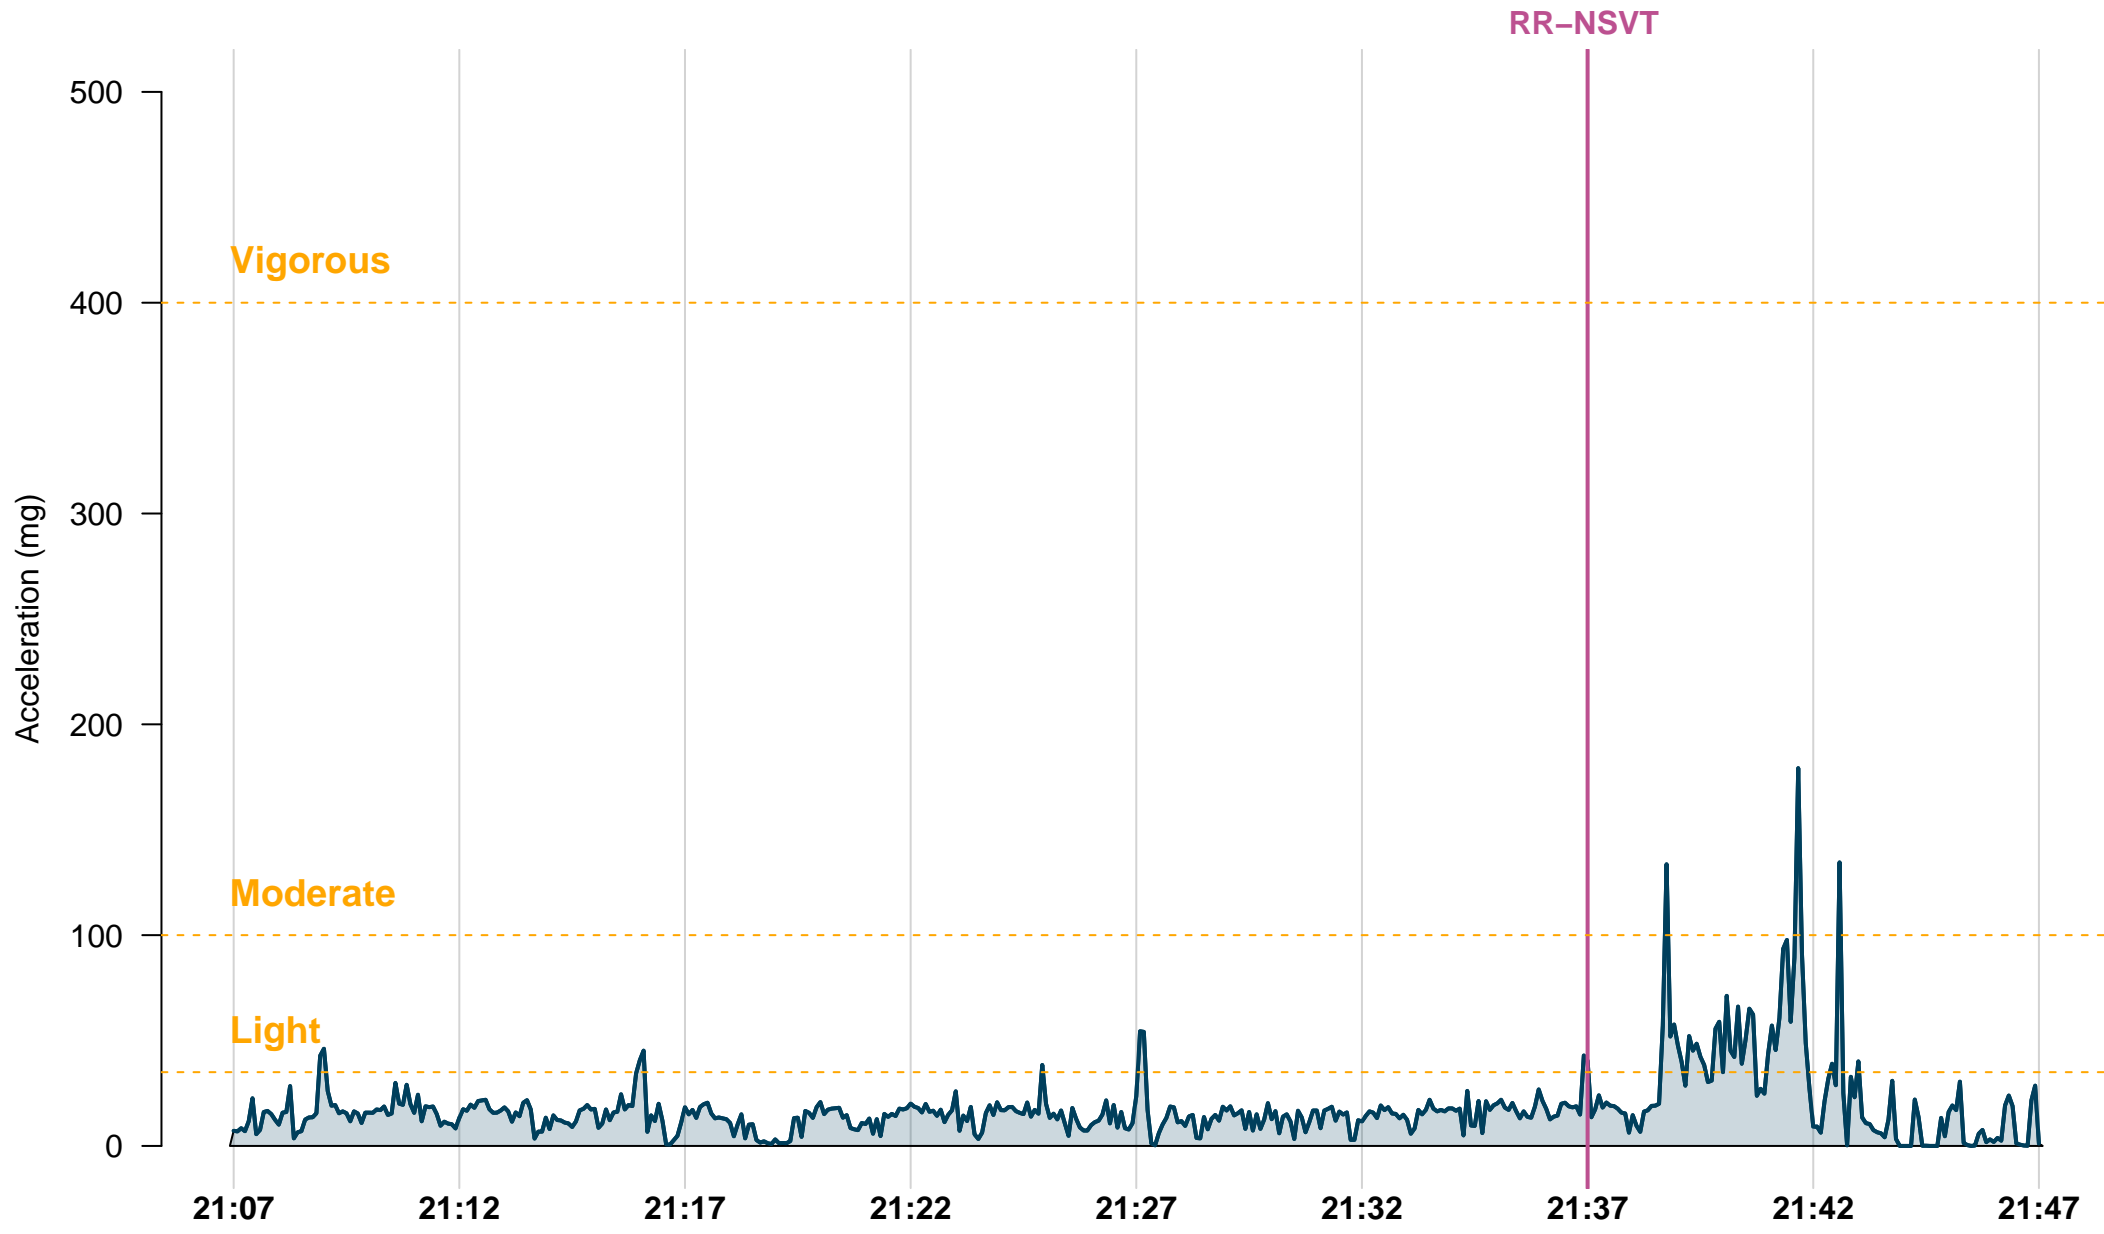

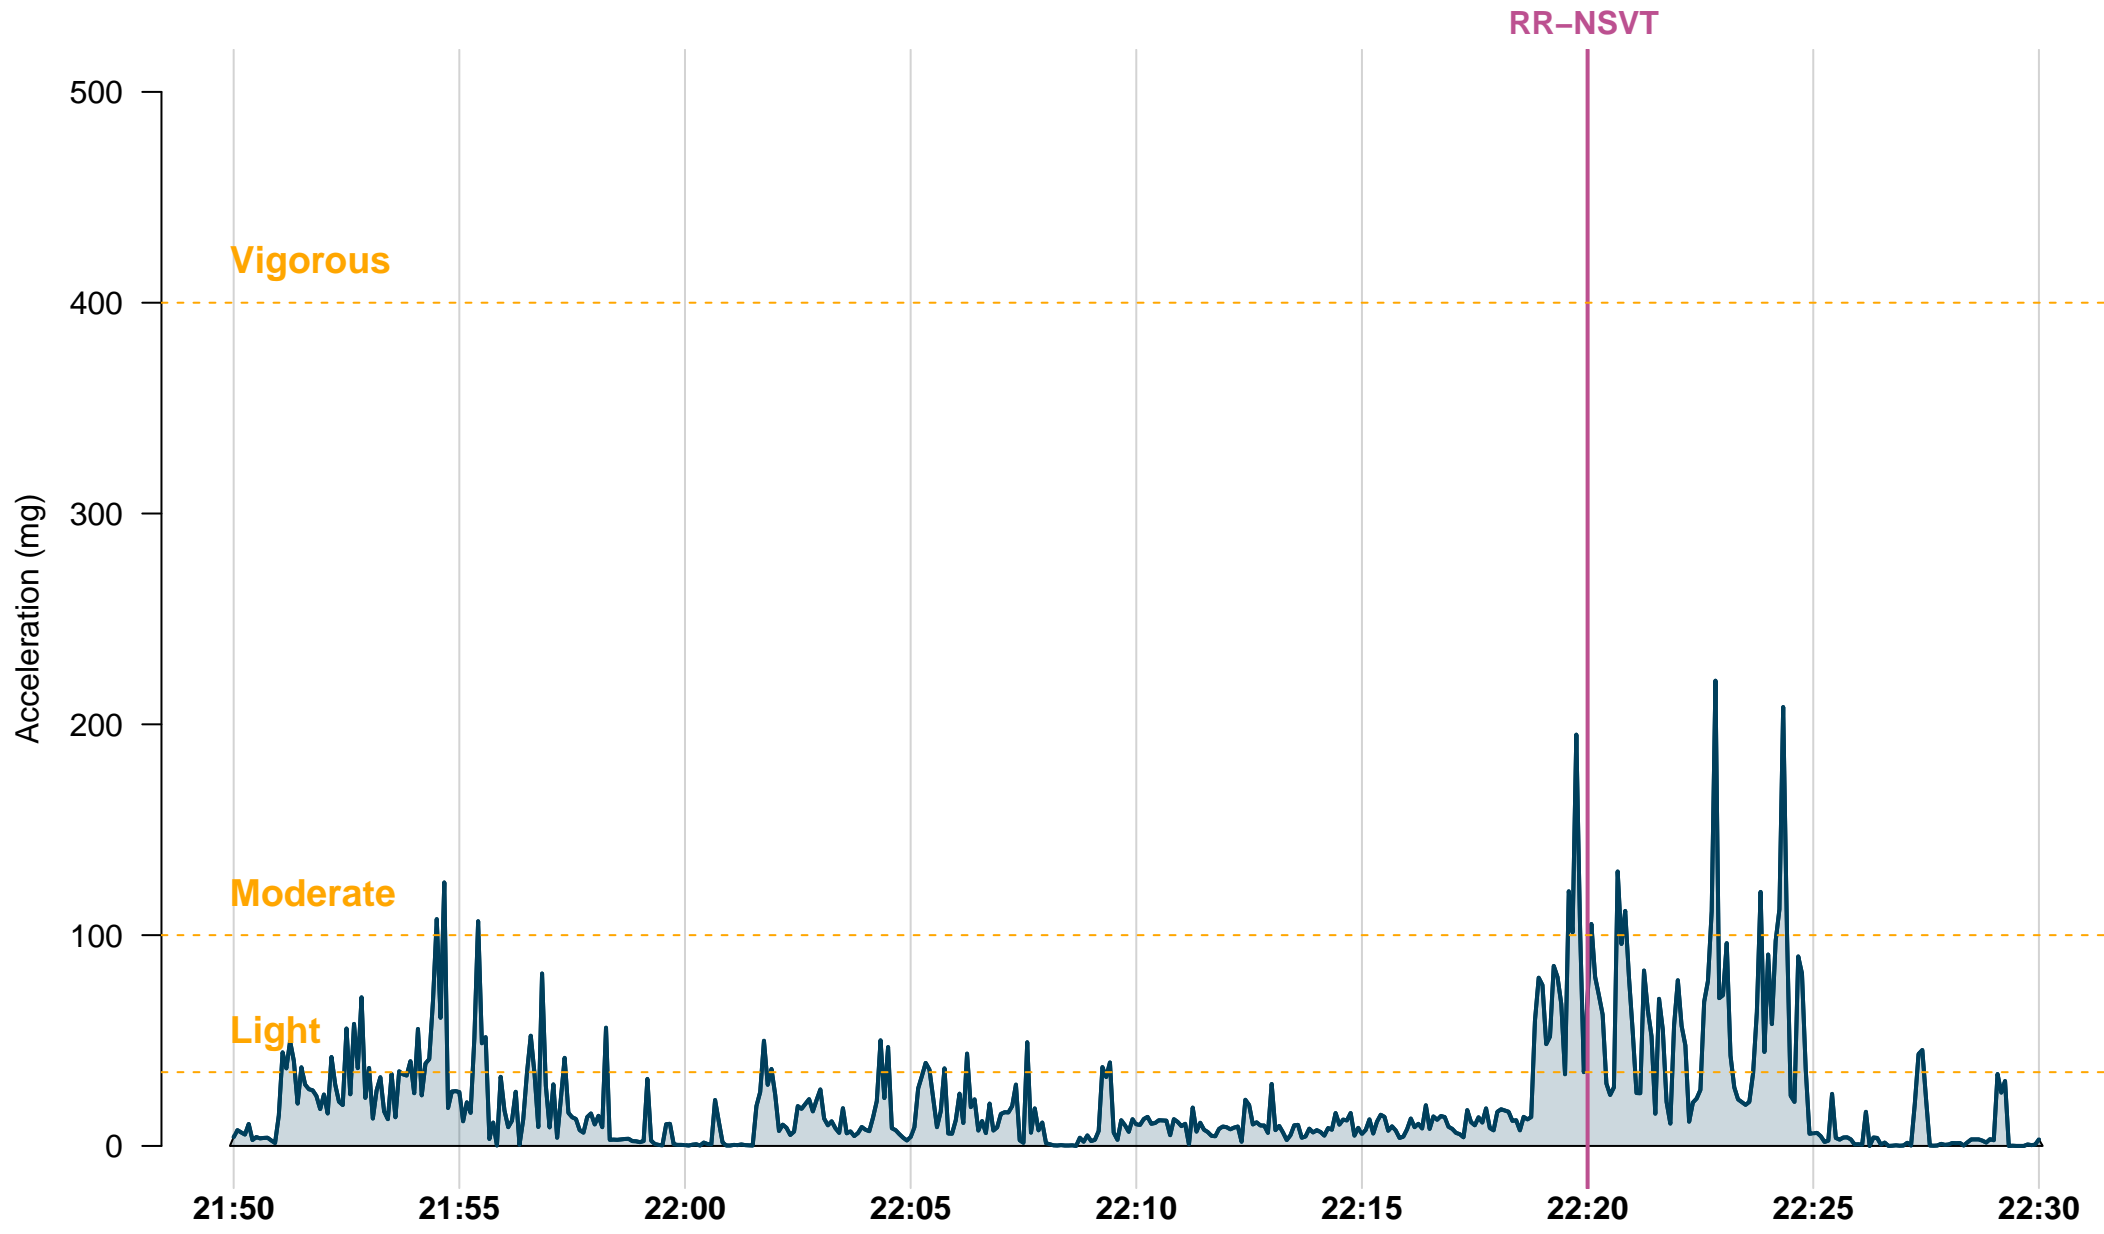

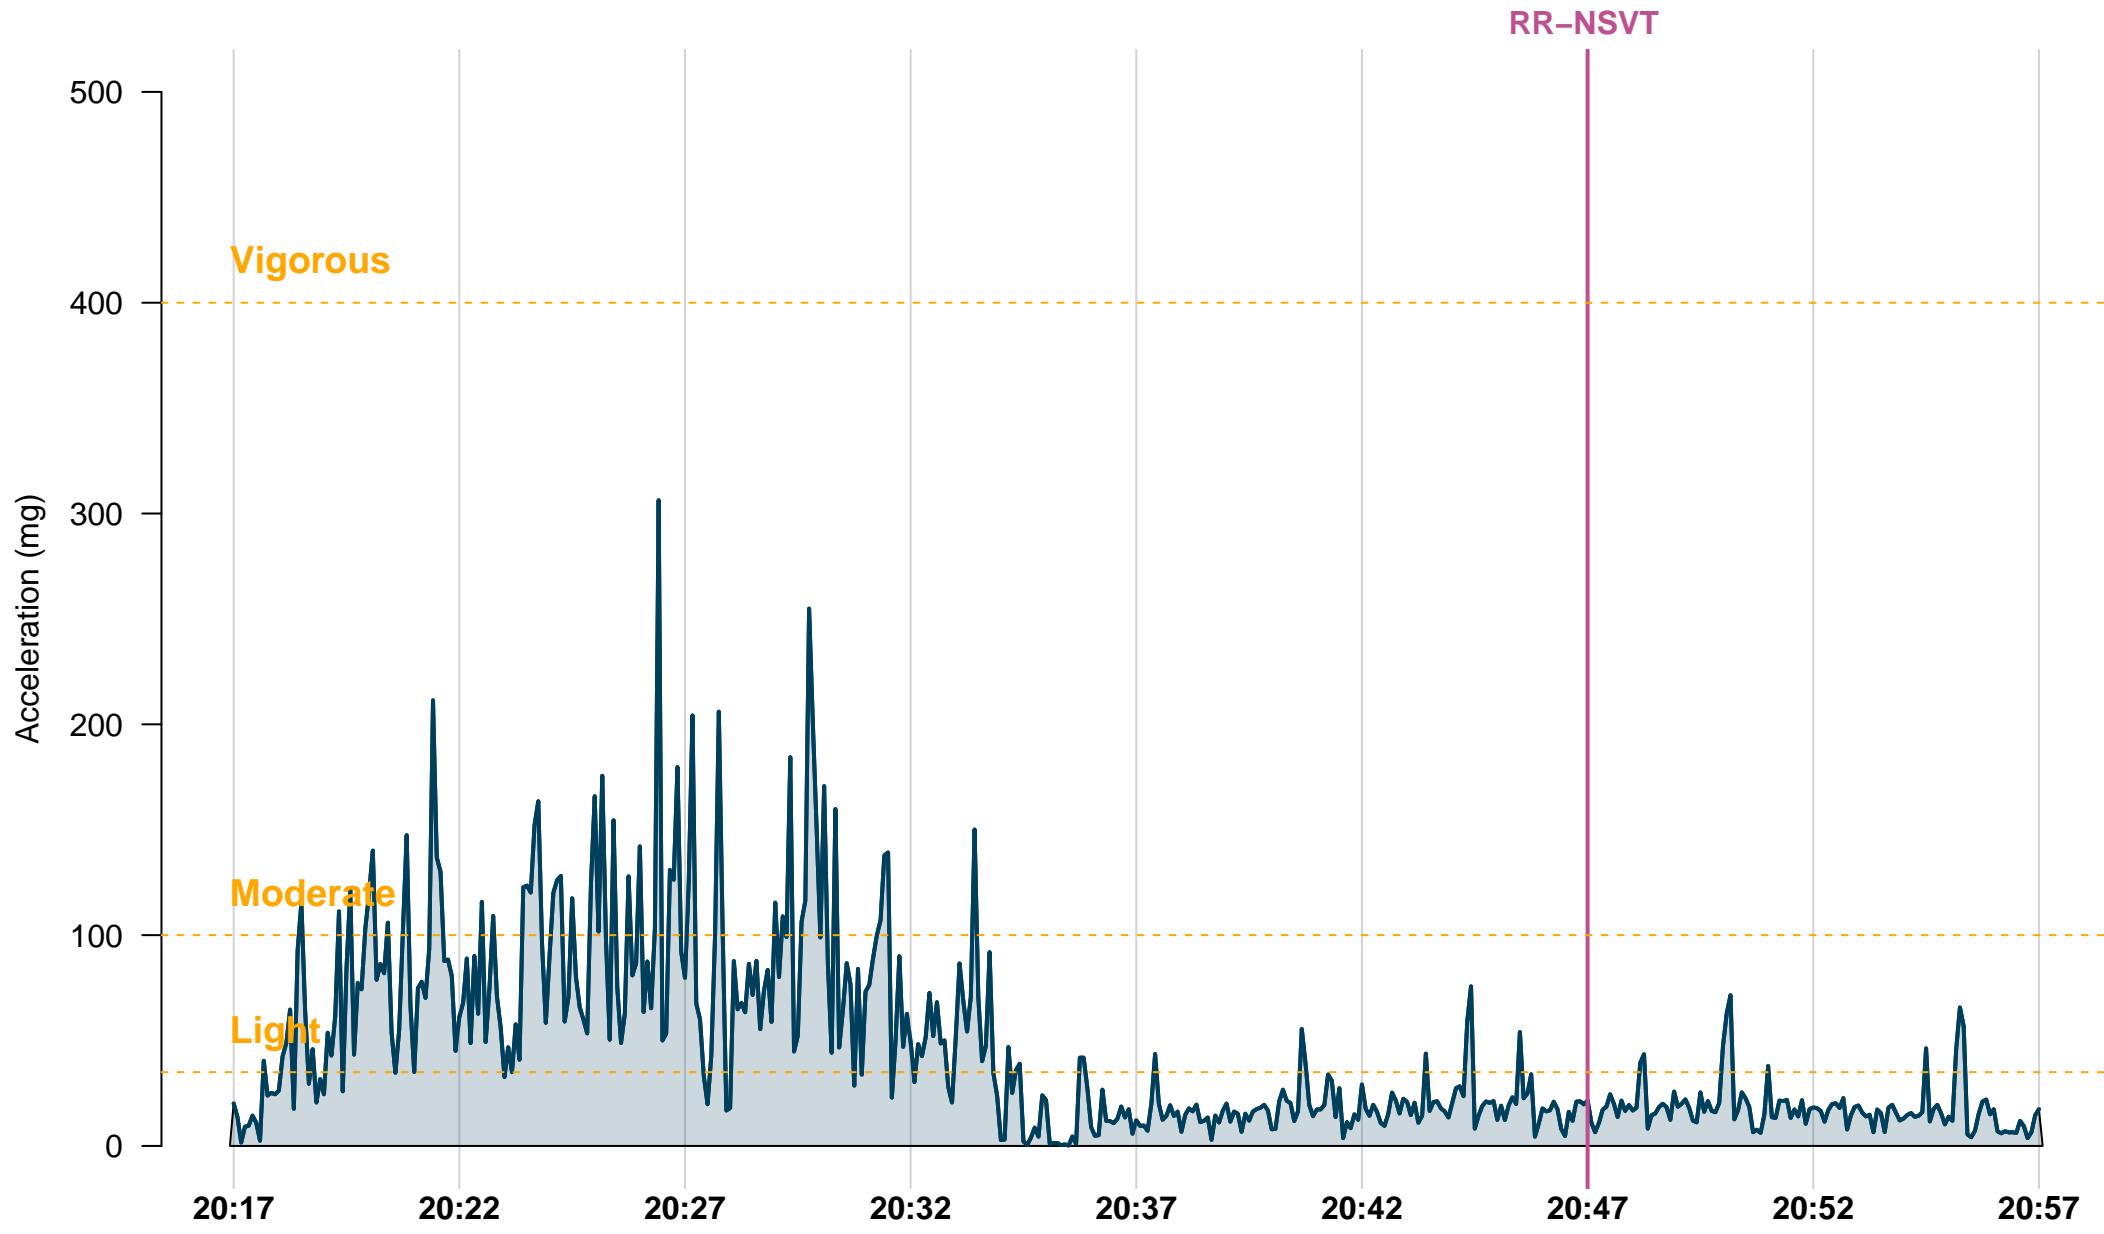

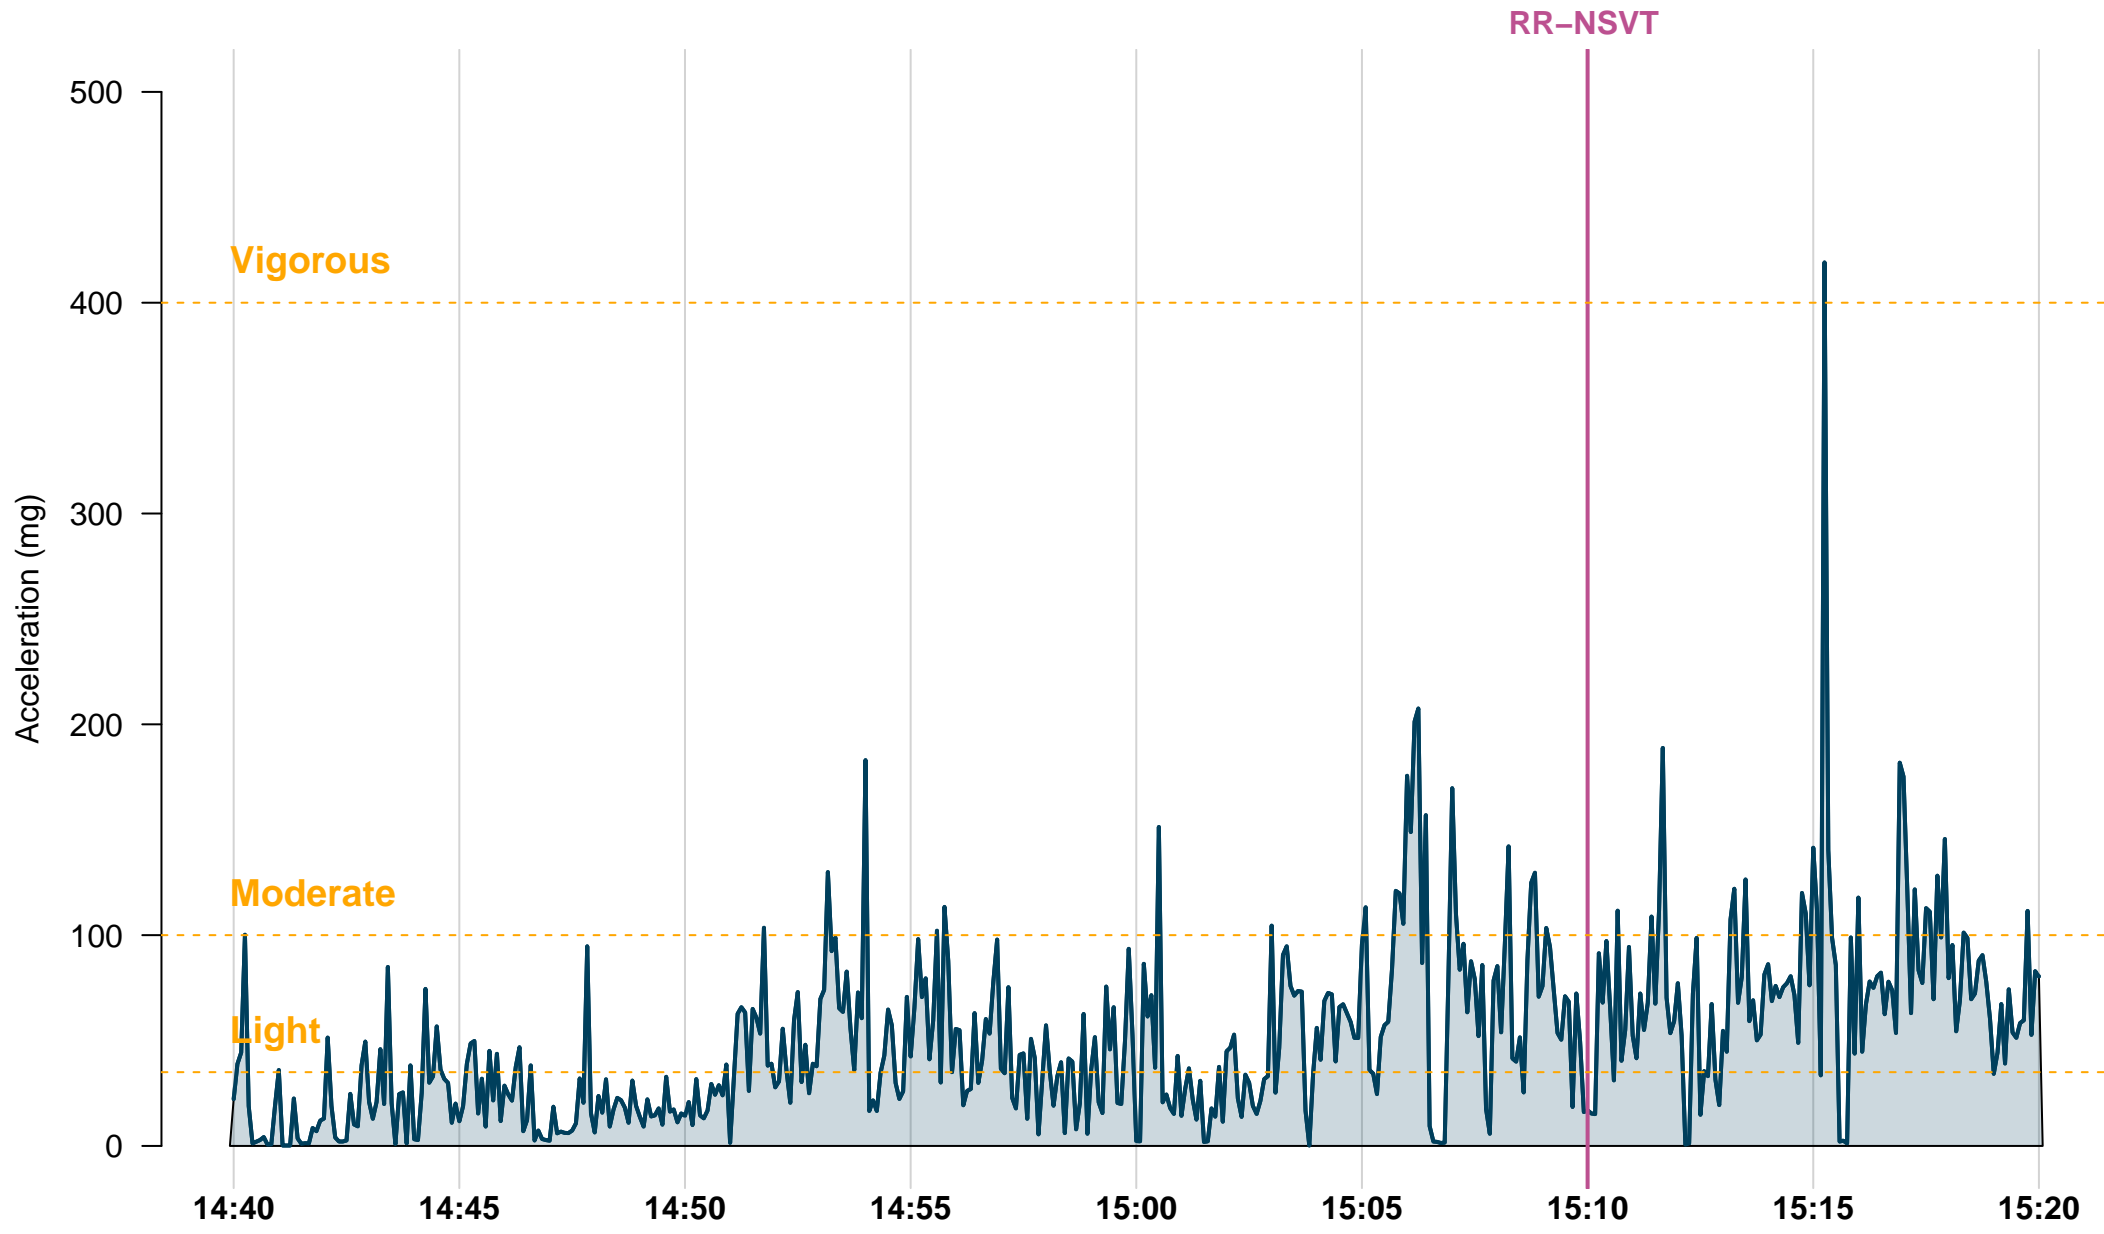



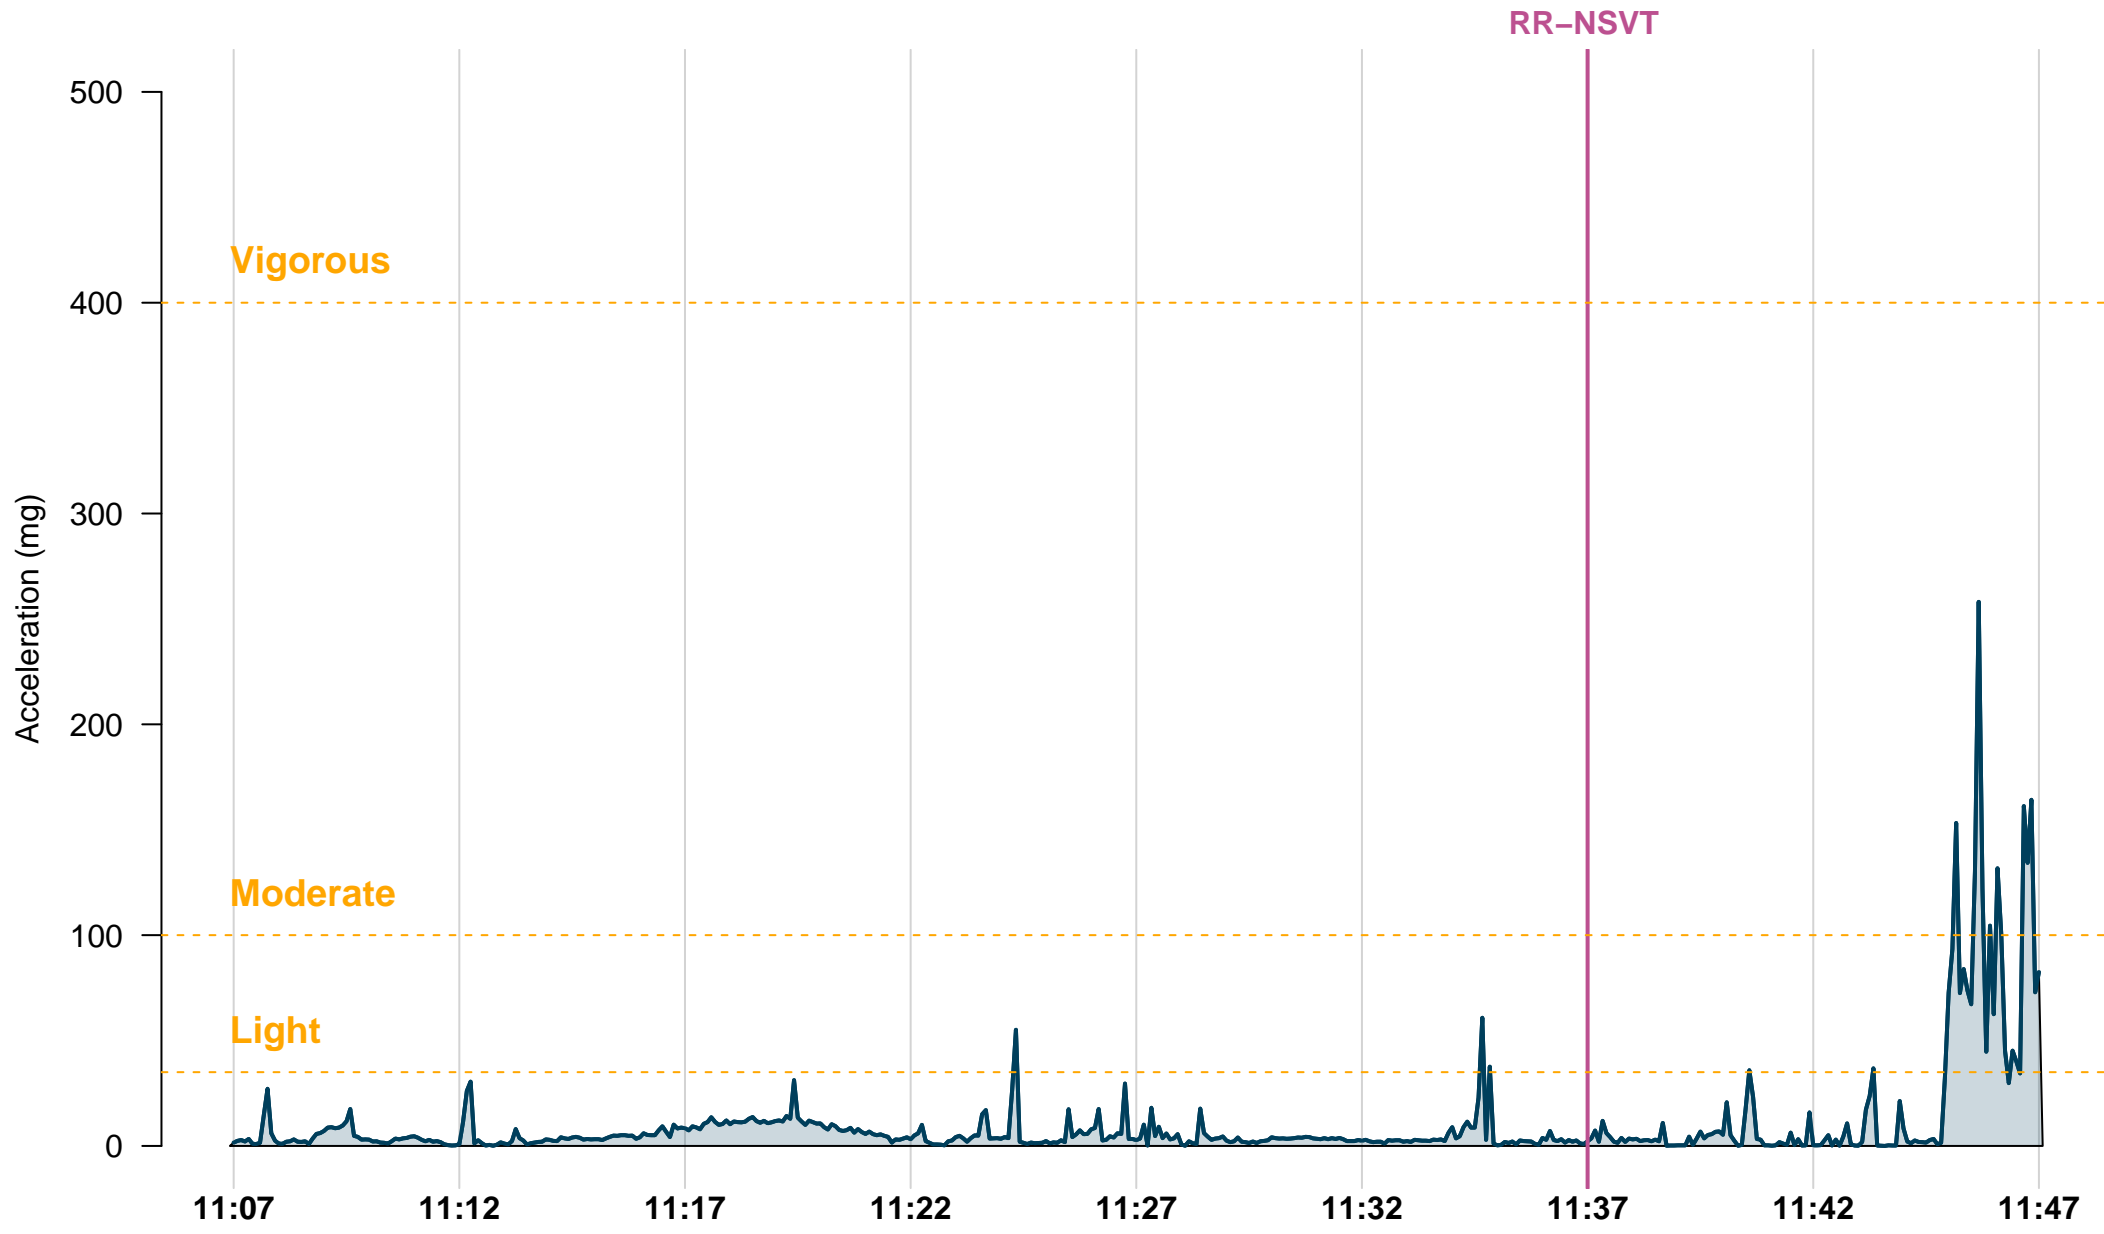

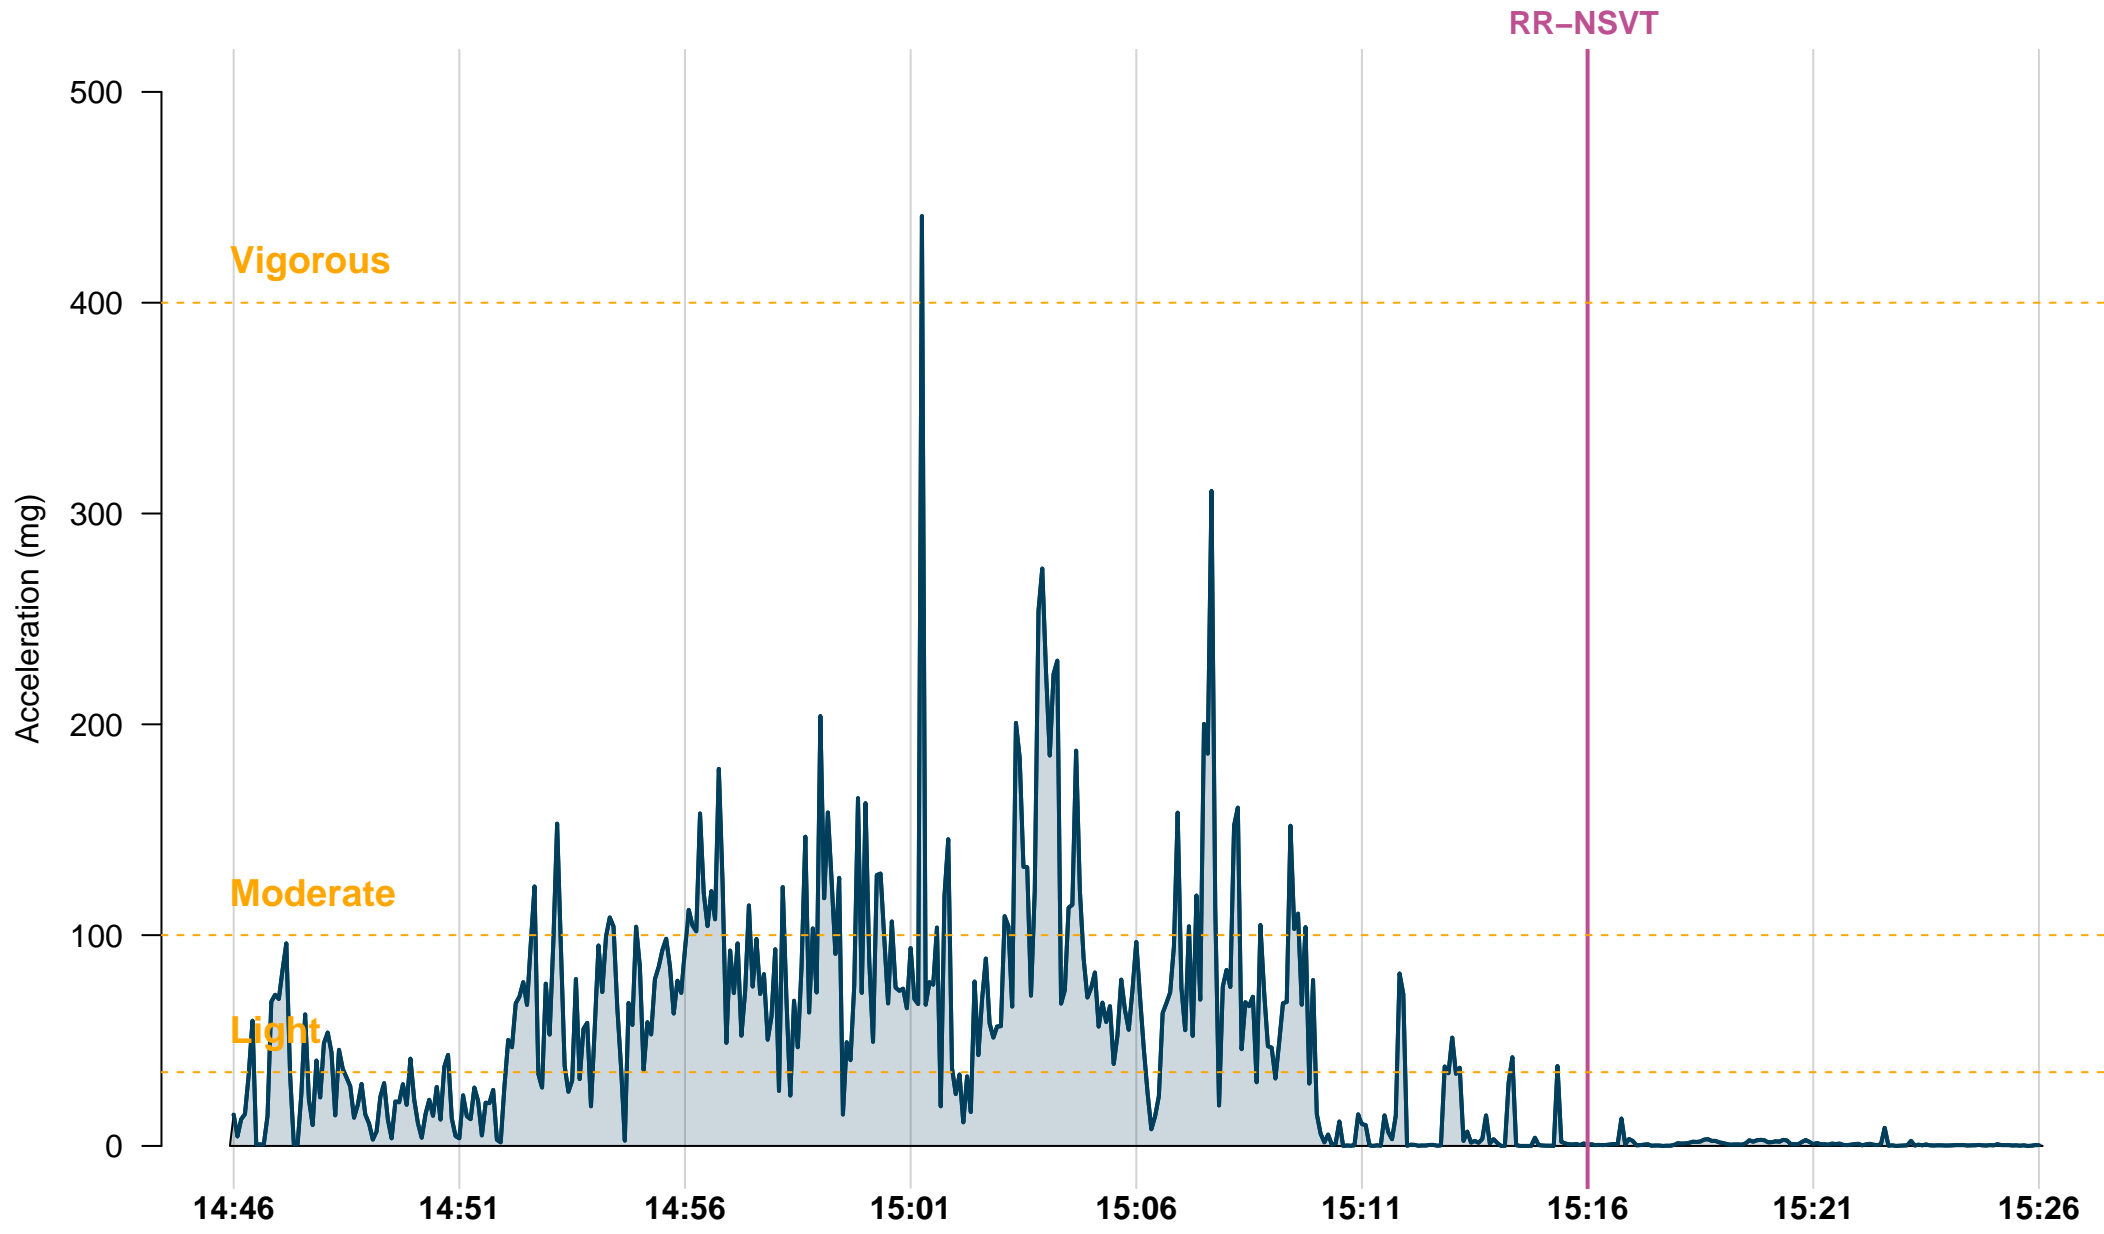

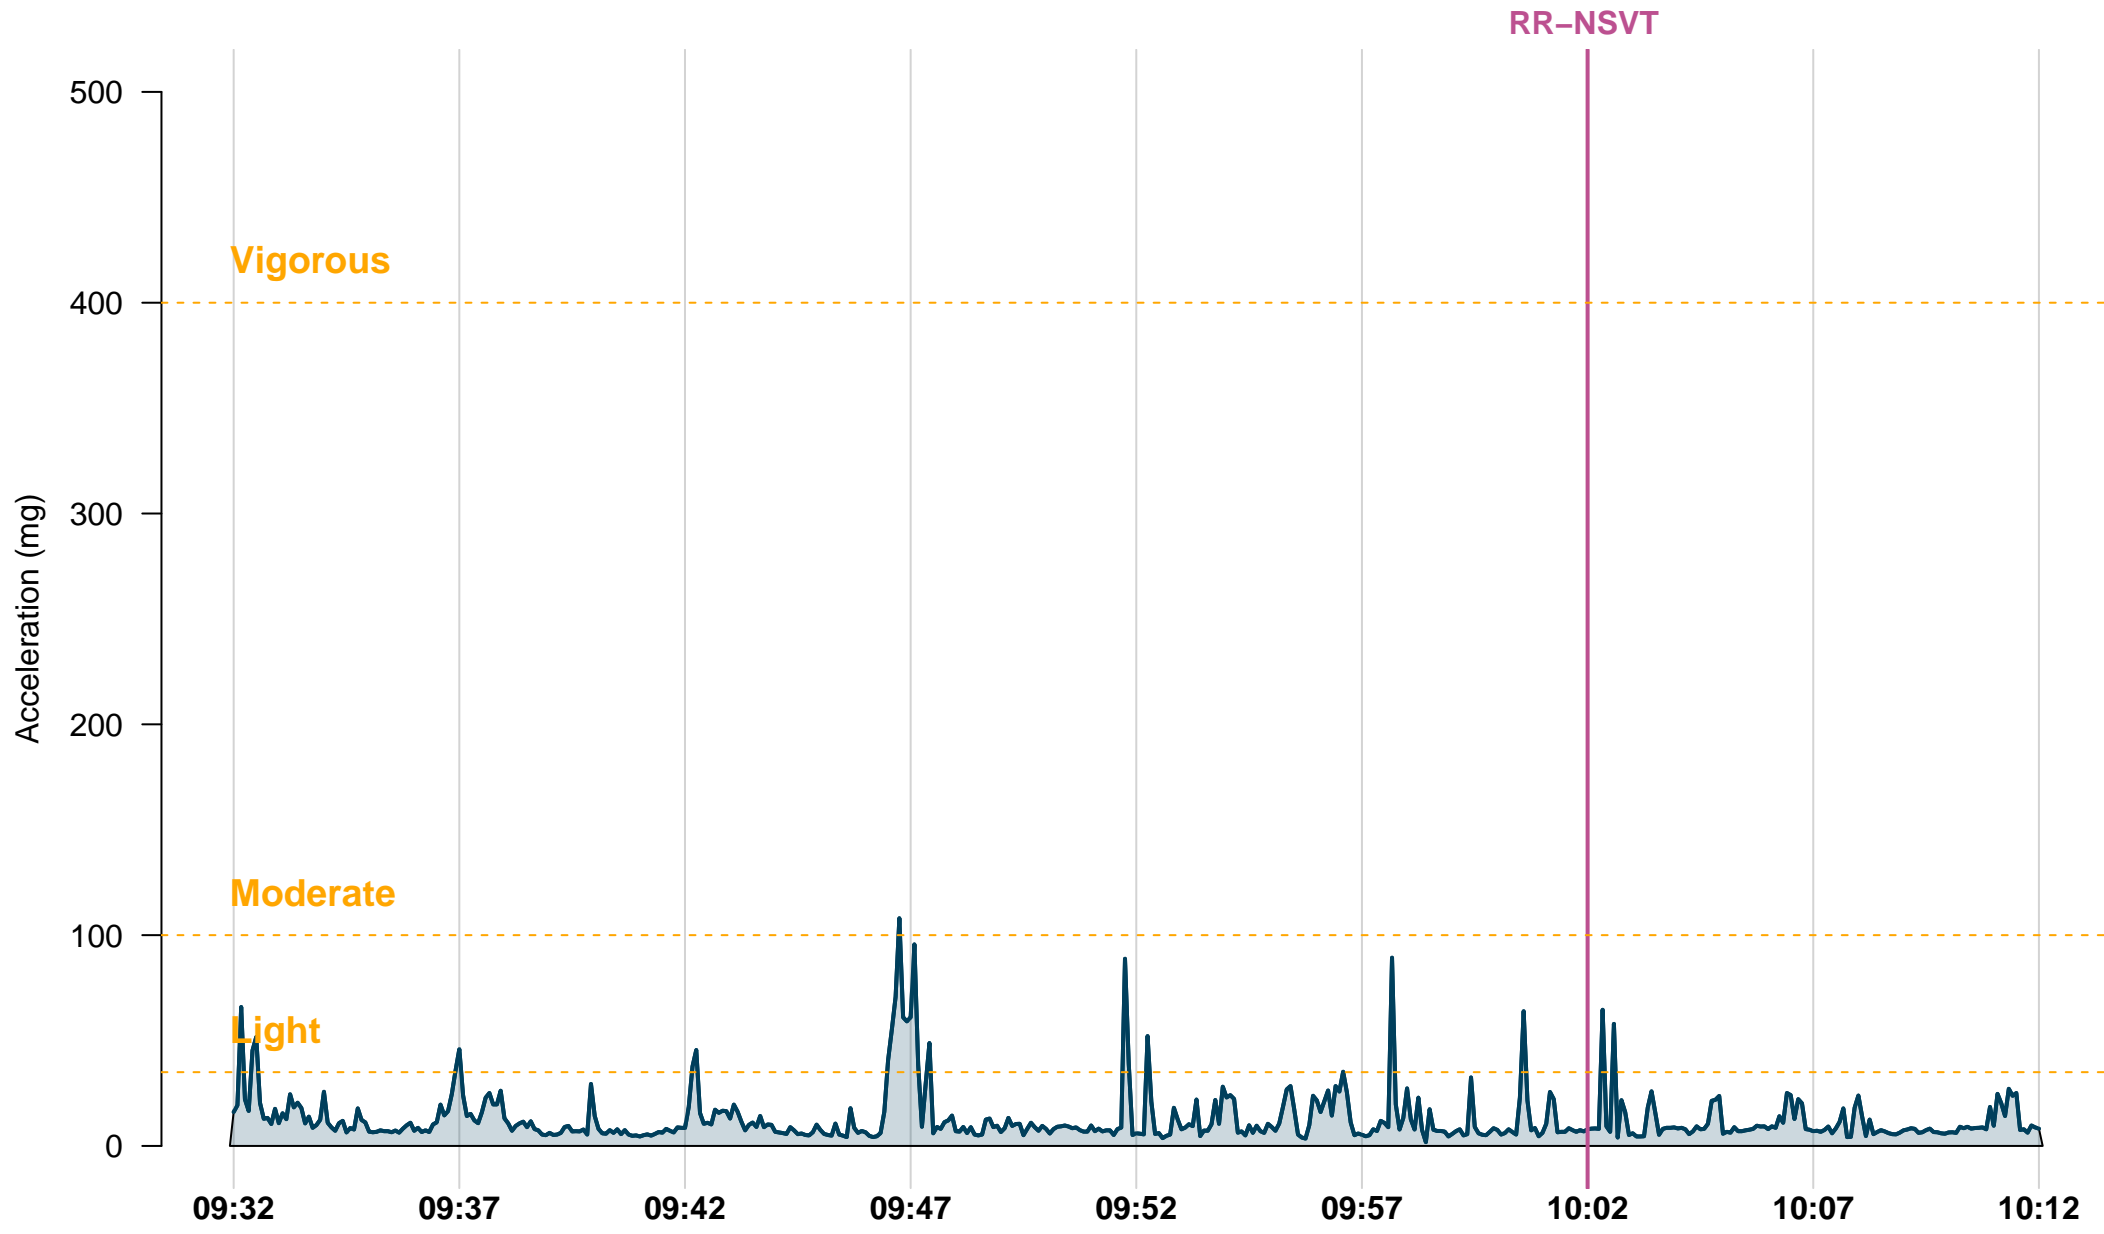

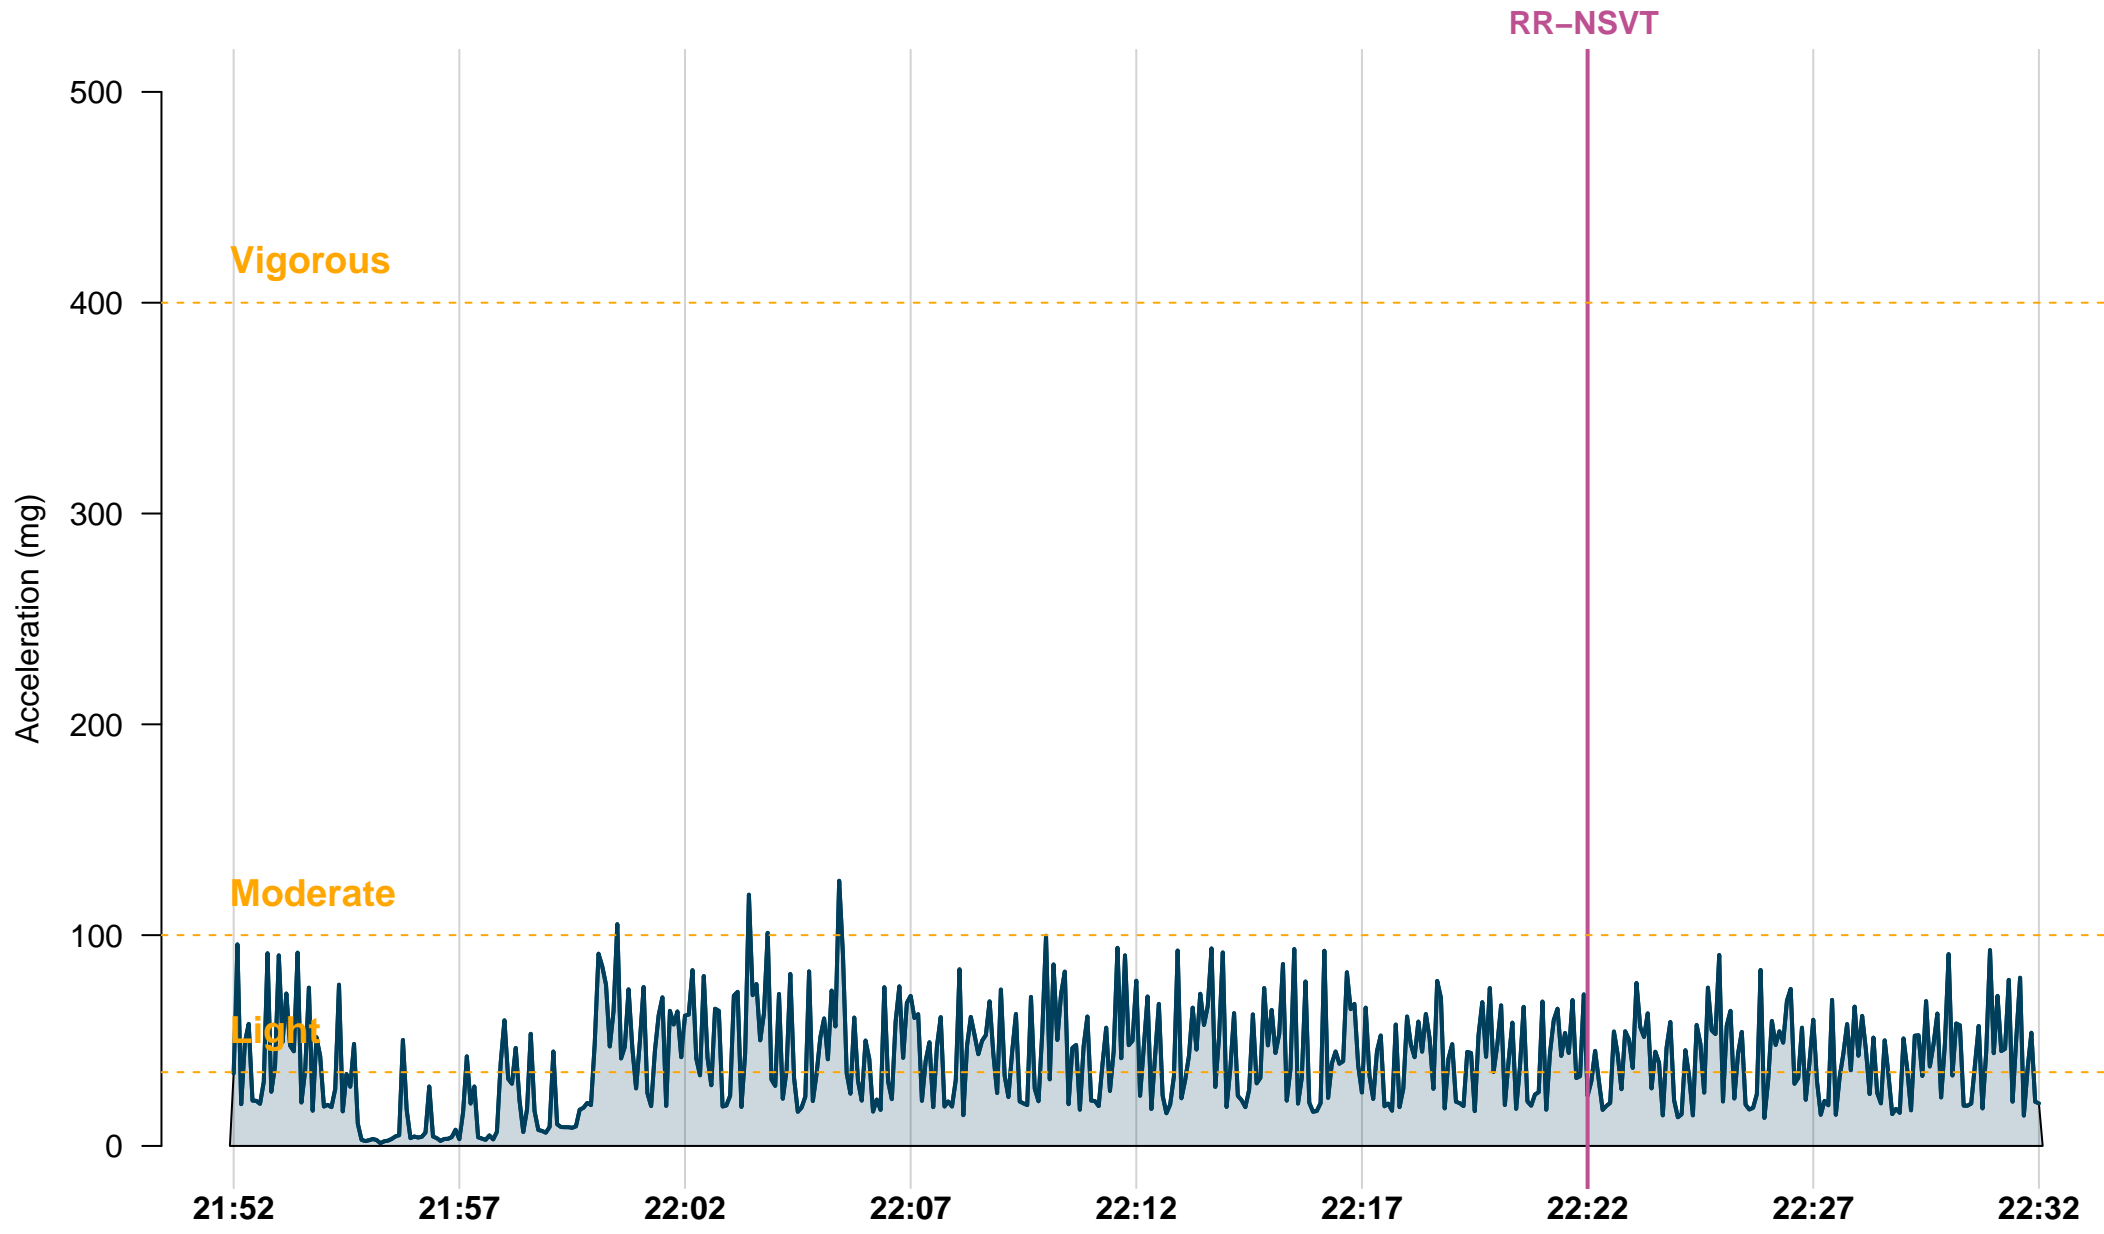

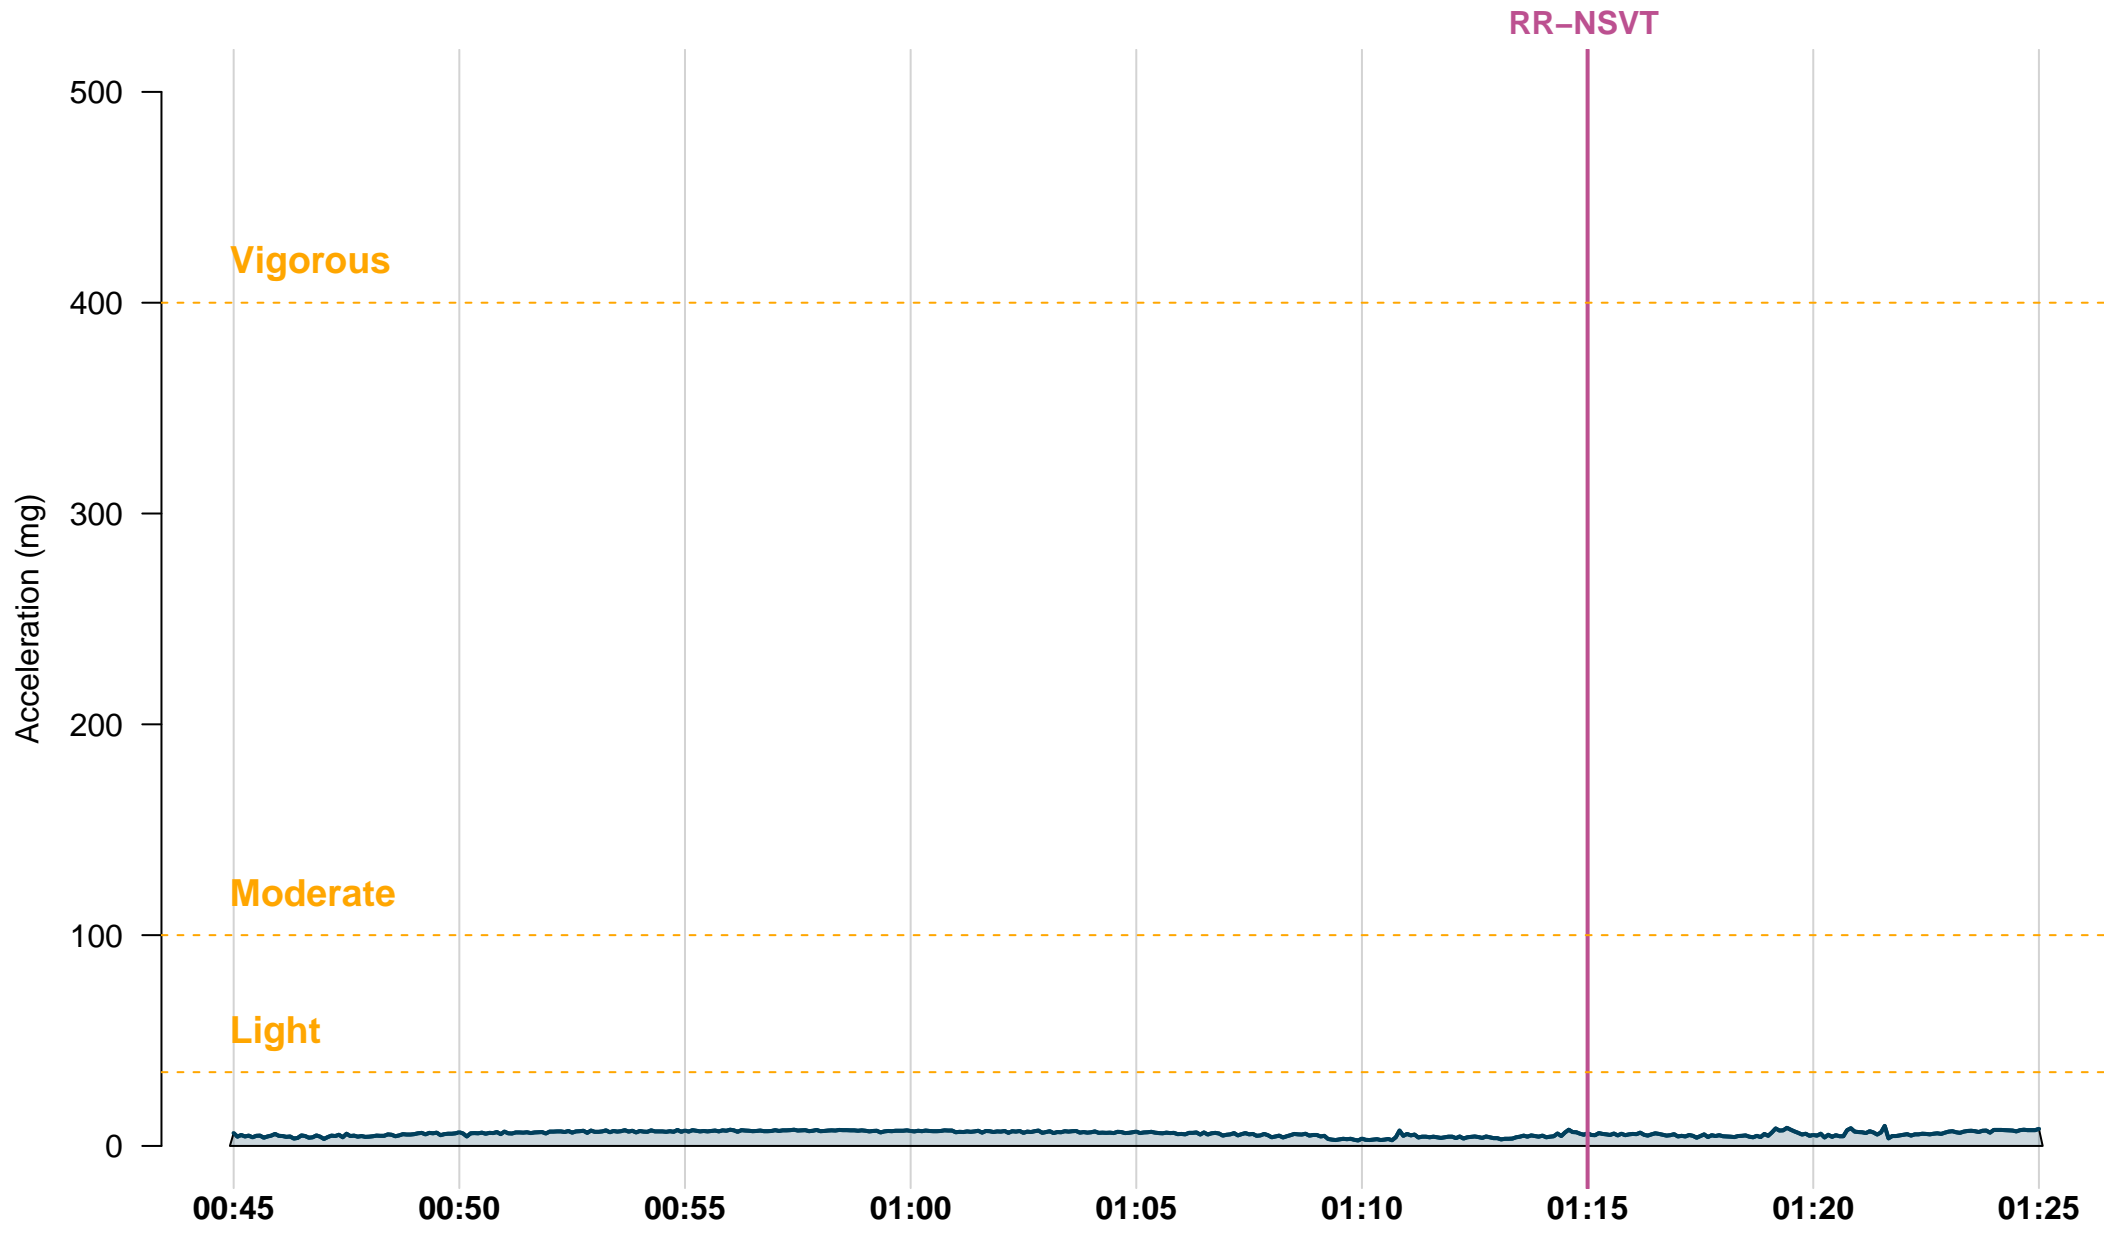

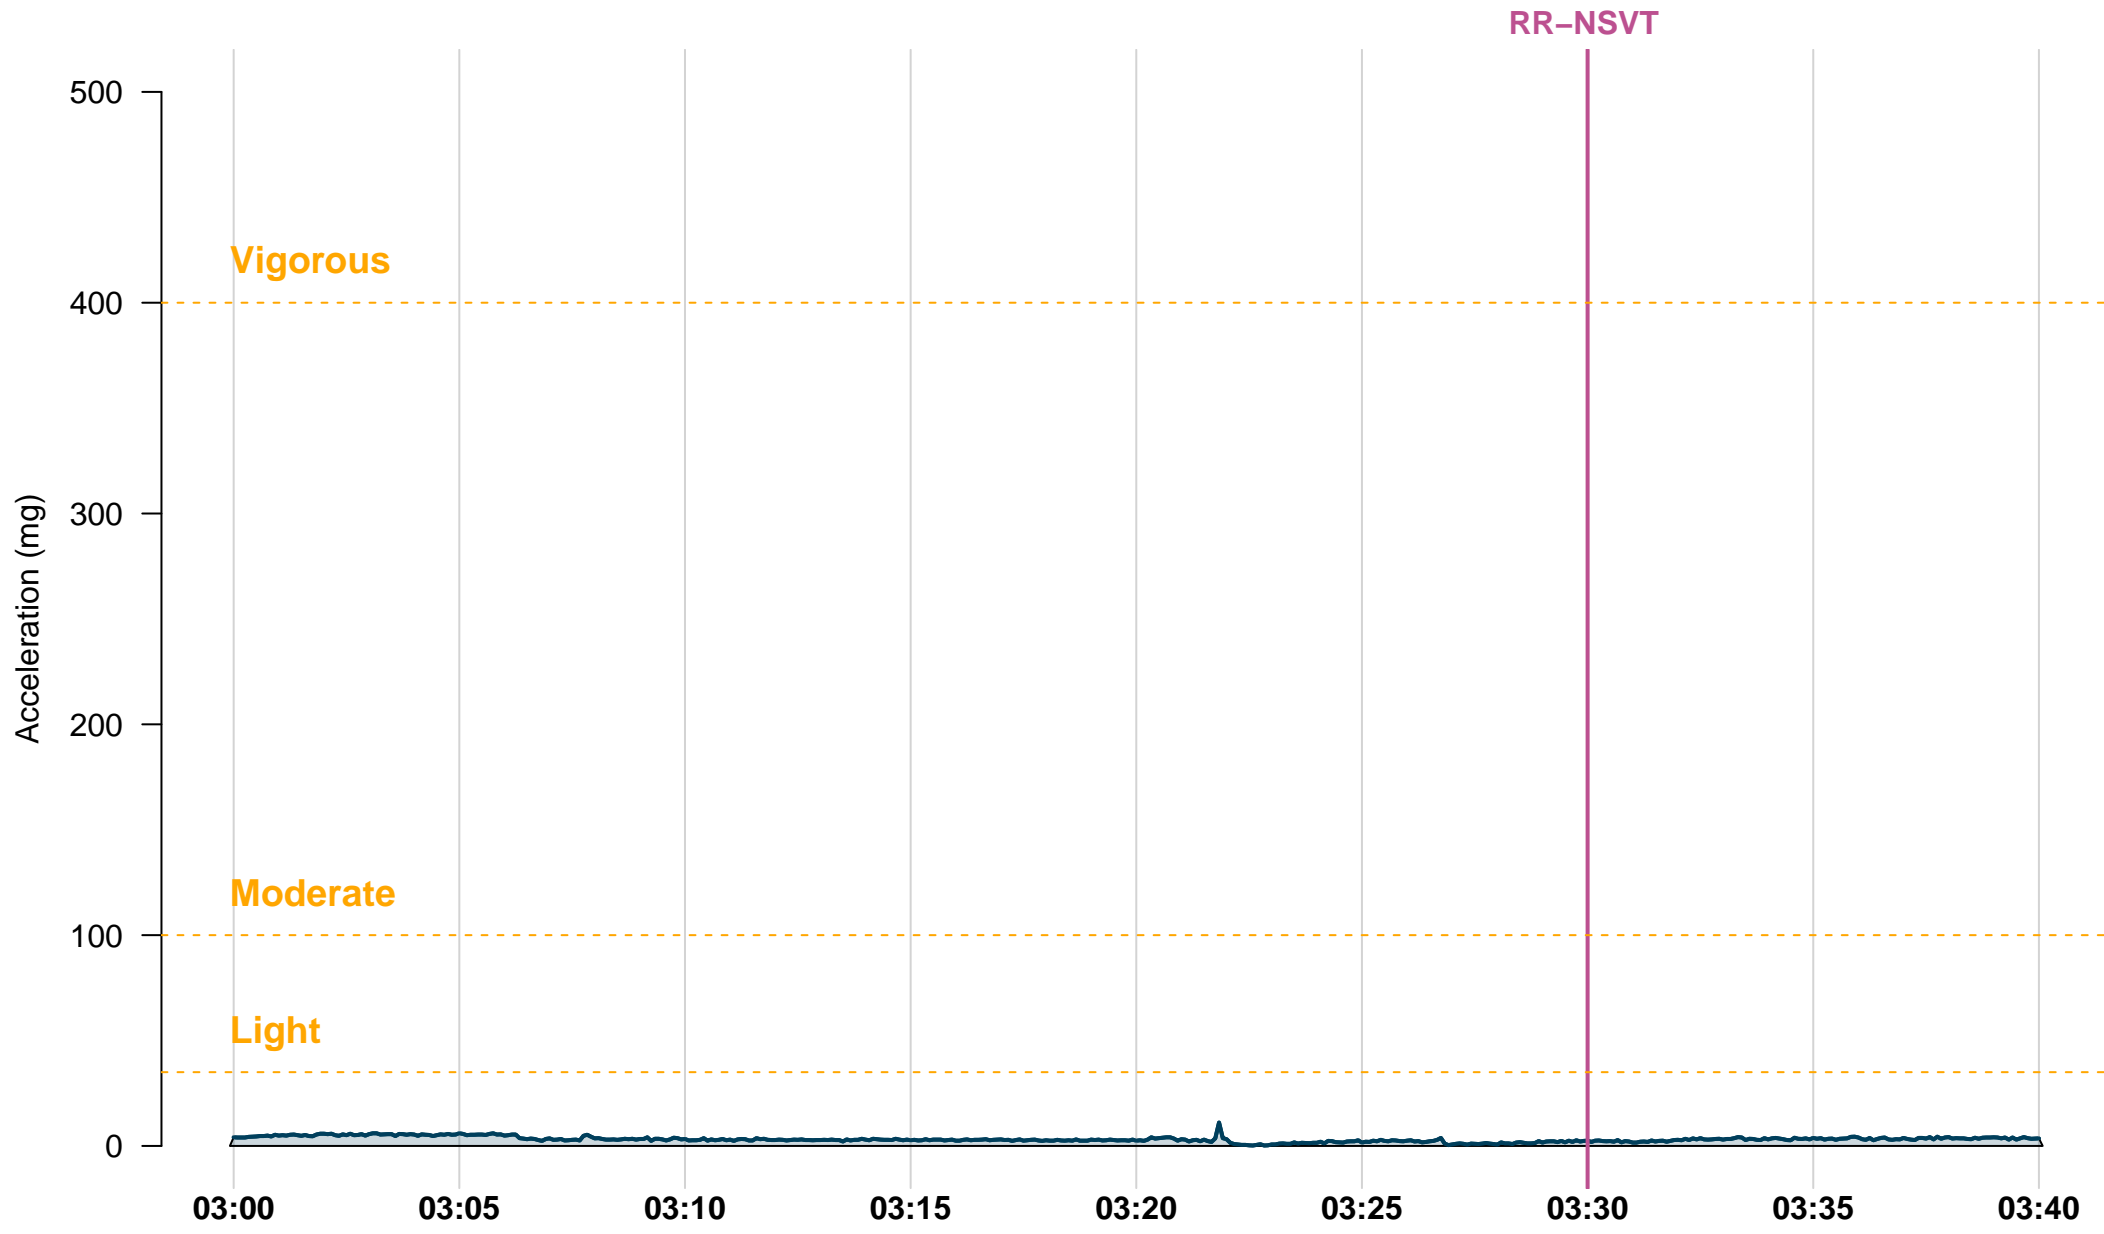

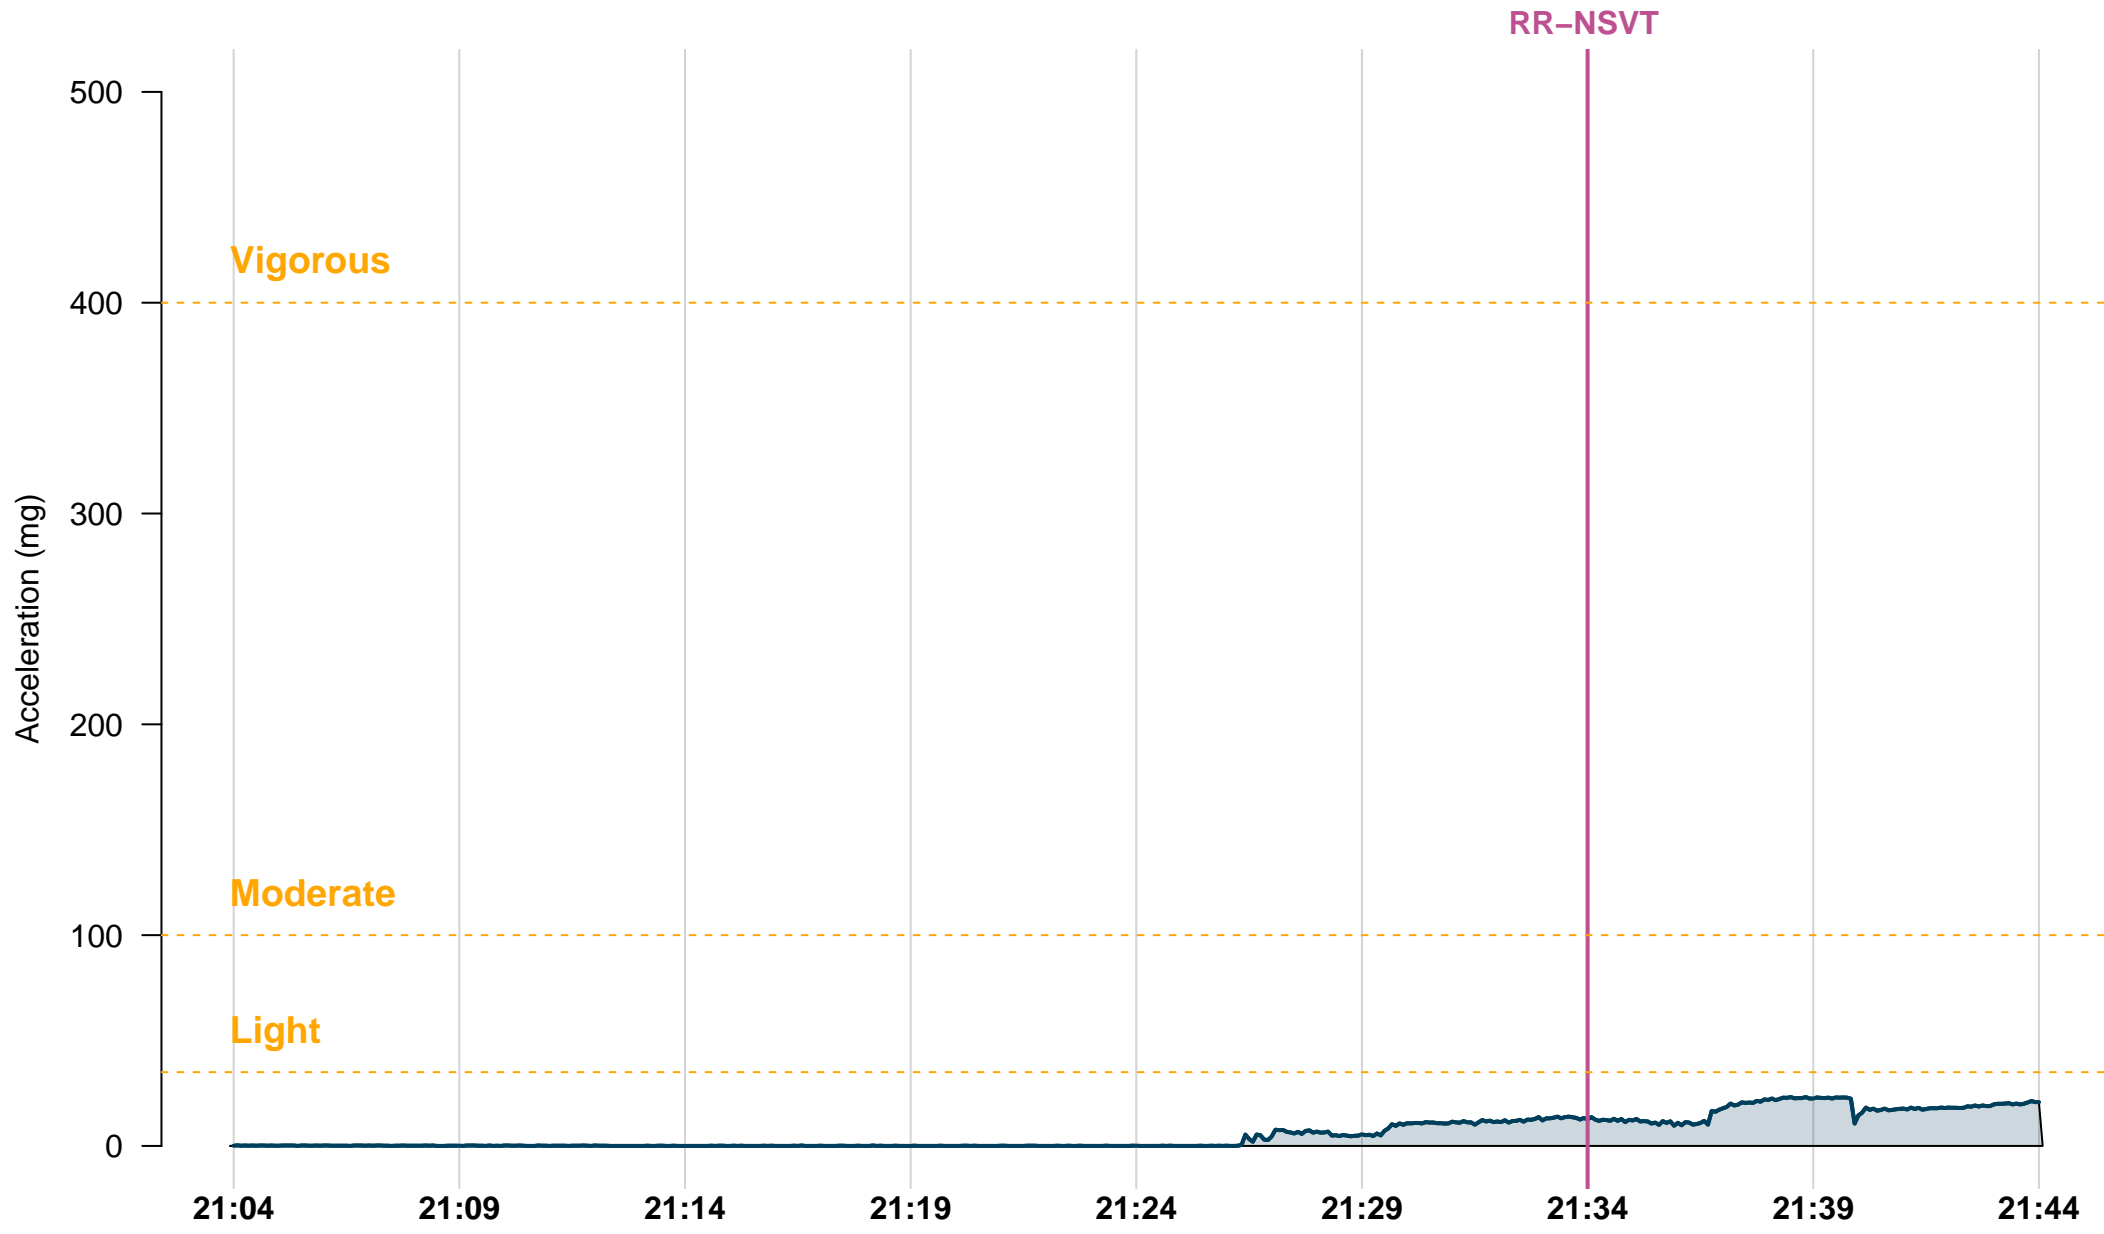

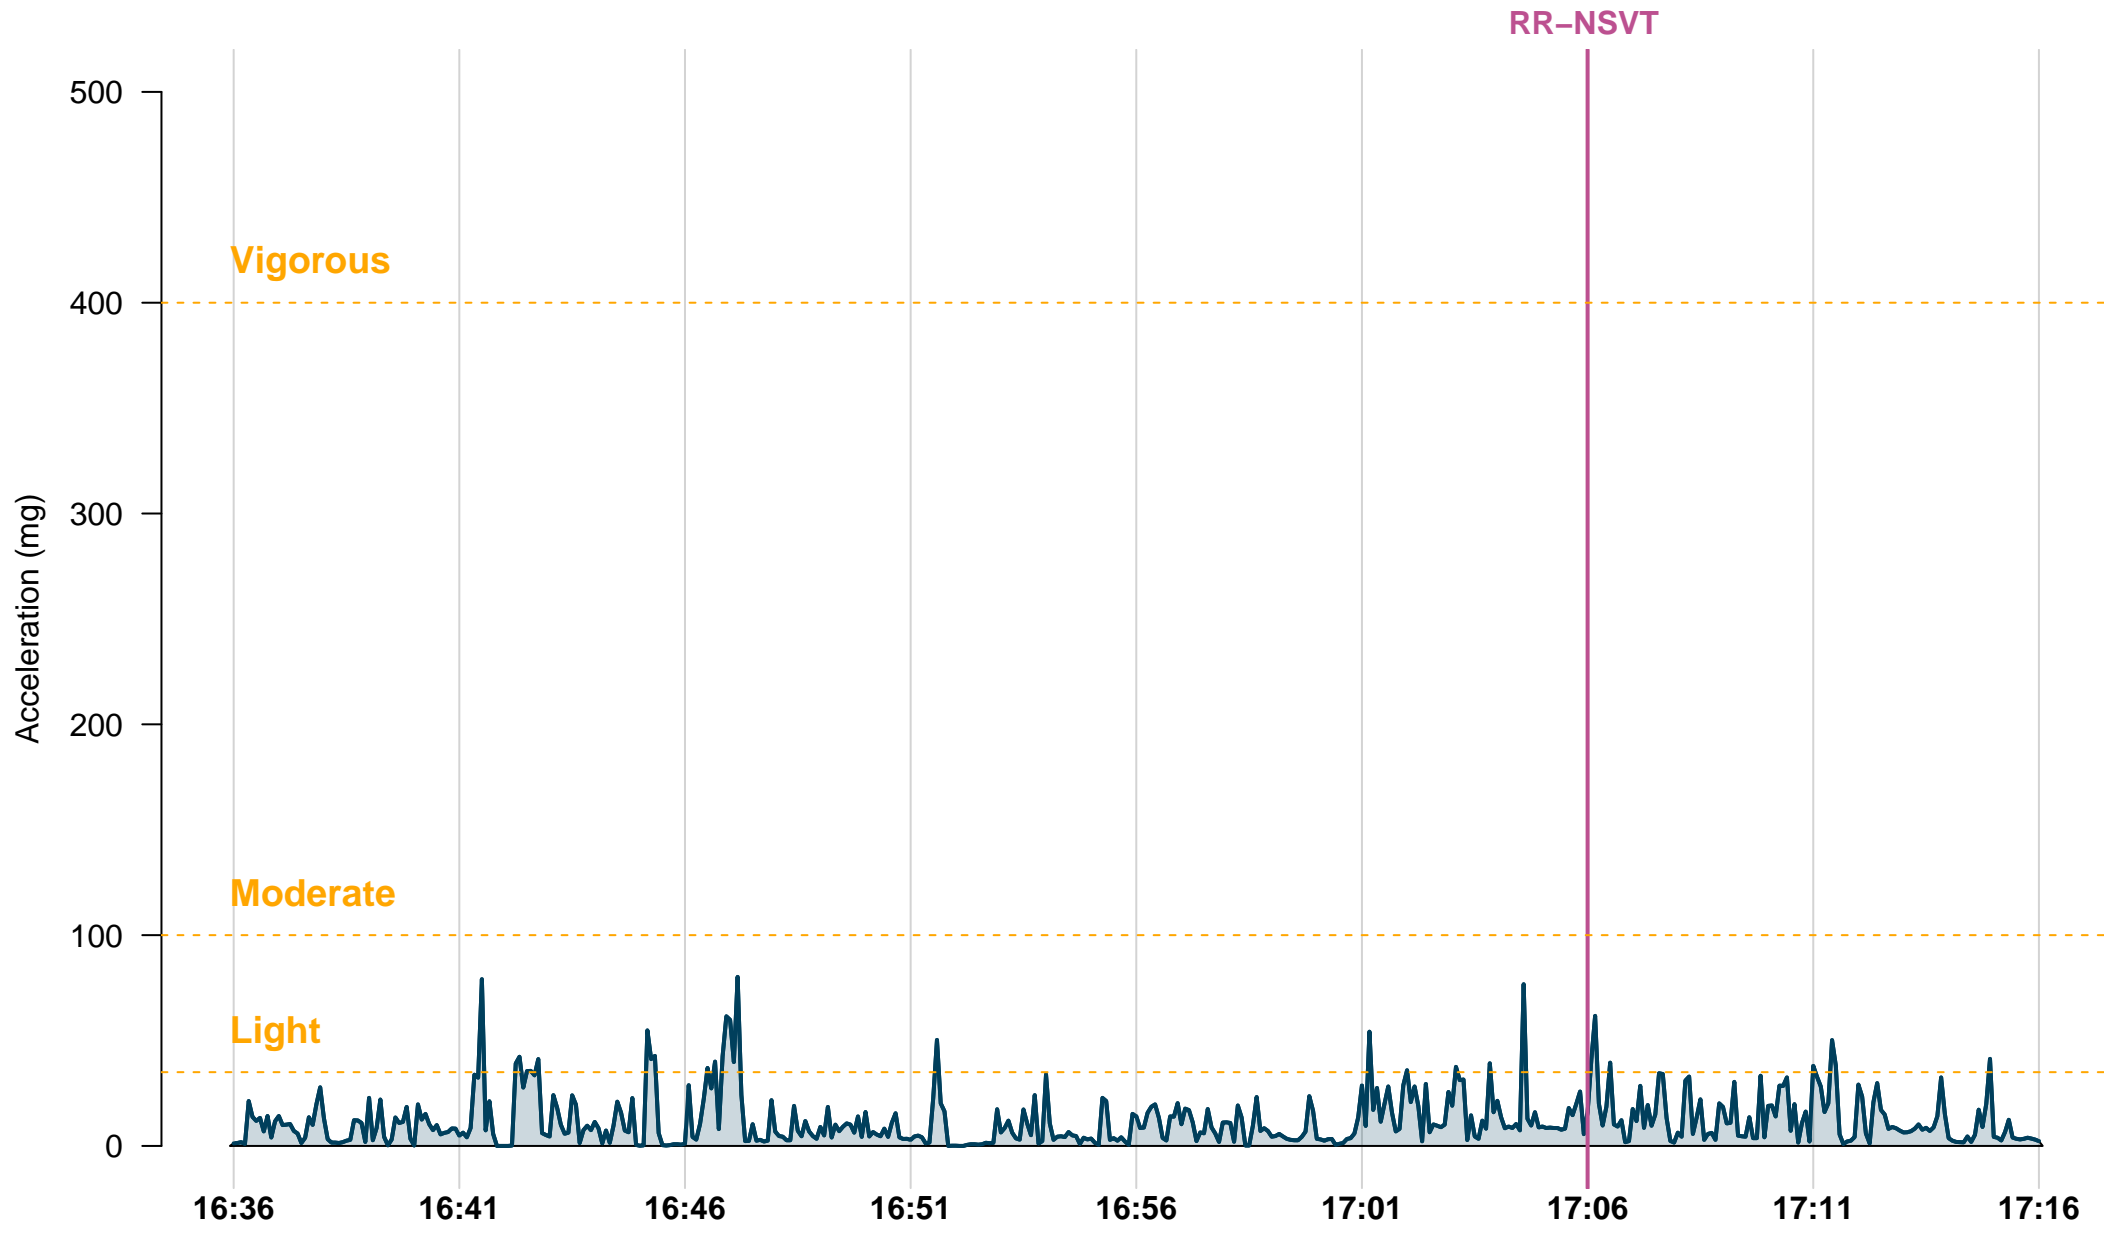



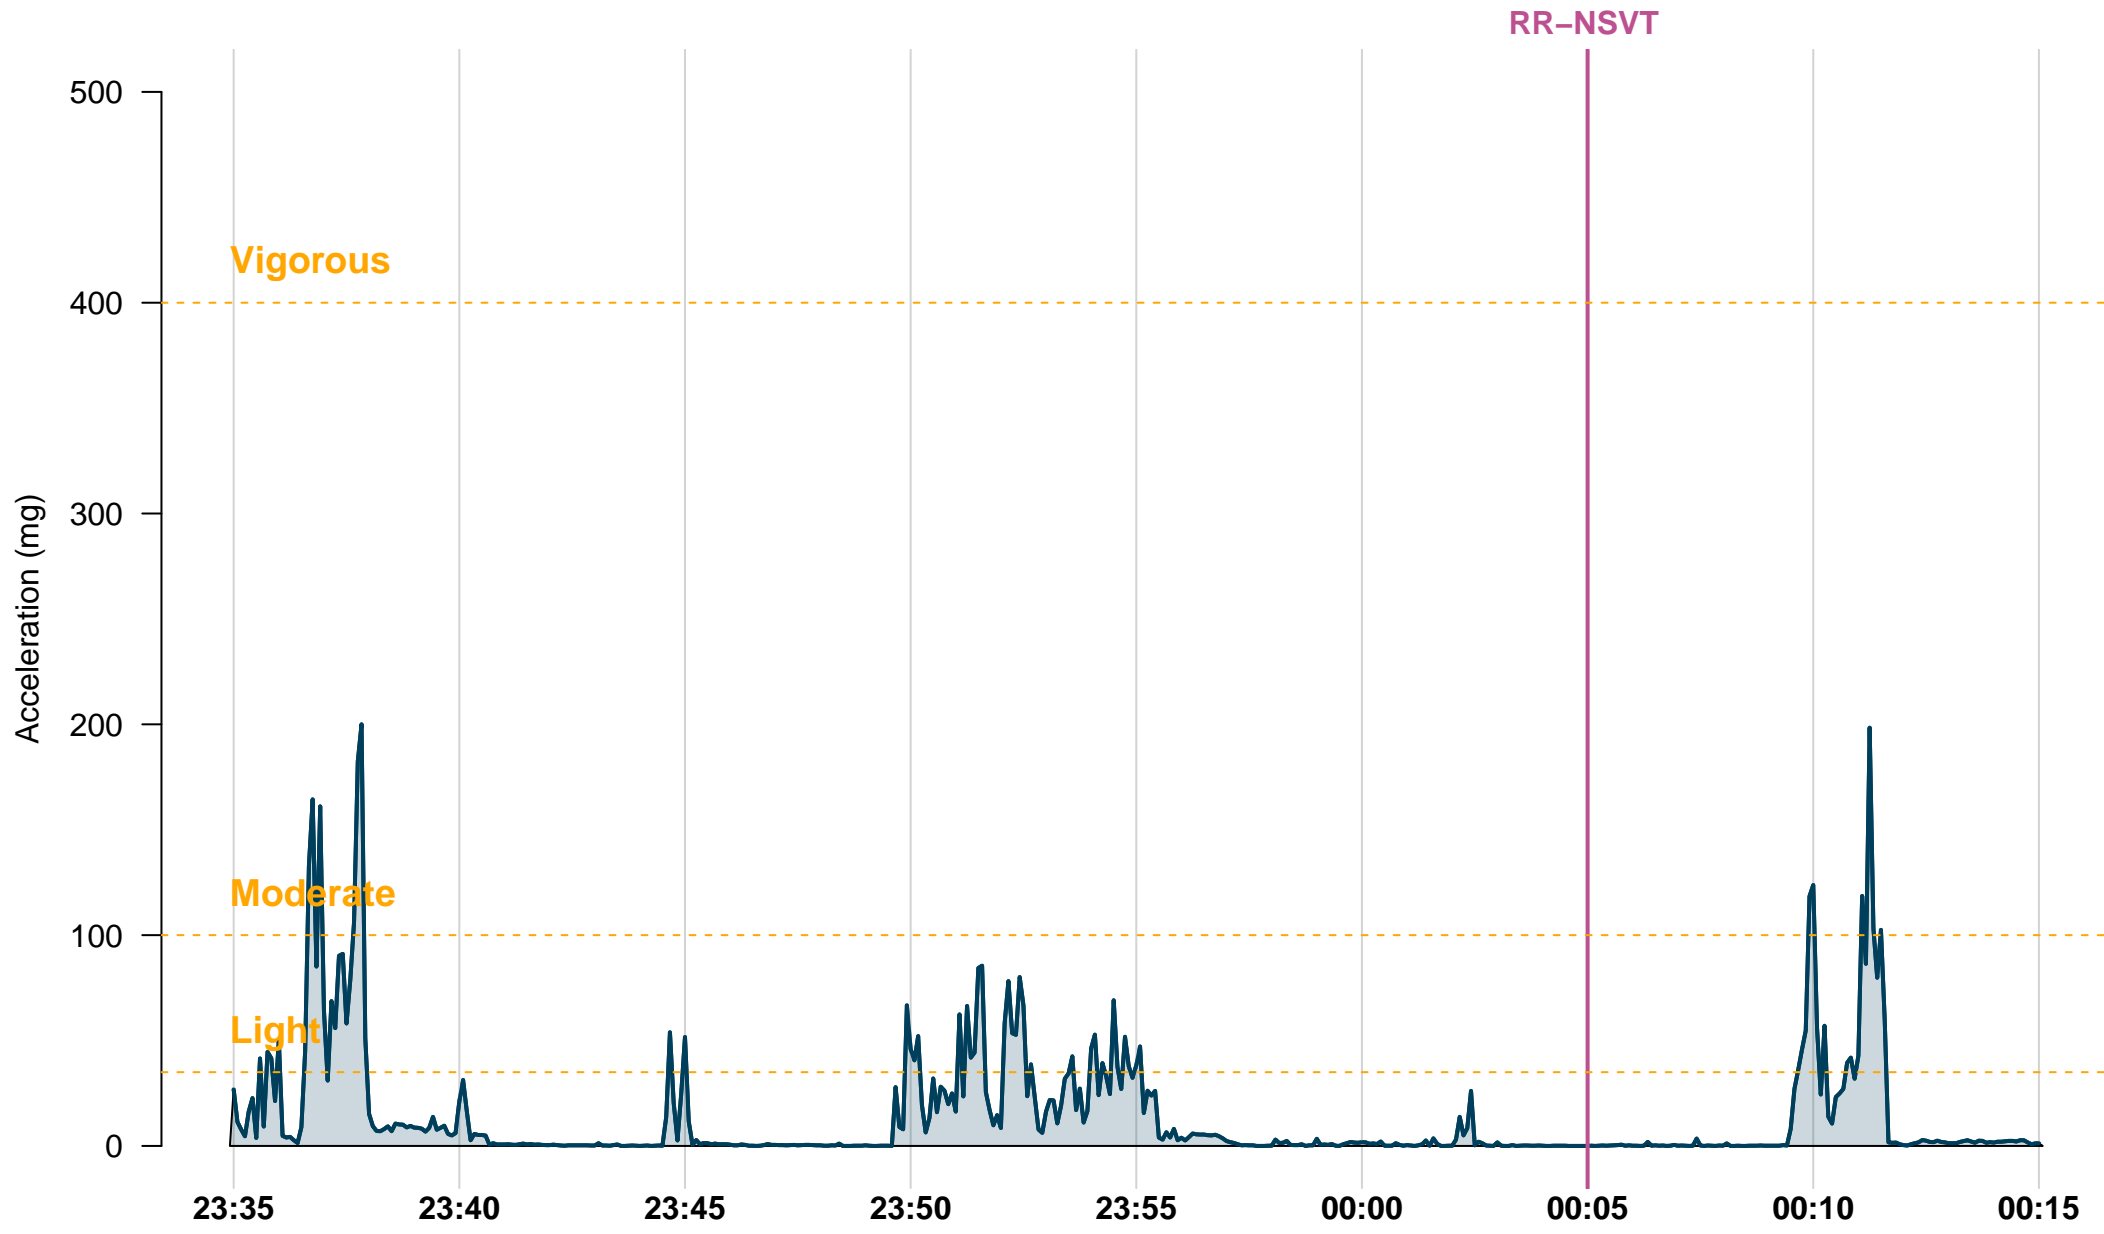

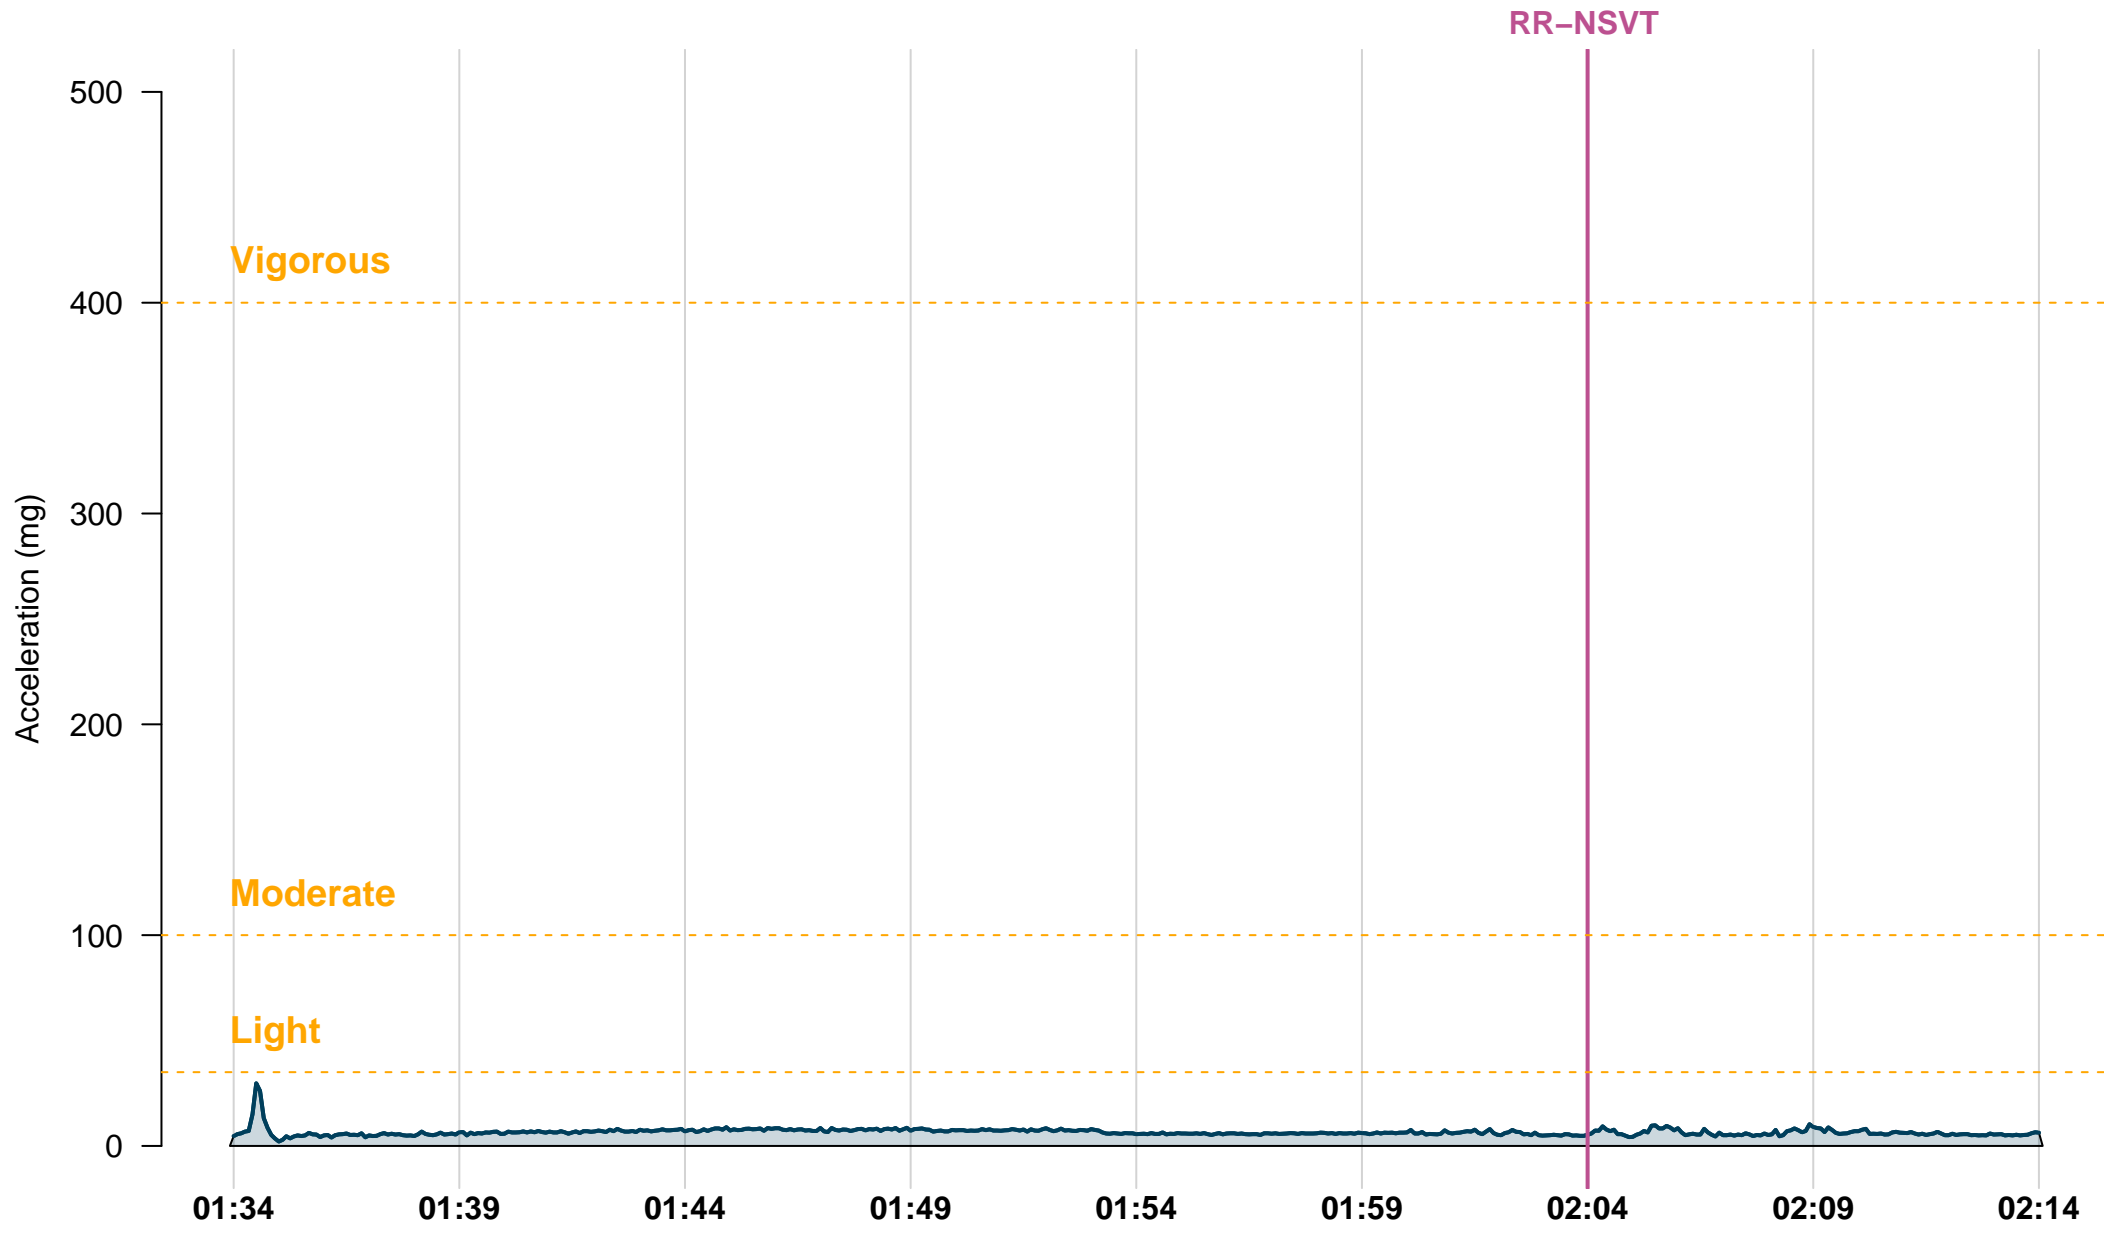

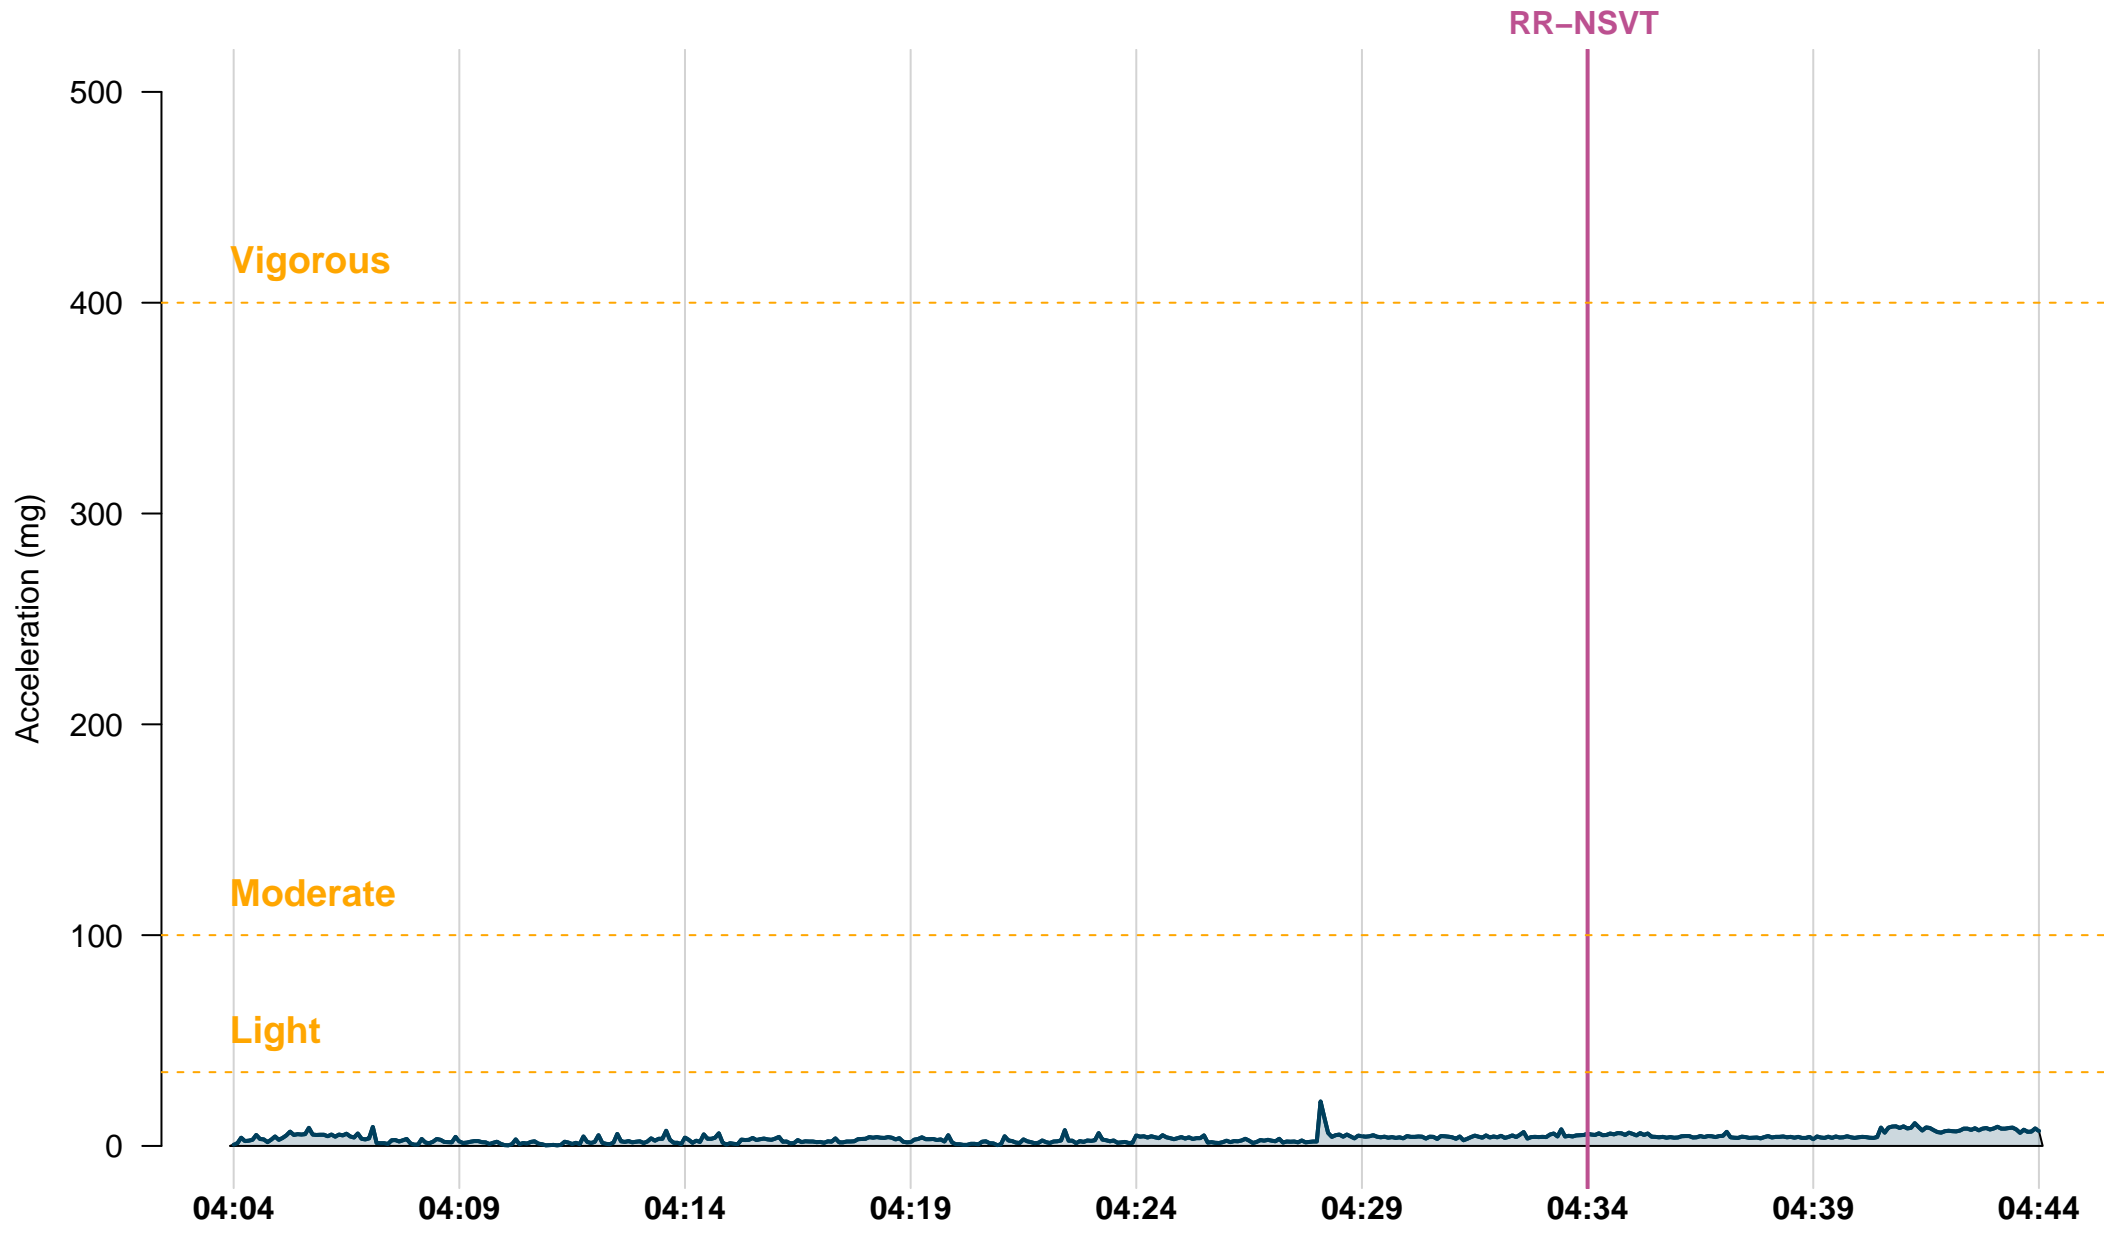

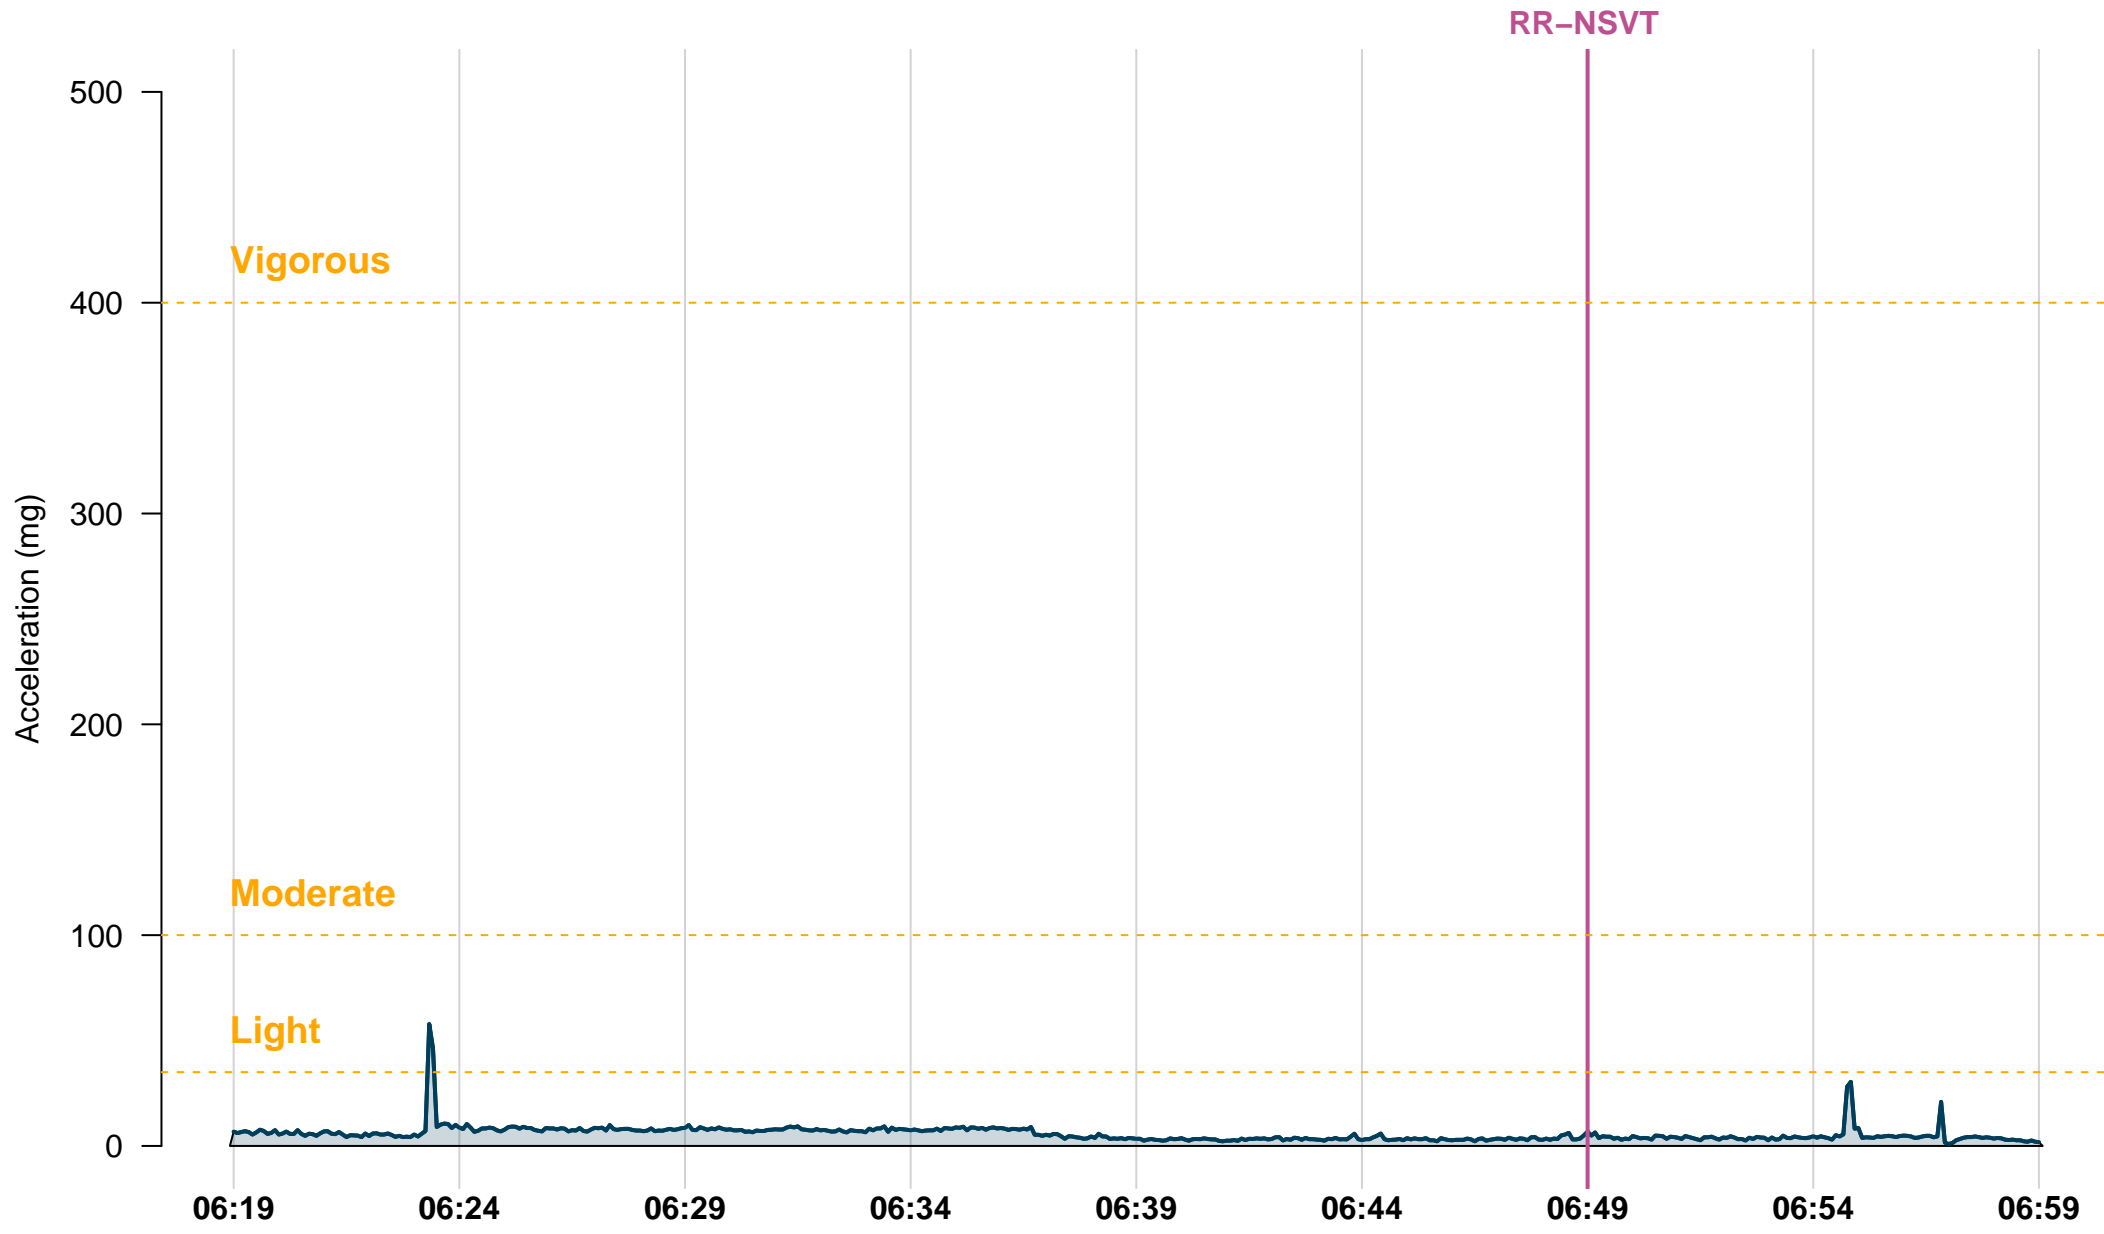

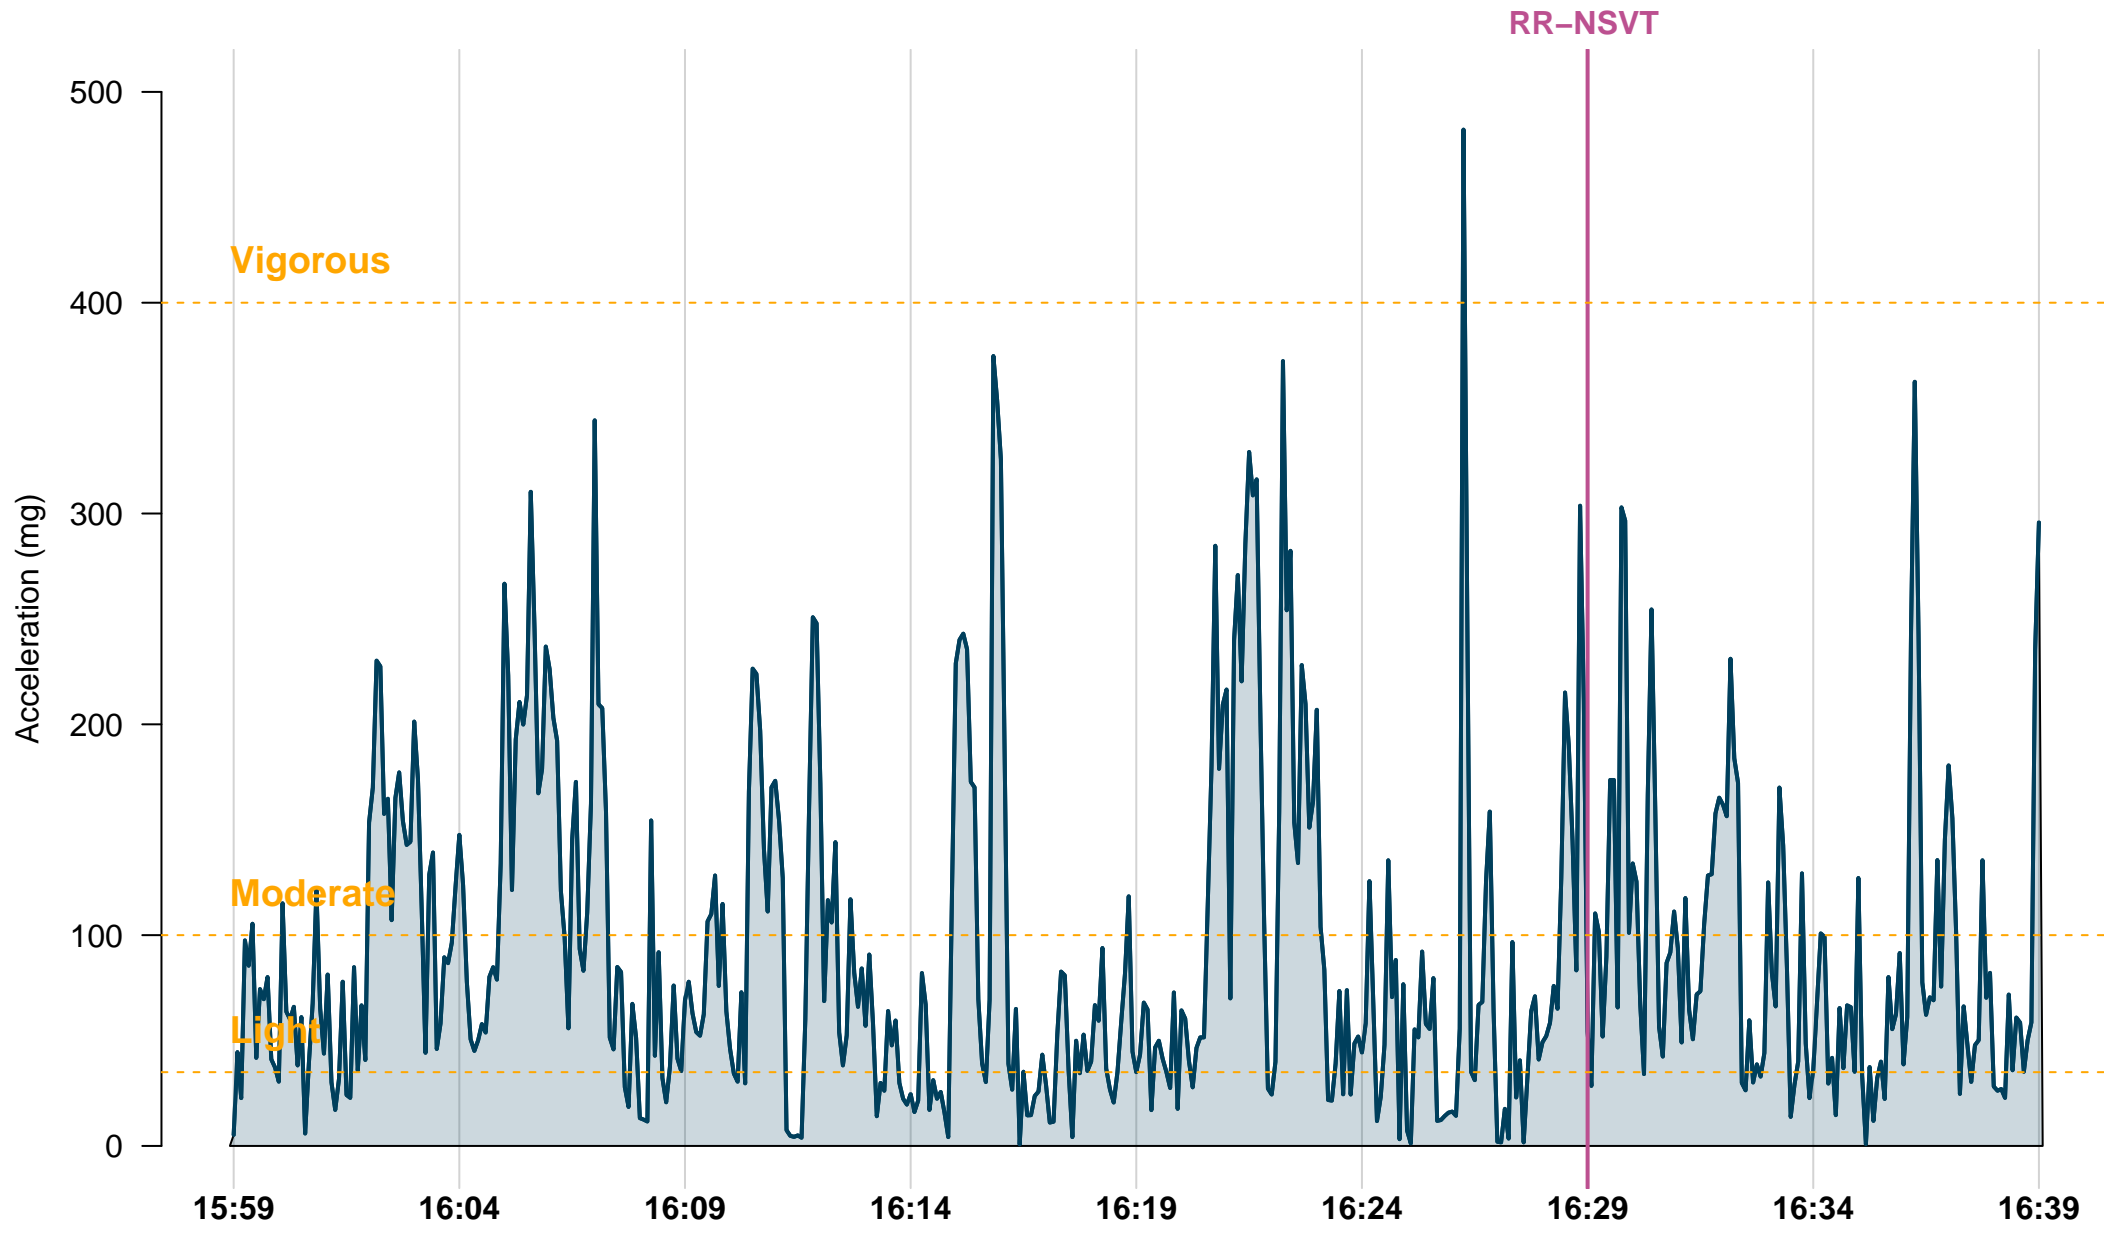

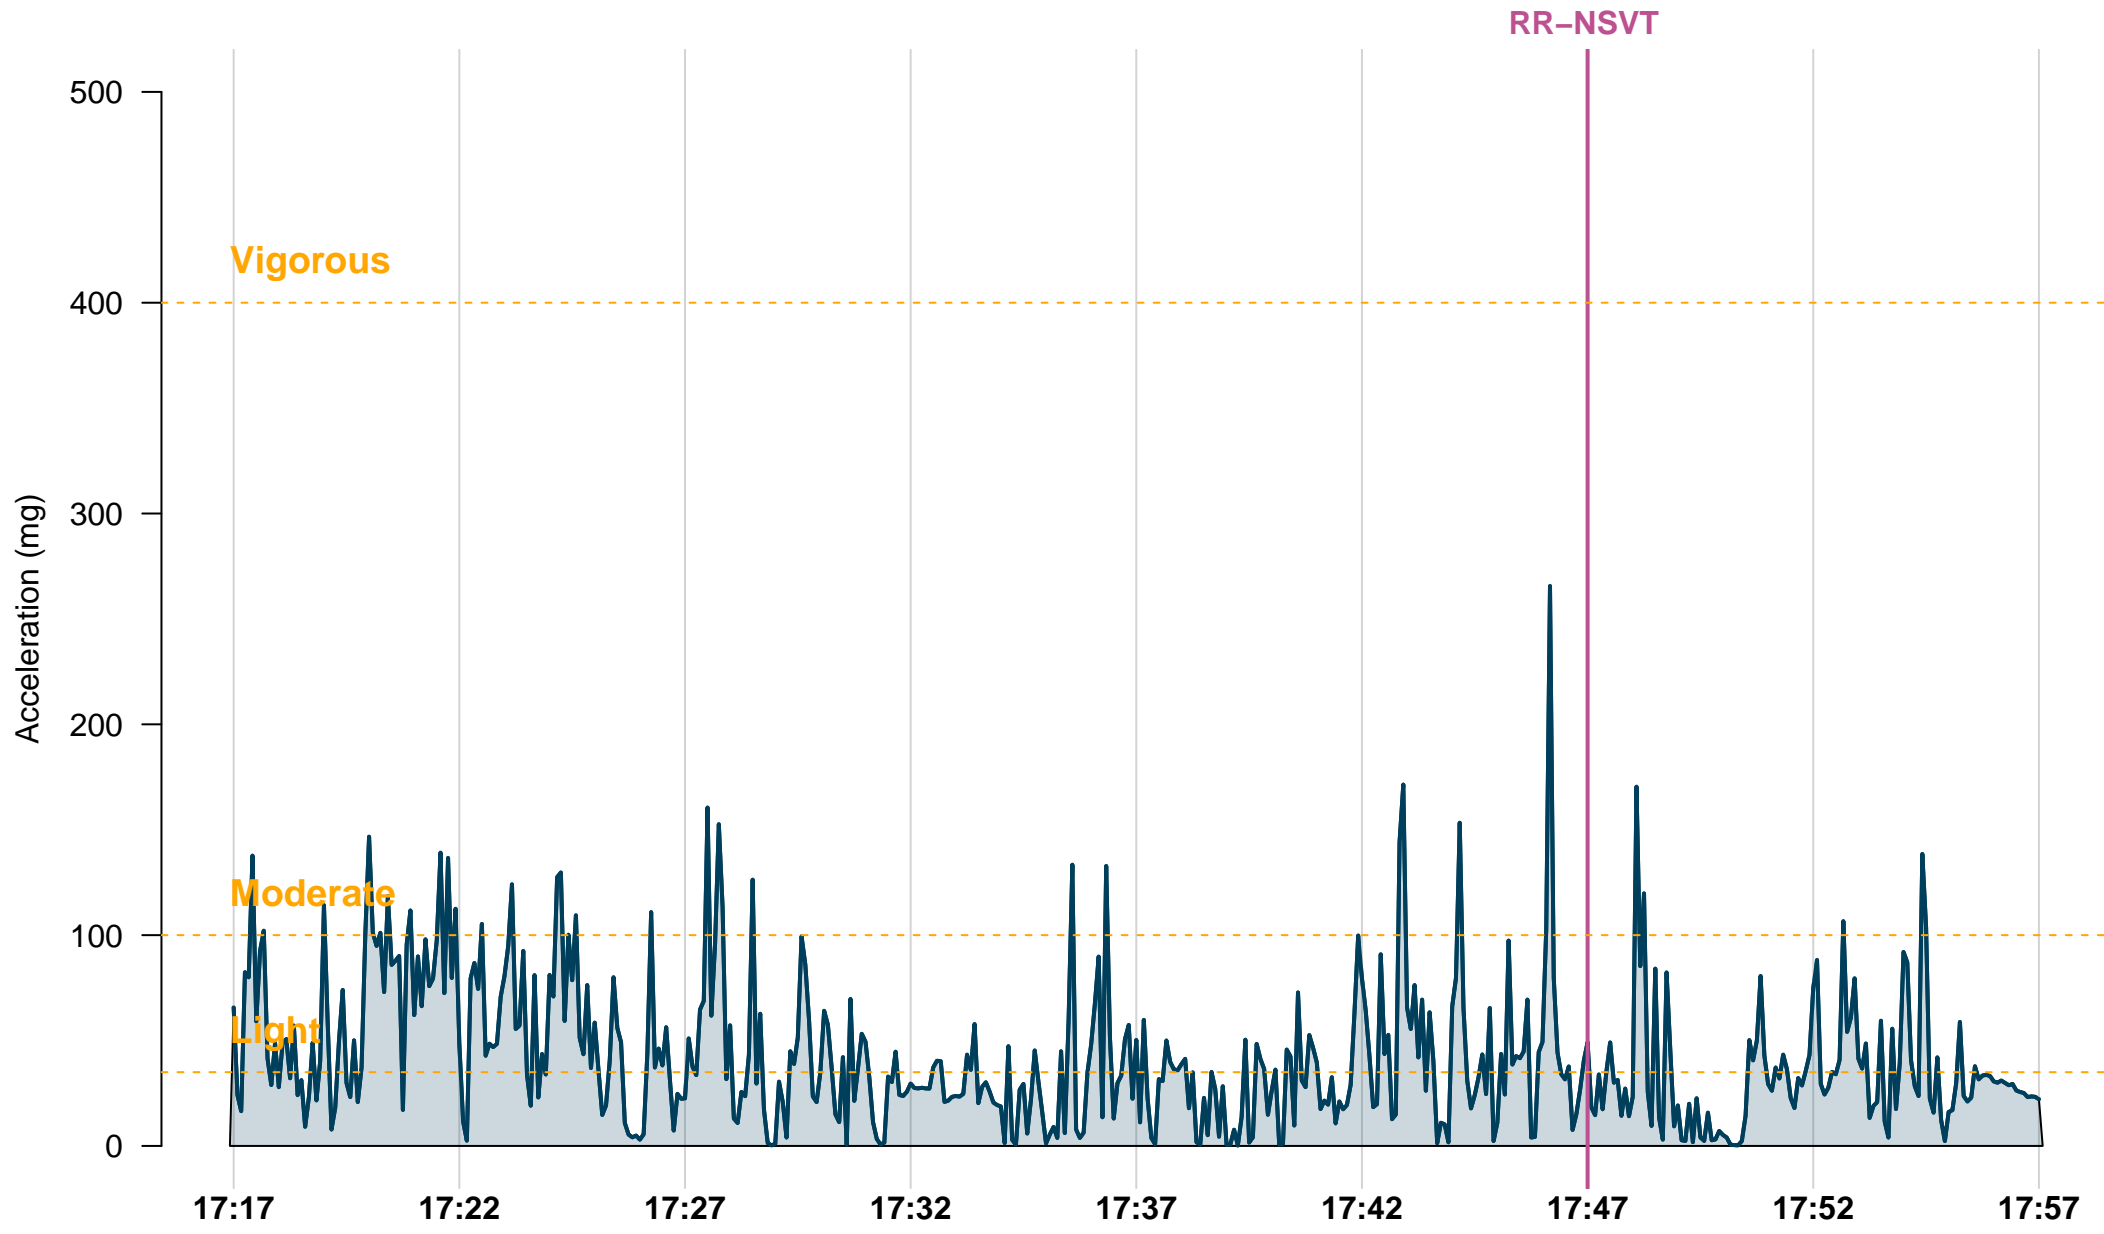

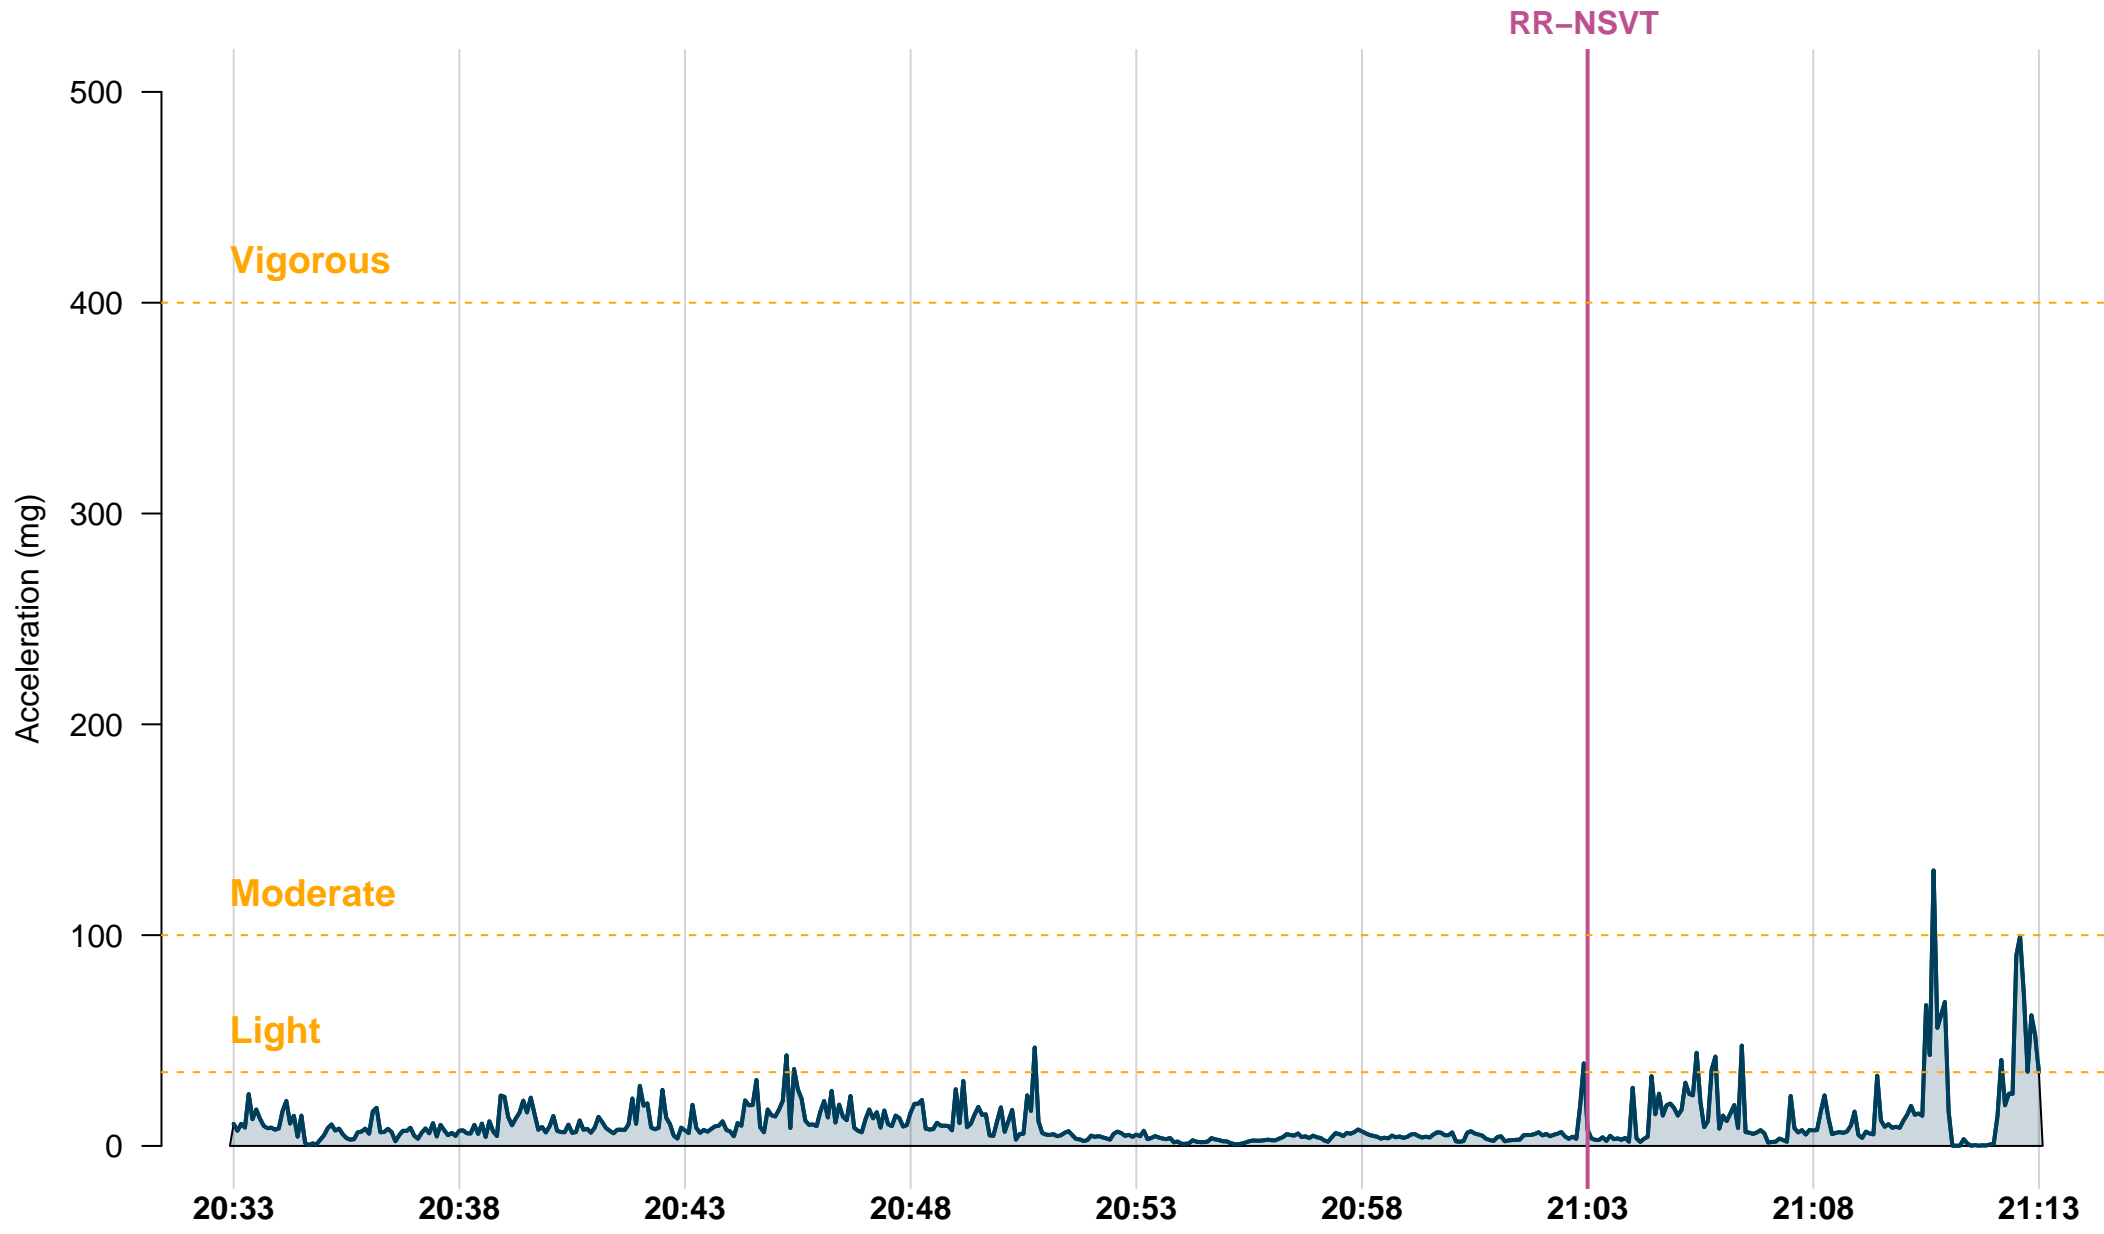

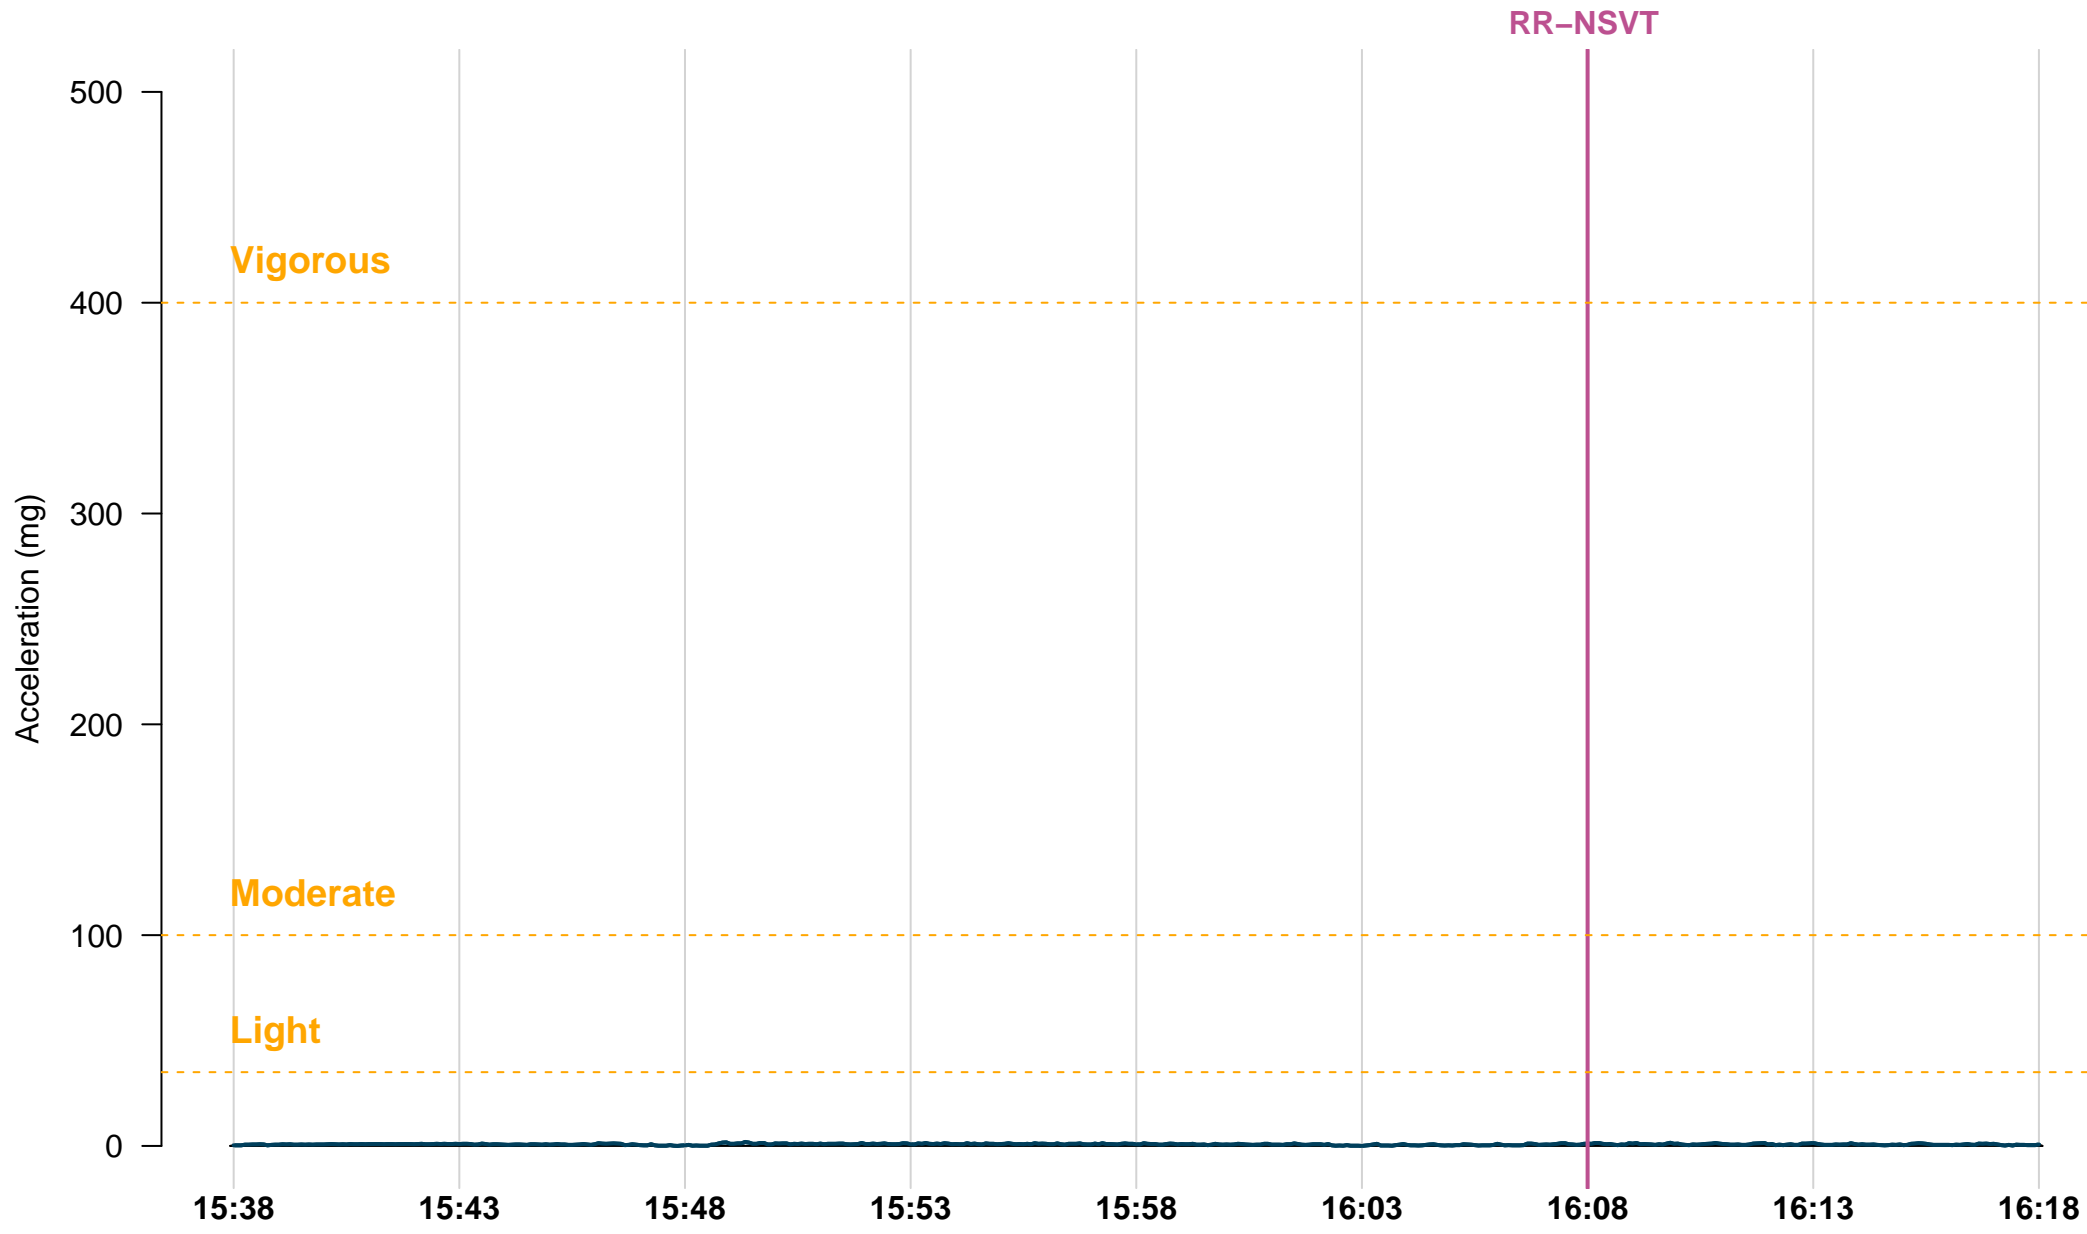



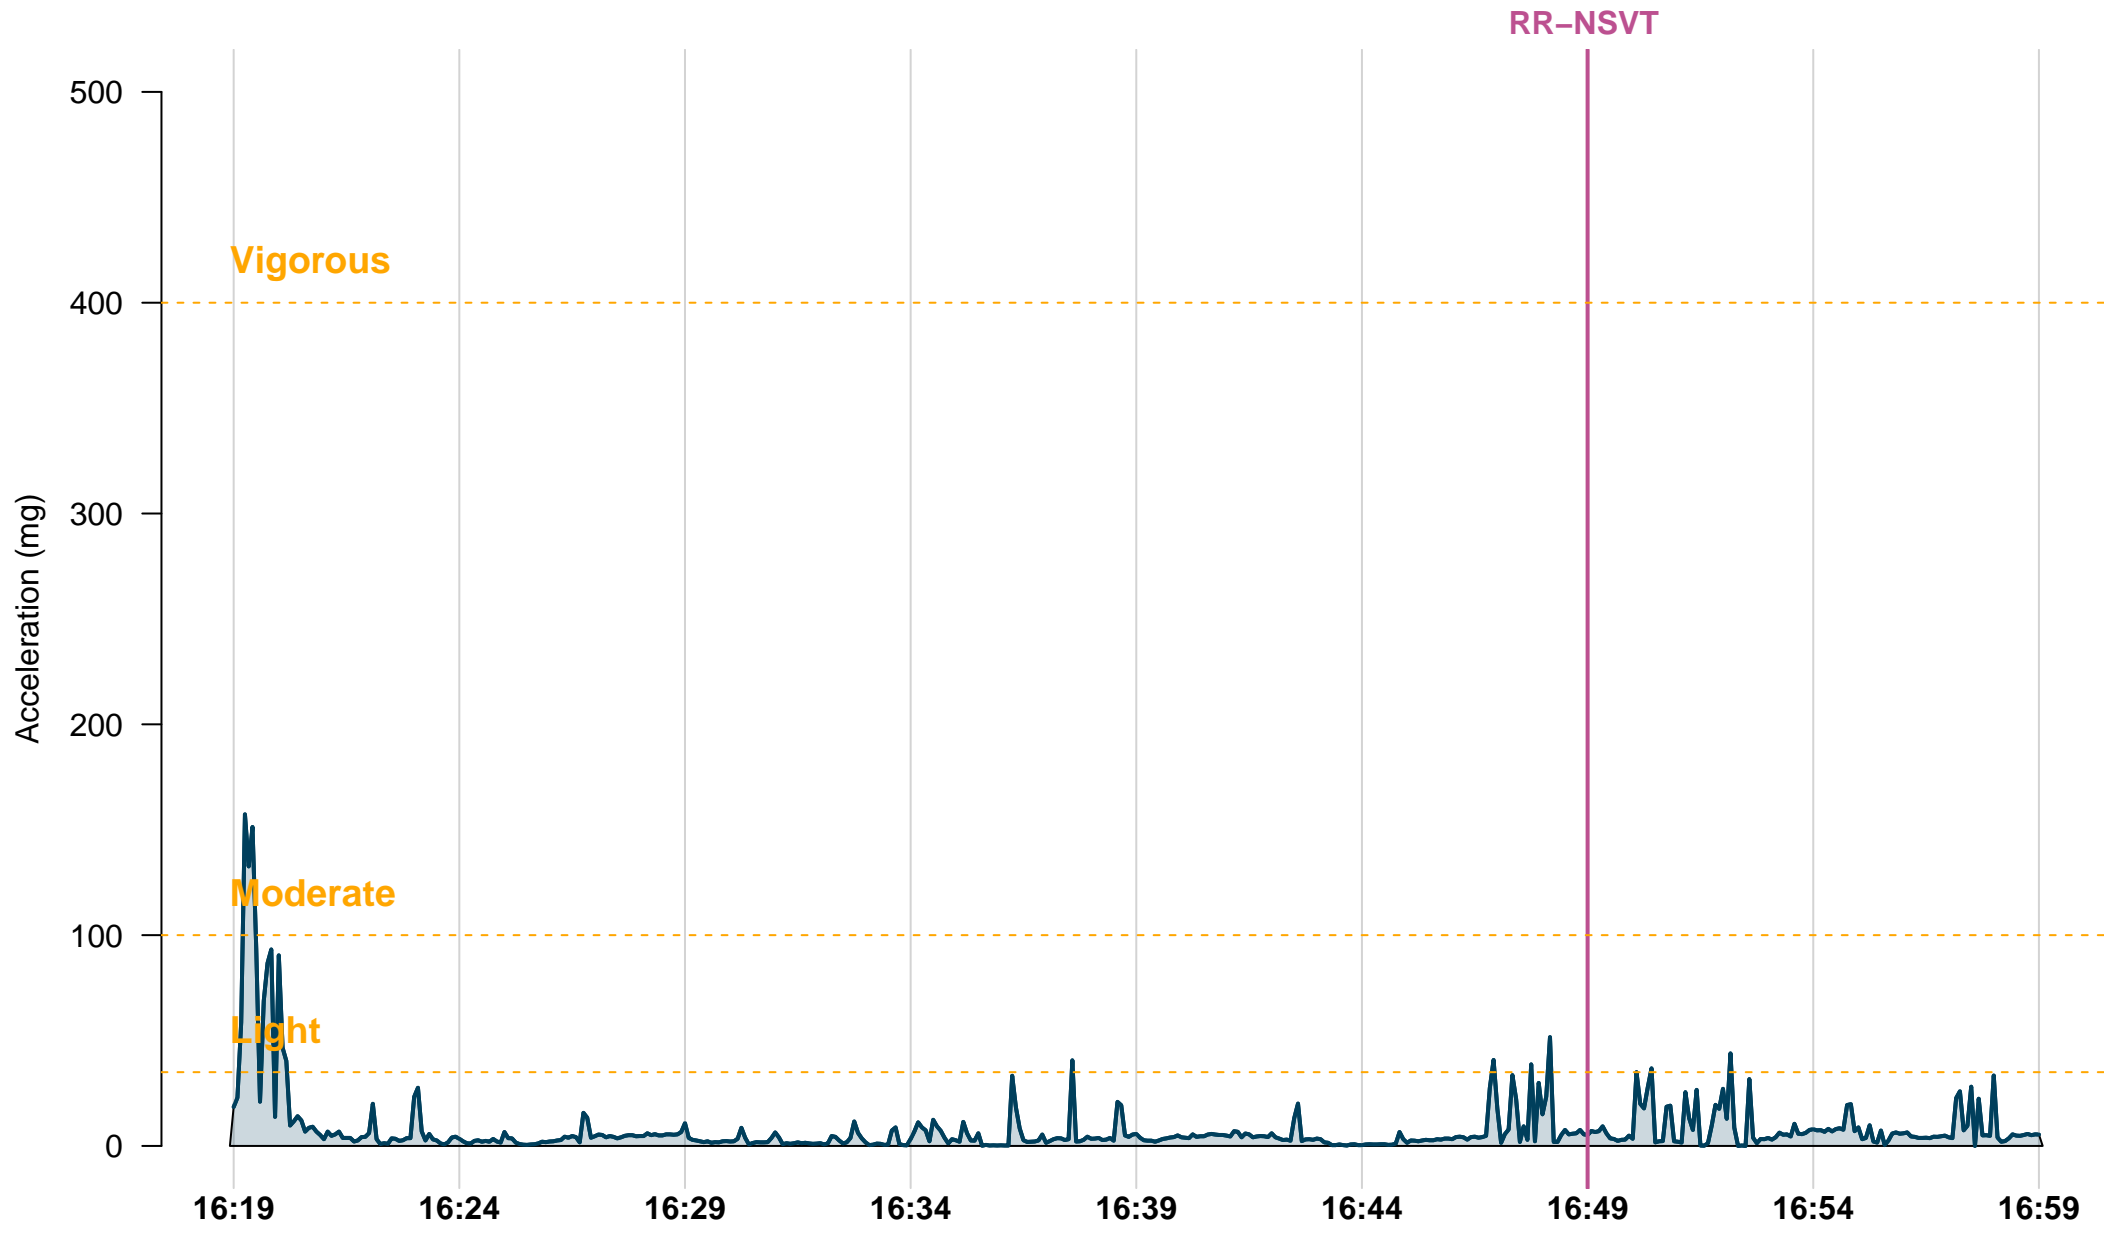

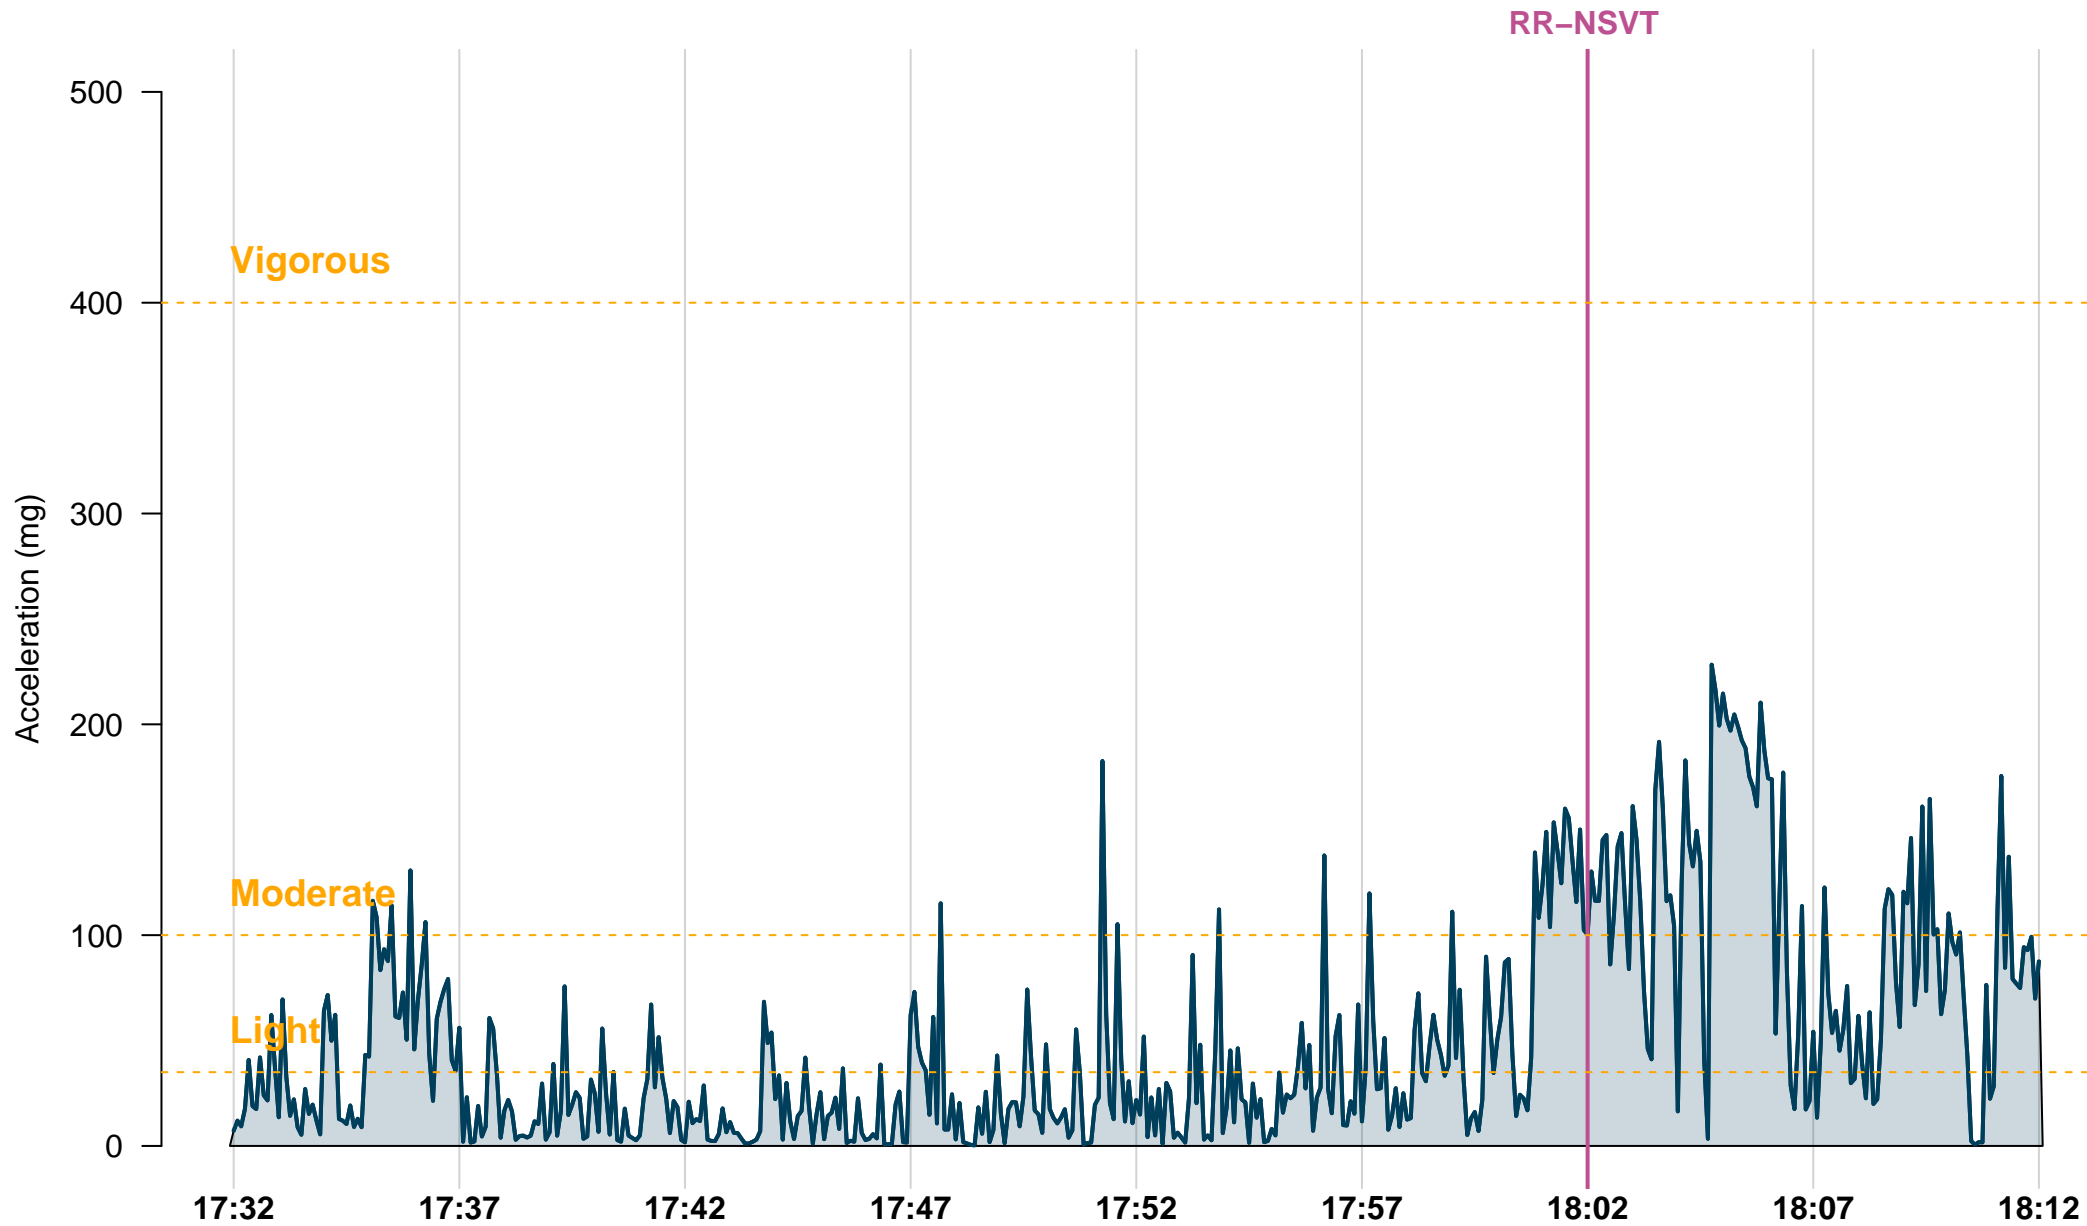

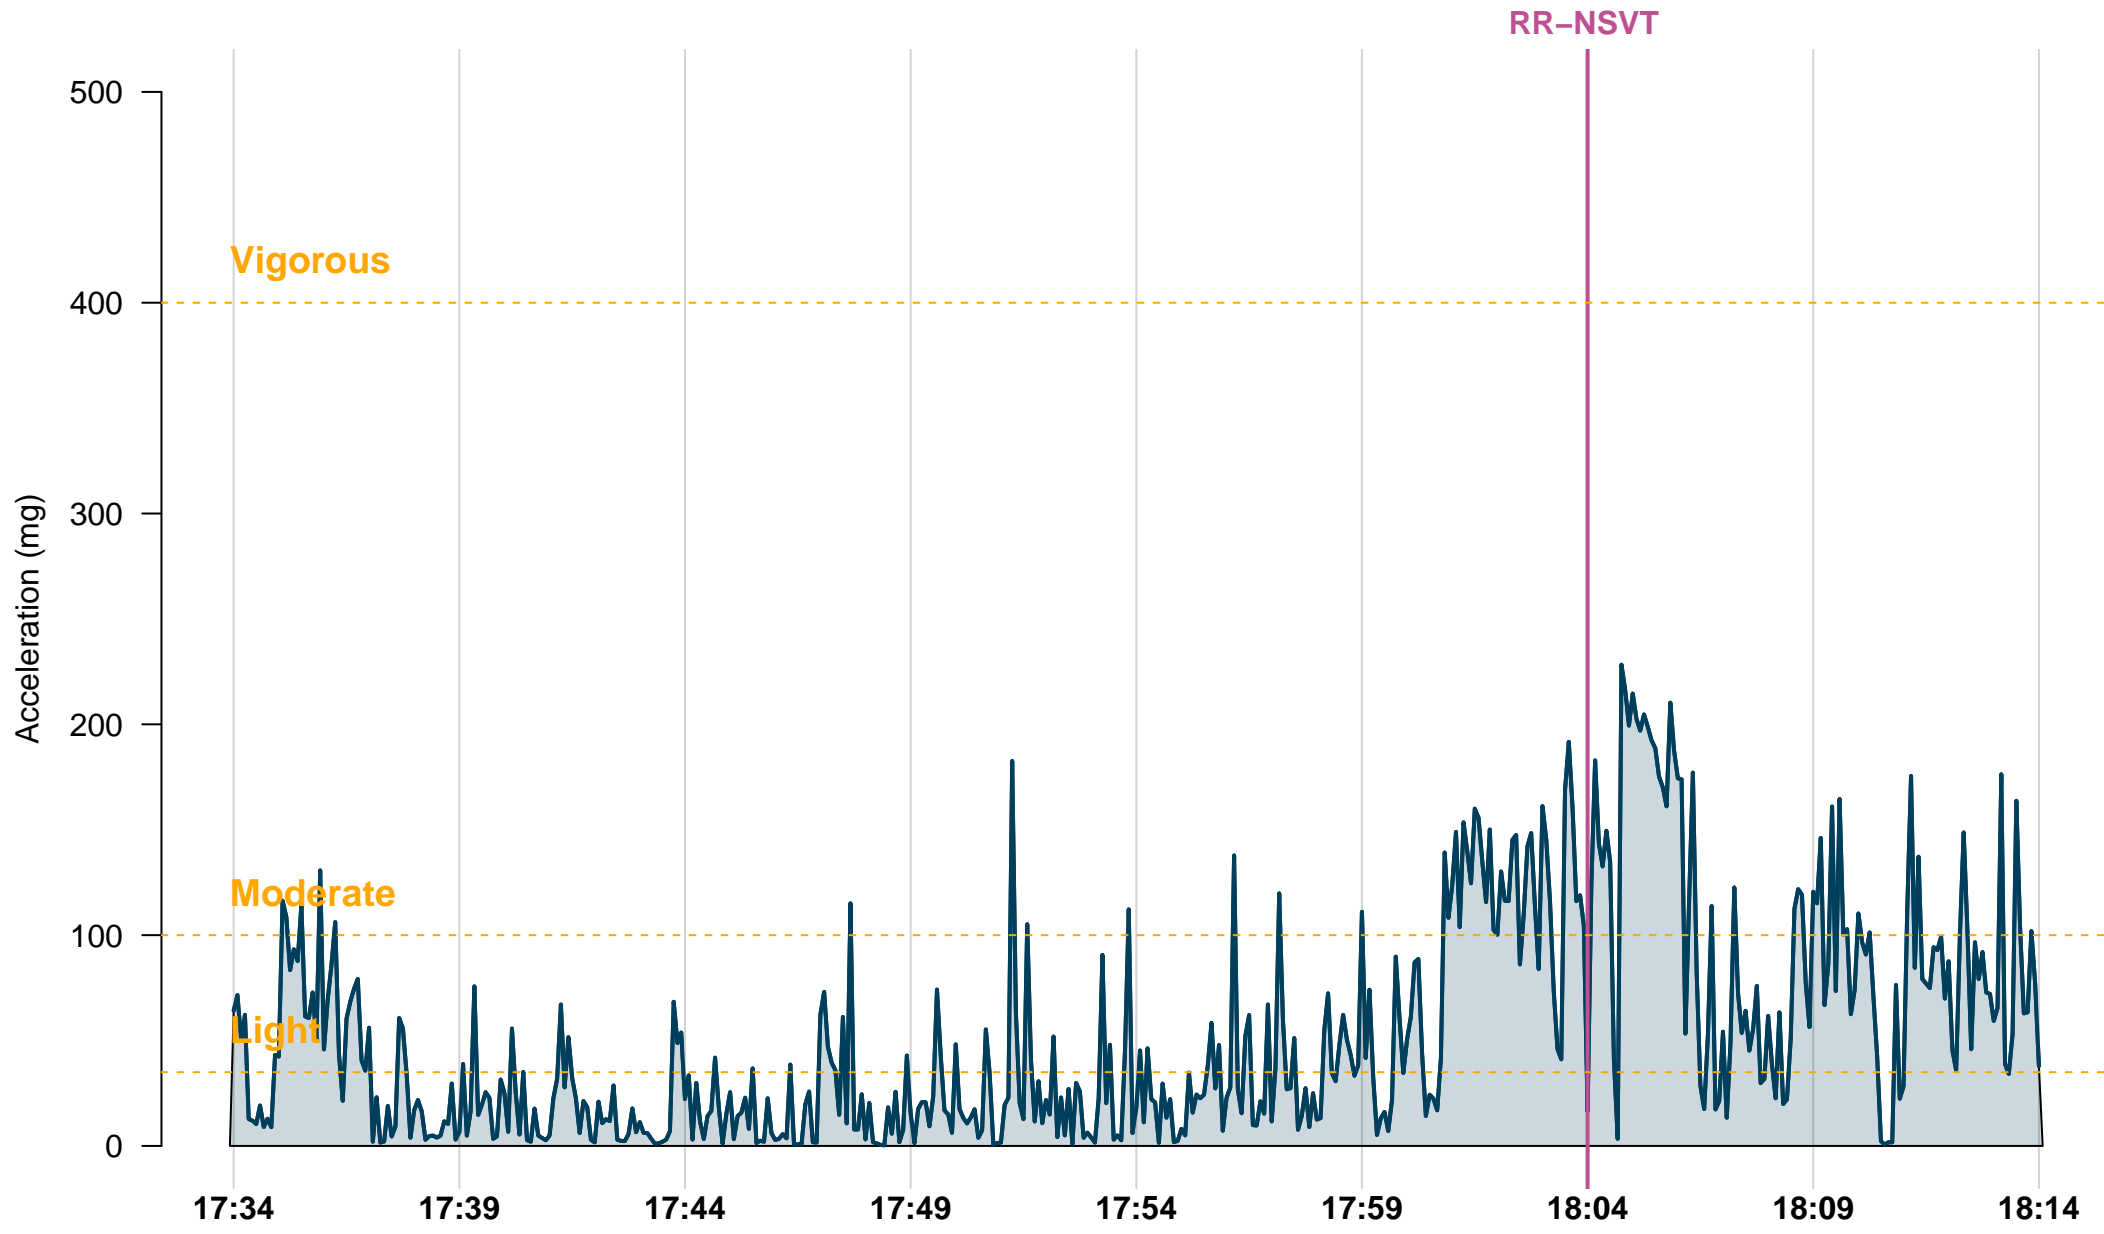

Supplement: Supplementary file [file media-1.pdf]
